# Supplementary material for: Sharing of gut microbial strains between selected individual sets of twins cohabitating for decades
Source: PLoS One. 2019 Dec 5;14(12):e0226111. doi: 10.1371/journal.pone.0226111 (PMC6894816; doi:10.1371/journal.pone.0226111)
Supplement: S1 Table — The original sequence files were sequenced, preprocessed, and deposited by (A) Korpela et al. and (B) Xie et al. To conduct the WSS analysis, all files were downloaded from the European Nucleotide Archive (accession numbers: PRJEB24041 and ERP010708). The table represents the sequence read count before and after filtering processes. (XLSX) [file pone.0226111.s001.xlsx]

## Sheet: S1
S1 Table: Sequence reads information of each sample used in this study. The original sequence files were sequenced, preprocessed, and deposited by (A) Korpela et al. and (B) Xie et al. To conduct the WSS analysis, all files were downloaded from the European Nucleotide Archive (accession numbers: PRJEB24041 and ERP010708). The table represents the sequence read count before and after filtering pro…
(A)									(B)
Sample	Individual ID	Twin #	Raw sequence reads	Filtered sequence reads	Days	Used for analysis? (Y/N)	Country		Sample	Individual ID	Twin #	Raw sequence reads	Filtered sequence reads	How long twins living apart?	Used for analysis? (Y/N)	Age at metagenomics sample	Age at twins start living apart	Country
GE4-1-T0	GE4	Twin1	4138914	3914998	0	N	Germany		P47-2	P47	Twin 2	33721244	32994753	1	Y	80	79	United Kingdom
GE4-1-T7	GE4	Twin1	16362352	15232918	7	Y	Germany		P47-1	P47	Twin 1	30678102	30219983	1	Y	80	79	United Kingdom
GE4-1-T30	GE4	Twin1	19564087	18365339	30	Y	Germany		P7-1	P7	Twin 1	36931854	36242919	5	Y	56	51	United Kingdom
GE4-2-T0	GE4	Twin2	32090520	30818055	0	Y	Germany		P7-2	P7	Twin 2	36191753	35546344	5	Y	56	51	United Kingdom
GE4-2-T7	GE4	Twin2	26624873	25336800	7	Y	Germany		P54-1	P54	Twin 1	40091885	38614121	7	Y	73	66	United Kingdom
GE4-2-T30	GE4	Twin2	17896034	16866721	30	Y	Germany		P54-2	P54	Twin 2	30121216	29476315	7	Y	73	66	United Kingdom
GE3-1-T0	GE3	Twin1	29688378	28323649	0	Y	Germany		P108-2	P108	Twin 2	38922099	38042780	14.5	Y	56	41.5	United Kingdom
GE3-1-T7	GE3	Twin1	31122373	29864735	7	Y	Germany		P108-1	P108	Twin 1	31227728	30772283	14.5	Y	56	41.5	United Kingdom
GE3-1-T30	GE3	Twin1	18789532	17662263	30	Y	Germany		P72-1	P72	Twin 1	31283577	30687804	17	Y	38	21	United Kingdom
GE3-2-T0	GE3	Twin2	33737960	32593511	0	Y	Germany		P72-2	P72	Twin 2	30232555	29717902	17	Y	38	21	United Kingdom
GE3-2-T7	GE3	Twin2	45927702	43856225	7	Y	Germany		P53-1	P53	Twin 1	42673295	41803402	19	Y	36	17	United Kingdom
GE3-2-T30	GE3	Twin2	13004389	12342579	30	Y	Germany		P53-2	P53	Twin 2	31769622	31126708	19	Y	36	17	United Kingdom
GE7-1-T0	GE7	Twin1	45334386	38812871	0	Y	Germany		P60-1	P60	Twin 1	39015501	38301299	19	Y	43	24	United Kingdom
GE7-1-T7	GE7	Twin1	29454282	25373683	7	Y	Germany		P60-2	P60	Twin 2	36895426	36128363	19	Y	43	24	United Kingdom
GE7-1-T30	GE7	Twin1	37828779	36290832	30	Y	Germany		P5-2	P5	Twin 2	36640470	35448541	21.5	Y	42	20.5	United Kingdom
GE7-2-T0	GE7	Twin2	28806760	27968290	0	Y	Germany		P5-1	P5	Twin 1	37575073	36454149	21.5	Y	42	20.5	United Kingdom
GE7-2-T7	GE7	Twin2	28317240	24064526	7	Y	Germany		P127-2	P127	Twin 2	36575082	35606125	23	Y	42	19	United Kingdom
GE7-2-T30	GE7	Twin2	29808161	28347491	30	Y	Germany		P127-1	P127	Twin 1	31733752	31075357	23	Y	42	19	United Kingdom
NL1-1-0	NL1	Twin1	31611323	30525892	0	Y	Netherlands		P43-1	P43	Twin 1	37885924	37119643	24.0551	Y	41.5551	17.5	United Kingdom
NL1-1-7	NL1	Twin1	34063054	33055080	7	Y	Netherlands		P43-2	P43	Twin 2	37900420	36710486	24.0551	Y	41.5551	17.5	United Kingdom
NL1-1-28	NL1	Twin1	25834594	24927642	28	Y	Netherlands		P89-1	P89	Twin 1	41832679	40854441	23.5161	Y	46.5161	23	United Kingdom
NL1-2-0	NL1	Twin2	26934562	25637986	0	Y	Netherlands		P89-2	P89	Twin 2	38340124	37294249	23.5161	Y	46.5161	23	United Kingdom
NL1-2-7	NL1	Twin2	27137581	25994596	7	Y	Netherlands		P75-2	P75	Twin 2	39344671	37646184	30	Y	54	24	United Kingdom
NL1-2-28	NL1	Twin2	33134538	32070514	28	Y	Netherlands		P75-1	P75	Twin 1	37072714	36185349	30	Y	54	24	United Kingdom
									P79-2	P79	Twin 2	37549093	37048116	30	Y	48.5804	18.5	United Kingdom
									P79-1	P79	Twin 1	37362153	36173797	30	Y	48.5804	18.5	United Kingdom
									P34-1	P34	Twin 1	34134718	33323465	35	Y	57.4155	22	United Kingdom
									P34-2	P34	Twin 2	30437504	29776423	35	Y	57.4155	22	United Kingdom
									P82-1	P82	Twin 1	35136635	34192829	40	Y	59.6167	20	United Kingdom
									P82-2	P82	Twin 2	39958466	39085191	40	Y	59.6167	20	United Kingdom
									P95-2	P95	Twin 2	39561156	38308175	42	Y	62.1218	20	United Kingdom
									P95-1	P95	Twin 1	35335498	34483720	42	Y	62.1218	20	United Kingdom
									P93-1	P93	Twin 1	41591171	40430152	47	Y	66.642	20	United Kingdom
									P93-2	P93	Twin 2	41650414	40662102	47	Y	66.642	20	United Kingdom
									P96-1	P96	Twin 1	38821324	37890412	47	Y	64.6105	17.5	United Kingdom
									P96-2	P96	Twin 2	37713983	36706021	47	Y	64.6105	17.5	United Kingdom
									P29-1	P29	Twin 1	35501685	34921685	50	Y	67.8029	18	United Kingdom
									P29-2	P29	Twin 2	36830303	36115145	50	Y	67.8029	18	United Kingdom
									P97-1	P97	Twin 1	38257995	37377196	54	Y	70	16	United Kingdom
									P97-2	P97	Twin 2	29502751	28955587	54	Y	70	16	United Kingdom
									P38-1	P38	Twin 1	34960896	34069721	54	Y	70.7652	17	United Kingdom
									P38-2	P38	Twin 2	35492032	34324566	54	Y	70.7652	17	United Kingdom
									P20-1	P20	Twin 1	34109002	33384419	55	Y	72.8159	17.5	United Kingdom
									P20-2	P20	Twin 2	32148857	31499677	55	Y	72.8159	17.5	United Kingdom
									P59-1	P59	Twin 1	33917436	33152334	57	Y	78.2971	21	United Kingdom
									P59-2	P59	Twin 2	35006720	34068997	57	Y	78.2971	21	United Kingdom
									P117-2	P117	Twin 2	34842669	34074985	58	Y	79	21	United Kingdom
									P117-1	P117	Twin 1	31422046	30934593	58	Y	79	21	United Kingdom
									P46-1	P46	Twin 1	32499173	31768650	59	Y	77	18	United Kingdom
									P46-2	P46	Twin 2	37346155	36138017	59	Y	77	18	United Kingdom
