# Supplementary material for: Sharing of gut microbial strains between selected individual sets of twins cohabitating for decades
Source: PLoS One. 2019 Dec 5;14(12):e0226111. doi: 10.1371/journal.pone.0226111 (PMC6894816; doi:10.1371/journal.pone.0226111)
Supplement: S4 Table — All individual samples from (A) children twin sets (Korpela et al.) and (B) a subset of 8 adult twin sets (P47, P7, P54, P53, P5, P82, P29, and P97) from Xie et al. were used to run WSS analysis. Related strains (WSS score > cut-off value) between sample 1 and sample 2 were colored in red. (XLSX) [file pone.0226111.s004.xlsx]

## Sheet: Sheet1
S4 Table: WSS analysis. All individual samples from (A) children twin sets (Korpela et al.) and (B) a subset of 8 adult twin sets (P47, P7, P54, P53, P5, P82, P29, and P97) from Xie et al. were used to run WSS analysis. Related strains (WSS score > cut-off value) between sample 1 and sample 2 were colored in red.
(A)						(B)
Species	Sample 1	Sample 2	WSS score			Species	Sample 1	Sample 2	WSS score
Akkermansia_muciniphila	NL1-1-T28	NL1-1-T0	100			Akkermansia_muciniphila	P5-1	P5-2	100
Akkermansia_muciniphila	NL1-1-T28	NL1-1-T7	100			Akkermansia_muciniphila	P7-2	P82-2	99
Akkermansia_muciniphila	NL1-1-T0	NL1-1-T7	100			Akkermansia_muciniphila	P7-1	P7-2	97
Akkermansia_muciniphila	GE4-1-T7	GE4-1-T30	100			Akkermansia_muciniphila	P7-1	P82-2	97
Akkermansia_muciniphila	GE4-1-T7	GE4-2-T0	100			Akkermansia_muciniphila	P29-1	P5-1	21
Akkermansia_muciniphila	GE4-1-T30	GE4-2-T0	100			Akkermansia_muciniphila	P29-1	P5-2	21
Akkermansia_muciniphila	GE7-2-T0	GE7-2-T7	100			Akkermansia_muciniphila	P29-1	P54-2	20
Akkermansia_muciniphila	GE7-2-T0	GE7-2-T30	100			Akkermansia_muciniphila	P5-1	P54-2	20
Akkermansia_muciniphila	NL1-2-T7	NL1-2-T28	100			Akkermansia_muciniphila	P5-2	P54-2	20
Akkermansia_muciniphila	GE7-2-T7	GE7-2-T30	100			Akkermansia_muciniphila	P29-1	P82-1	10
Akkermansia_muciniphila	NL1-2-T0	NL1-2-T7	100			Akkermansia_muciniphila	P5-1	P82-1	10
Akkermansia_muciniphila	NL1-2-T0	NL1-2-T28	100			Akkermansia_muciniphila	P5-2	P82-1	10
Akkermansia_muciniphila	GE4-1-T7	GE4-2-T7	100			Akkermansia_muciniphila	P54-2	P82-1	10
Akkermansia_muciniphila	GE4-1-T30	GE4-2-T7	100			Akkermansia_muciniphila	P29-2	P97-2	3
Akkermansia_muciniphila	GE4-2-T0	GE4-2-T7	100			Akkermansia_muciniphila	P29-1	P29-2	1
Akkermansia_muciniphila	GE4-1-T7	GE4-2-T30	100			Akkermansia_muciniphila	P29-1	P97-2	1
Akkermansia_muciniphila	GE4-1-T30	GE4-2-T30	100			Akkermansia_muciniphila	P29-2	P5-1	1
Akkermansia_muciniphila	GE4-2-T0	GE4-2-T30	100			Akkermansia_muciniphila	P29-2	P5-2	1
Akkermansia_muciniphila	GE4-2-T7	GE4-2-T30	100			Akkermansia_muciniphila	P29-2	P54-2	1
Akkermansia_muciniphila	GE7-1-T0	GE4-2-T30	22			Akkermansia_muciniphila	P29-2	P82-1	1
Akkermansia_muciniphila	GE7-1-T0	GE4-2-T7	12			Akkermansia_muciniphila	P5-1	P97-2	1
Akkermansia_muciniphila	GE7-1-T0	GE4-1-T7	11			Akkermansia_muciniphila	P5-2	P97-2	1
Akkermansia_muciniphila	GE7-1-T0	GE4-1-T30	11			Akkermansia_muciniphila	P54-2	P97-2	1
Akkermansia_muciniphila	GE7-1-T0	GE4-2-T0	11			Akkermansia_muciniphila	P5-2	P7-2	1
Akkermansia_muciniphila	GE7-2-T0	NL1-1-T7	7			Akkermansia_muciniphila	P5-2	P82-2	1
Akkermansia_muciniphila	GE7-2-T7	NL1-1-T7	7			Akkermansia_muciniphila	P82-1	P97-2	0
Akkermansia_muciniphila	GE7-2-T30	NL1-1-T7	7			Akkermansia_muciniphila	P29-2	P7-2	0
Akkermansia_muciniphila	NL1-2-T28	NL1-1-T7	6			Akkermansia_muciniphila	P29-1	P7-1	0
Akkermansia_muciniphila	NL1-1-T28	GE4-2-T30	5			Akkermansia_muciniphila	P29-1	P7-2	0
Akkermansia_muciniphila	NL1-1-T0	GE4-2-T30	5			Akkermansia_muciniphila	P7-1	P82-1	0
Akkermansia_muciniphila	GE7-2-T0	GE4-2-T30	5			Akkermansia_muciniphila	P7-1	P97-2	0
Akkermansia_muciniphila	GE7-2-T7	GE4-2-T30	5			Akkermansia_muciniphila	P7-2	P82-1	0
Akkermansia_muciniphila	GE7-2-T30	GE4-2-T30	5			Akkermansia_muciniphila	P7-2	P97-2	0
Akkermansia_muciniphila	NL1-1-T7	GE4-2-T30	5			Akkermansia_muciniphila	P29-2	P7-1	0
Akkermansia_muciniphila	NL1-2-T7	NL1-1-T7	5			Akkermansia_muciniphila	P5-1	P7-1	0
Akkermansia_muciniphila	NL1-2-T0	NL1-1-T7	5			Akkermansia_muciniphila	P5-1	P7-2	0
Akkermansia_muciniphila	GE7-2-T0	NL1-1-T28	5			Akkermansia_muciniphila	P5-2	P7-1	0
Akkermansia_muciniphila	GE7-2-T0	NL1-1-T0	5			Akkermansia_muciniphila	P54-2	P7-1	0
Akkermansia_muciniphila	GE7-2-T7	NL1-1-T28	5			Akkermansia_muciniphila	P54-2	P7-2	0
Akkermansia_muciniphila	GE7-2-T7	NL1-1-T0	5			Akkermansia_muciniphila	P29-1	P82-2	0
Akkermansia_muciniphila	NL1-1-T28	GE7-2-T30	5			Akkermansia_muciniphila	P82-1	P82-2	0
Akkermansia_muciniphila	NL1-1-T0	GE7-2-T30	5			Akkermansia_muciniphila	P82-2	P97-2	0
Akkermansia_muciniphila	NL1-1-T28	NL1-2-T7	4			Akkermansia_muciniphila	P29-2	P82-2	0
Akkermansia_muciniphila	NL1-1-T28	NL1-2-T28	4			Akkermansia_muciniphila	P5-1	P82-2	0
Akkermansia_muciniphila	NL1-1-T0	NL1-2-T7	4			Akkermansia_muciniphila	P54-2	P82-2	0
Akkermansia_muciniphila	NL1-1-T0	NL1-2-T28	4			Akkermansia_muciniphila	P54-1	P7-1	0
Akkermansia_muciniphila	NL1-2-T0	GE4-2-T30	4			Akkermansia_muciniphila	P54-1	P7-2	0
Akkermansia_muciniphila	NL1-2-T7	GE4-2-T30	4			Akkermansia_muciniphila	P29-1	P54-1	0
Akkermansia_muciniphila	NL1-2-T28	GE4-2-T30	4			Akkermansia_muciniphila	P5-1	P54-1	0
Akkermansia_muciniphila	NL1-2-T0	NL1-1-T28	3			Akkermansia_muciniphila	P5-2	P54-1	0
Akkermansia_muciniphila	NL1-2-T0	NL1-1-T0	3			Akkermansia_muciniphila	P54-1	P54-2	0
Akkermansia_muciniphila	GE7-2-T0	NL1-2-T0	3			Akkermansia_muciniphila	P54-1	P82-1	0
Akkermansia_muciniphila	GE7-2-T7	NL1-2-T0	3			Akkermansia_muciniphila	P29-2	P54-1	0
Akkermansia_muciniphila	GE7-2-T0	NL1-2-T7	3			Akkermansia_muciniphila	P54-1	P82-2	0
Akkermansia_muciniphila	GE7-2-T0	NL1-2-T28	3			Akkermansia_muciniphila	P54-1	P97-2	0
Akkermansia_muciniphila	GE7-2-T7	NL1-2-T7	3			Alistipes_onderdonkii	P97-1	P97-2	97
Akkermansia_muciniphila	GE7-2-T7	NL1-2-T28	3			Alistipes_onderdonkii	P29-2	P82-2	79
Akkermansia_muciniphila	GE7-2-T30	NL1-2-T7	3			Alistipes_onderdonkii	P47-1	P53-1	76
Akkermansia_muciniphila	GE7-2-T30	NL1-2-T28	3			Alistipes_onderdonkii	P53-1	P82-2	53
Akkermansia_muciniphila	NL1-2-T0	GE7-2-T30	3			Alistipes_onderdonkii	P47-1	P82-2	52
Akkermansia_muciniphila	GE4-2-T7	NL1-1-T7	2			Alistipes_onderdonkii	P29-2	P53-1	50
Akkermansia_muciniphila	GE4-1-T7	NL1-1-T7	2			Alistipes_onderdonkii	P29-2	P47-1	49
Akkermansia_muciniphila	GE4-1-T30	NL1-1-T7	2			Alistipes_onderdonkii	P54-1	P7-1	40
Akkermansia_muciniphila	GE4-2-T0	NL1-1-T7	2			Alistipes_onderdonkii	P5-1	P97-2	38
Akkermansia_muciniphila	GE7-1-T0	NL1-1-T7	2			Alistipes_onderdonkii	P5-1	P97-1	34
Akkermansia_muciniphila	GE4-1-T7	NL1-2-T7	1			Alistipes_onderdonkii	P47-1	P54-1	32
Akkermansia_muciniphila	GE4-1-T7	NL1-2-T28	1			Alistipes_onderdonkii	P47-1	P7-1	30
Akkermansia_muciniphila	GE4-1-T30	NL1-2-T7	1			Alistipes_onderdonkii	P53-1	P54-1	29
Akkermansia_muciniphila	GE4-1-T30	NL1-2-T28	1			Alistipes_onderdonkii	P54-1	P82-1	29
Akkermansia_muciniphila	GE4-2-T0	NL1-2-T7	1			Alistipes_onderdonkii	P47-1	P82-1	25
Akkermansia_muciniphila	GE4-2-T0	NL1-2-T28	1			Alistipes_onderdonkii	P53-1	P7-1	25
Akkermansia_muciniphila	GE7-2-T0	GE7-1-T0	1			Alistipes_onderdonkii	P29-2	P54-1	25
Akkermansia_muciniphila	GE7-2-T7	GE7-1-T0	1			Alistipes_onderdonkii	P54-1	P82-2	25
Akkermansia_muciniphila	NL1-1-T28	GE4-1-T7	1			Alistipes_onderdonkii	P5-2	P54-1	24
Akkermansia_muciniphila	NL1-1-T28	GE4-1-T30	1			Alistipes_onderdonkii	P7-1	P82-2	21
Akkermansia_muciniphila	NL1-1-T28	GE4-2-T0	1			Alistipes_onderdonkii	P7-1	P82-1	20
Akkermansia_muciniphila	NL1-1-T28	GE4-2-T7	1			Alistipes_onderdonkii	P29-2	P7-1	20
Akkermansia_muciniphila	NL1-1-T0	GE4-1-T7	1			Alistipes_onderdonkii	P82-1	P82-2	19
Akkermansia_muciniphila	NL1-1-T0	GE4-1-T30	1			Alistipes_onderdonkii	P53-1	P82-1	17
Akkermansia_muciniphila	NL1-1-T0	GE4-2-T0	1			Alistipes_onderdonkii	P5-1	P54-1	17
Akkermansia_muciniphila	NL1-1-T0	GE4-2-T7	1			Alistipes_onderdonkii	P29-2	P82-1	16
Akkermansia_muciniphila	GE7-1-T0	GE7-2-T30	1			Alistipes_onderdonkii	P53-1	P97-2	16
Akkermansia_muciniphila	GE7-2-T0	GE4-1-T7	1			Alistipes_onderdonkii	P29-1	P7-1	16
Akkermansia_muciniphila	GE7-2-T0	GE4-1-T30	1			Alistipes_onderdonkii	P29-1	P47-1	16
Akkermansia_muciniphila	GE7-2-T0	GE4-2-T0	1			Alistipes_onderdonkii	P47-1	P97-2	15
Akkermansia_muciniphila	GE7-2-T0	GE4-2-T7	1			Alistipes_onderdonkii	P47-2	P5-1	15
Akkermansia_muciniphila	NL1-2-T7	GE4-2-T7	1			Alistipes_onderdonkii	P47-2	P54-1	15
Akkermansia_muciniphila	NL1-2-T28	GE4-2-T7	1			Alistipes_onderdonkii	P53-1	P97-1	14
Akkermansia_muciniphila	GE7-2-T7	GE4-1-T7	1			Alistipes_onderdonkii	P47-2	P97-2	14
Akkermansia_muciniphila	GE7-2-T7	GE4-1-T30	1			Alistipes_onderdonkii	P54-1	P97-2	14
Akkermansia_muciniphila	GE7-2-T7	GE4-2-T0	1			Alistipes_onderdonkii	P47-1	P97-1	13
Akkermansia_muciniphila	GE7-1-T0	NL1-1-T0	1			Alistipes_onderdonkii	P82-2	P97-2	13
Akkermansia_muciniphila	GE7-1-T0	NL1-2-T7	1			Alistipes_onderdonkii	P29-1	P82-1	13
Akkermansia_muciniphila	GE7-1-T0	NL1-2-T28	1			Alistipes_onderdonkii	P54-1	P97-1	12
Akkermansia_muciniphila	GE7-2-T7	GE4-2-T7	1			Alistipes_onderdonkii	P29-1	P29-2	12
Akkermansia_muciniphila	NL1-2-T0	GE4-1-T7	1			Alistipes_onderdonkii	P29-1	P97-1	12
Akkermansia_muciniphila	NL1-2-T0	GE4-1-T30	1			Alistipes_onderdonkii	P29-1	P5-2	12
Akkermansia_muciniphila	NL1-2-T0	GE4-2-T0	1			Alistipes_onderdonkii	P29-1	P82-2	12
Akkermansia_muciniphila	NL1-2-T0	GE4-2-T7	1			Alistipes_onderdonkii	P29-2	P97-2	11
Akkermansia_muciniphila	GE7-2-T30	GE4-1-T7	1			Alistipes_onderdonkii	P47-2	P97-1	11
Akkermansia_muciniphila	GE7-2-T30	GE4-1-T30	1			Alistipes_onderdonkii	P29-1	P53-1	11
Akkermansia_muciniphila	GE7-2-T30	GE4-2-T0	1			Alistipes_onderdonkii	P5-2	P7-1	10
Akkermansia_muciniphila	GE7-2-T30	GE4-2-T7	1			Alistipes_onderdonkii	P82-2	P97-1	10
Akkermansia_muciniphila	NL1-2-T0	GE7-1-T0	1			Alistipes_onderdonkii	P47-1	P47-2	10
Akkermansia_muciniphila	NL1-1-T28	GE7-1-T0	1			Alistipes_onderdonkii	P29-2	P97-1	9
Alistipes_onderdonkii	GE4-1-T7	GE4-1-T30	100			Alistipes_onderdonkii	P47-2	P5-2	9
Alistipes_onderdonkii	GE4-2-T0	GE4-2-T7	100			Alistipes_onderdonkii	P47-2	P7-1	9
Alistipes_onderdonkii	GE4-2-T0	GE4-2-T30	100			Alistipes_onderdonkii	P7-1	P97-2	8
Alistipes_onderdonkii	GE4-2-T7	GE4-2-T30	100			Alistipes_onderdonkii	P82-1	P97-2	8
Alistipes_onderdonkii	GE7-2-T7	GE7-2-T0	100			Alistipes_onderdonkii	P47-2	P82-1	8
Alistipes_onderdonkii	GE7-2-T30	GE7-2-T7	100			Alistipes_onderdonkii	P29-2	P47-2	8
Alistipes_onderdonkii	GE7-2-T30	GE7-1-T7	100			Alistipes_onderdonkii	P47-2	P82-2	8
Alistipes_onderdonkii	GE7-2-T30	GE7-2-T0	100			Alistipes_onderdonkii	P5-1	P5-2	7
Alistipes_onderdonkii	GE7-2-T7	GE7-1-T7	100			Alistipes_onderdonkii	P47-2	P53-1	7
Alistipes_onderdonkii	GE7-1-T7	GE7-2-T0	100			Alistipes_onderdonkii	P5-2	P97-2	6
Alistipes_onderdonkii	GE7-2-T30	GE7-1-T0	100			Alistipes_onderdonkii	P7-1	P97-1	6
Alistipes_onderdonkii	GE7-2-T7	GE7-1-T0	100			Alistipes_onderdonkii	P47-1	P5-2	6
Alistipes_onderdonkii	GE7-1-T7	GE7-1-T0	100			Alistipes_onderdonkii	P5-1	P82-1	5
Alistipes_onderdonkii	GE7-2-T0	GE7-1-T0	100			Alistipes_onderdonkii	P5-2	P53-1	5
Alistipes_onderdonkii	GE3-1-T7	GE3-1-T0	100			Alistipes_onderdonkii	P5-1	P7-1	5
Alistipes_onderdonkii	GE3-1-T7	GE3-1-T30	99			Alistipes_onderdonkii	P29-2	P5-2	5
Alistipes_onderdonkii	GE7-2-T7	GE7-1-T30	98			Alistipes_onderdonkii	P5-2	P82-2	5
Alistipes_onderdonkii	GE7-2-T0	GE7-1-T30	98			Alistipes_onderdonkii	P5-2	P97-1	4
Alistipes_onderdonkii	GE4-1-T7	GE4-2-T30	97			Alistipes_onderdonkii	P5-2	P82-1	4
Alistipes_onderdonkii	GE7-1-T0	GE7-1-T30	97			Alistipes_onderdonkii	P82-1	P97-1	4
Alistipes_onderdonkii	GE7-2-T30	GE7-1-T30	95			Alistipes_onderdonkii	P47-1	P5-1	4
Alistipes_onderdonkii	GE7-1-T7	GE7-1-T30	95			Alistipes_onderdonkii	P5-1	P53-1	3
Alistipes_onderdonkii	GE4-1-T7	GE4-2-T0	94			Alistipes_onderdonkii	P29-2	P5-1	3
Alistipes_onderdonkii	GE4-1-T7	GE4-2-T7	94			Alistipes_onderdonkii	P5-1	P82-2	3
Alistipes_onderdonkii	GE4-1-T30	GE4-2-T30	94			Alistipes_putredinis	P97-1	P97-2	99
Alistipes_onderdonkii	GE4-2-T0	GE4-1-T30	92			Alistipes_putredinis	P47-1	P47-2	93
Alistipes_onderdonkii	GE4-2-T7	GE4-1-T30	92			Alistipes_putredinis	P29-1	P53-1	88
Alistipes_onderdonkii	GE4-1-T7	GE7-1-T0	85			Alistipes_putredinis	P47-2	P7-2	86
Alistipes_onderdonkii	GE4-1-T30	GE7-1-T0	83			Alistipes_putredinis	P47-2	P5-1	84
Alistipes_onderdonkii	GE4-2-T0	GE7-1-T0	82			Alistipes_putredinis	P47-2	P53-2	82
Alistipes_onderdonkii	GE4-2-T7	GE7-1-T0	82			Alistipes_putredinis	P5-1	P7-2	81
Alistipes_onderdonkii	GE4-2-T30	GE7-1-T0	82			Alistipes_putredinis	P47-2	P5-2	77
Alistipes_onderdonkii	GE4-1-T7	GE7-1-T7	81			Alistipes_putredinis	P5-1	P53-2	77
Alistipes_onderdonkii	GE7-2-T30	GE4-2-T0	80			Alistipes_putredinis	P53-2	P7-2	76
Alistipes_onderdonkii	GE7-2-T30	GE4-2-T7	80			Alistipes_putredinis	P29-2	P47-2	69
Alistipes_onderdonkii	GE7-2-T7	GE4-2-T30	80			Alistipes_putredinis	P5-2	P7-2	67
Alistipes_onderdonkii	GE7-2-T0	GE4-2-T30	80			Alistipes_putredinis	P5-1	P5-2	65
Alistipes_onderdonkii	GE7-2-T30	GE4-2-T30	80			Alistipes_putredinis	P82-1	P82-2	64
Alistipes_onderdonkii	GE7-1-T7	GE4-2-T30	80			Alistipes_putredinis	P5-2	P53-2	64
Alistipes_onderdonkii	GE4-1-T7	GE7-2-T7	80			Alistipes_putredinis	P47-2	P82-1	63
Alistipes_onderdonkii	GE4-1-T7	GE7-2-T0	80			Alistipes_putredinis	P29-2	P47-1	63
Alistipes_onderdonkii	GE4-2-T0	GE7-1-T7	80			Alistipes_putredinis	P5-2	P54-2	61
Alistipes_onderdonkii	GE4-2-T7	GE7-1-T7	80			Alistipes_putredinis	P47-2	P82-2	60
Alistipes_onderdonkii	GE4-2-T7	GE7-2-T0	80			Alistipes_putredinis	P5-2	P82-1	58
Alistipes_onderdonkii	GE4-1-T7	GE7-1-T30	80			Alistipes_putredinis	P5-2	P82-2	57
Alistipes_onderdonkii	GE4-1-T30	GE7-1-T30	80			Alistipes_putredinis	P82-2	P97-1	56
Alistipes_onderdonkii	GE4-2-T0	GE7-2-T7	79			Alistipes_putredinis	P82-2	P97-2	56
Alistipes_onderdonkii	GE4-2-T0	GE7-2-T0	79			Alistipes_putredinis	P82-1	P97-1	56
Alistipes_onderdonkii	GE4-2-T7	GE7-2-T7	79			Alistipes_putredinis	P82-1	P97-2	56
Alistipes_onderdonkii	GE4-1-T7	GE7-2-T30	79			Alistipes_putredinis	P47-2	P97-1	55
Alistipes_onderdonkii	GE4-2-T30	GE7-1-T30	79			Alistipes_putredinis	P47-2	P97-2	55
Alistipes_onderdonkii	GE7-2-T7	GE4-1-T30	78			Alistipes_putredinis	P5-2	P97-1	53
Alistipes_onderdonkii	GE7-2-T0	GE4-1-T30	78			Alistipes_putredinis	P5-2	P97-2	53
Alistipes_onderdonkii	GE7-1-T7	GE4-1-T30	78			Alistipes_putredinis	P47-2	P7-1	51
Alistipes_onderdonkii	GE4-1-T7	GE3-2-T7	78			Alistipes_putredinis	P7-2	P82-1	50
Alistipes_onderdonkii	GE4-2-T0	GE7-1-T30	78			Alistipes_putredinis	P7-2	P82-2	49
Alistipes_onderdonkii	GE4-2-T7	GE7-1-T30	78			Alistipes_putredinis	P53-2	P82-1	49
Alistipes_onderdonkii	GE7-2-T30	GE4-1-T30	77			Alistipes_putredinis	P5-1	P82-1	47
Alistipes_onderdonkii	GE4-1-T30	GE3-2-T7	70			Alistipes_putredinis	P53-2	P82-2	47
Alistipes_onderdonkii	GE3-2-T7	GE7-1-T30	36			Alistipes_putredinis	P5-1	P82-2	46
Alistipes_onderdonkii	GE3-2-T7	GE7-1-T0	35			Alistipes_putredinis	P47-1	P5-2	46
Alistipes_onderdonkii	GE4-2-T30	GE3-2-T7	34			Alistipes_putredinis	P7-2	P97-1	45
Alistipes_onderdonkii	GE4-2-T0	GE3-2-T7	33			Alistipes_putredinis	P7-2	P97-2	45
Alistipes_onderdonkii	GE4-2-T7	GE3-2-T7	33			Alistipes_putredinis	P29-2	P5-2	44
Alistipes_onderdonkii	GE7-2-T7	GE3-2-T7	32			Alistipes_putredinis	P53-2	P97-1	43
Alistipes_onderdonkii	GE7-2-T0	GE3-2-T7	32			Alistipes_putredinis	P53-2	P97-2	43
Alistipes_onderdonkii	GE7-2-T30	GE3-2-T7	31			Alistipes_putredinis	P5-1	P97-1	42
Alistipes_onderdonkii	GE7-1-T7	GE3-2-T7	31			Alistipes_putredinis	P5-1	P97-2	42
Alistipes_onderdonkii	GE7-2-T7	GE3-2-T0	21			Alistipes_putredinis	P5-2	P7-1	42
Alistipes_onderdonkii	GE7-2-T0	GE3-2-T0	17			Alistipes_putredinis	P47-1	P7-2	41
Alistipes_onderdonkii	GE4-1-T30	GE3-1-T30	14			Alistipes_putredinis	P7-1	P82-1	40
Alistipes_onderdonkii	GE7-1-T30	GE3-1-T30	14			Alistipes_putredinis	P47-1	P5-1	39
Alistipes_onderdonkii	GE4-1-T7	GE3-1-T30	13			Alistipes_putredinis	P47-1	P53-2	39
Alistipes_onderdonkii	GE4-1-T30	GE3-2-T0	12			Alistipes_putredinis	P29-2	P7-1	38
Alistipes_onderdonkii	GE4-1-T30	GE3-1-T0	11			Alistipes_putredinis	P47-1	P7-1	38
Alistipes_onderdonkii	GE4-1-T7	GE3-2-T0	11			Alistipes_putredinis	P47-1	P82-1	37
Alistipes_onderdonkii	GE7-2-T7	GE3-1-T30	11			Alistipes_putredinis	P7-1	P82-2	37
Alistipes_onderdonkii	GE7-2-T0	GE3-1-T30	11			Alistipes_putredinis	P29-2	P5-1	36
Alistipes_onderdonkii	GE4-1-T7	GE3-1-T0	10			Alistipes_putredinis	P47-1	P82-2	36
Alistipes_onderdonkii	GE4-2-T30	GE3-1-T30	10			Alistipes_putredinis	P29-2	P7-2	36
Alistipes_onderdonkii	GE4-2-T30	GE3-2-T0	10			Alistipes_putredinis	P29-2	P53-2	36
Alistipes_onderdonkii	GE7-1-T30	GE3-1-T0	10			Alistipes_putredinis	P29-2	P82-2	35
Alistipes_onderdonkii	GE7-1-T0	GE3-1-T30	10			Alistipes_putredinis	P29-2	P82-1	35
Alistipes_onderdonkii	GE7-1-T0	GE3-2-T0	10			Alistipes_putredinis	P7-1	P97-1	35
Alistipes_onderdonkii	GE4-2-T0	GE3-1-T30	9			Alistipes_putredinis	P7-1	P97-2	34
Alistipes_onderdonkii	GE4-2-T7	GE3-1-T30	9			Alistipes_putredinis	P29-1	P5-2	34
Alistipes_onderdonkii	GE4-2-T0	GE3-2-T0	9			Alistipes_putredinis	P5-2	P53-1	34
Alistipes_onderdonkii	GE4-2-T7	GE3-2-T0	9			Alistipes_putredinis	P7-1	P7-2	32
Alistipes_onderdonkii	GE7-2-T30	GE3-1-T30	9			Alistipes_putredinis	P29-2	P97-2	32
Alistipes_onderdonkii	GE7-2-T30	GE3-2-T0	9			Alistipes_putredinis	P29-2	P97-1	31
Alistipes_onderdonkii	GE7-1-T7	GE3-2-T0	9			Alistipes_putredinis	P47-1	P97-1	31
Alistipes_onderdonkii	GE3-2-T7	GE3-1-T30	9			Alistipes_putredinis	P47-1	P97-2	31
Alistipes_onderdonkii	GE3-2-T7	GE3-2-T0	9			Alistipes_putredinis	P53-2	P7-1	31
Alistipes_onderdonkii	GE7-1-T0	GE3-1-T0	8			Alistipes_putredinis	P5-1	P7-1	27
Alistipes_onderdonkii	GE7-1-T7	GE3-1-T30	8			Alistipes_putredinis	P47-2	P53-1	25
Alistipes_onderdonkii	GE4-1-T7	GE3-1-T7	7			Alistipes_putredinis	P29-1	P47-2	24
Alistipes_onderdonkii	GE4-1-T30	GE3-1-T7	7			Alistipes_putredinis	P47-2	P54-2	24
Alistipes_onderdonkii	GE4-2-T30	GE3-1-T0	7			Alistipes_putredinis	P53-1	P54-2	24
Alistipes_onderdonkii	GE7-2-T7	GE3-1-T0	7			Alistipes_putredinis	P29-1	P54-2	23
Alistipes_onderdonkii	GE7-2-T0	GE3-1-T0	7			Alistipes_putredinis	P29-1	P29-2	16
Alistipes_onderdonkii	GE3-1-T7	GE7-1-T30	7			Alistipes_putredinis	P29-1	P53-2	16
Alistipes_onderdonkii	GE4-2-T0	GE3-1-T0	6			Alistipes_putredinis	P47-1	P53-1	16
Alistipes_onderdonkii	GE4-2-T7	GE3-1-T0	6			Alistipes_putredinis	P53-1	P7-2	16
Alistipes_onderdonkii	GE7-2-T30	GE3-1-T0	6			Alistipes_putredinis	P29-1	P7-2	16
Alistipes_onderdonkii	GE7-1-T7	GE3-1-T0	6			Alistipes_putredinis	P53-1	P53-2	16
Alistipes_onderdonkii	GE3-2-T7	GE3-1-T0	6			Alistipes_putredinis	P54-2	P7-1	16
Alistipes_onderdonkii	GE7-2-T7	GE3-1-T7	5			Alistipes_putredinis	P29-1	P82-2	15
Alistipes_onderdonkii	GE7-2-T0	GE3-1-T7	5			Alistipes_putredinis	P53-1	P82-1	15
Alistipes_onderdonkii	GE3-1-T7	GE7-1-T0	5			Alistipes_putredinis	P29-1	P47-1	15
Alistipes_onderdonkii	GE4-2-T0	GE3-1-T7	4			Alistipes_putredinis	P29-1	P82-1	15
Alistipes_onderdonkii	GE4-2-T30	GE3-1-T7	4			Alistipes_putredinis	P29-2	P53-1	15
Alistipes_onderdonkii	GE4-2-T7	GE3-1-T7	3			Alistipes_putredinis	P53-1	P7-1	15
Alistipes_onderdonkii	GE7-2-T30	GE3-1-T7	3			Alistipes_putredinis	P5-1	P54-2	15
Alistipes_onderdonkii	GE7-1-T7	GE3-1-T7	3			Alistipes_putredinis	P54-2	P7-2	15
Alistipes_onderdonkii	GE3-2-T7	GE3-1-T7	2			Alistipes_putredinis	P54-2	P82-1	15
Alistipes_putredinis	GE4-2-T7	GE4-2-T0	100			Alistipes_putredinis	P29-1	P5-1	14
Alistipes_putredinis	GE3-2-T7	GE3-2-T30	100			Alistipes_putredinis	P5-1	P53-1	14
Alistipes_putredinis	GE3-1-T7	GE3-1-T30	100			Alistipes_putredinis	P53-1	P82-2	14
Alistipes_putredinis	NL1-1-T28	NL1-1-T7	100			Alistipes_putredinis	P29-1	P7-1	14
Alistipes_putredinis	NL1-1-T28	NL1-1-T0	100			Alistipes_putredinis	P29-2	P54-2	14
Alistipes_putredinis	GE4-2-T7	GE4-1-T30	100			Alistipes_putredinis	P47-1	P54-2	14
Alistipes_putredinis	GE4-2-T7	GE4-1-T7	100			Alistipes_putredinis	P53-2	P54-2	14
Alistipes_putredinis	GE4-2-T7	GE4-2-T30	100			Alistipes_putredinis	P54-2	P97-1	13
Alistipes_putredinis	GE4-2-T0	GE4-1-T30	100			Alistipes_putredinis	P54-2	P97-2	13
Alistipes_putredinis	GE4-2-T0	GE4-2-T30	100			Alistipes_putredinis	P54-2	P82-2	13
Alistipes_putredinis	NL1-1-T7	NL1-1-T0	100			Alistipes_putredinis	P29-1	P97-1	12
Alistipes_putredinis	GE3-1-T7	GE3-1-T0	100			Alistipes_putredinis	P29-1	P97-2	12
Alistipes_putredinis	GE3-1-T30	GE3-1-T0	100			Alistipes_putredinis	P53-1	P97-2	12
Alistipes_putredinis	GE4-2-T0	GE4-1-T7	100			Alistipes_putredinis	P53-1	P97-1	12
Alistipes_putredinis	GE4-1-T30	GE4-1-T7	100			Alistipes_shahii	P53-1	P53-2	98
Alistipes_putredinis	NL1-2-T7	NL1-2-T28	100			Alistipes_shahii	P29-2	P54-1	78
Alistipes_putredinis	GE4-1-T30	GE4-2-T30	100			Alistipes_shahii	P29-1	P47-1	46
Alistipes_putredinis	GE4-1-T7	GE4-2-T30	100			Alistipes_shahii	P54-1	P82-1	39
Alistipes_putredinis	GE3-2-T0	GE3-1-T7	99			Alistipes_shahii	P29-1	P54-1	33
Alistipes_putredinis	GE3-2-T0	GE3-1-T30	99			Alistipes_shahii	P47-1	P54-1	30
Alistipes_putredinis	GE3-2-T0	GE3-1-T0	99			Alistipes_shahii	P29-2	P82-1	30
Alistipes_putredinis	NL1-1-T28	NL1-2-T7	98			Alistipes_shahii	P54-1	P97-1	26
Alistipes_putredinis	NL1-1-T28	NL1-2-T28	98			Alistipes_shahii	P5-2	P82-2	25
Alistipes_putredinis	NL1-2-T7	NL1-1-T7	98			Alistipes_shahii	P29-1	P29-2	23
Alistipes_putredinis	NL1-2-T28	NL1-1-T7	98			Alistipes_shahii	P29-2	P47-1	22
Alistipes_putredinis	NL1-2-T7	NL1-1-T0	98			Alistipes_shahii	P5-2	P54-1	21
Alistipes_putredinis	NL1-2-T28	NL1-1-T0	98			Alistipes_shahii	P54-1	P82-2	21
Alistipes_putredinis	GE4-1-T30	GE3-2-T30	82			Alistipes_shahii	P29-1	P82-1	21
Alistipes_putredinis	GE4-1-T7	GE3-2-T30	82			Alistipes_shahii	P97-1	P97-2	20
Alistipes_putredinis	GE3-2-T7	GE4-1-T30	81			Alistipes_shahii	P47-2	P54-1	19
Alistipes_putredinis	GE3-2-T7	GE4-1-T7	81			Alistipes_shahii	P53-1	P54-1	19
Alistipes_putredinis	GE3-2-T7	GE4-2-T30	80			Alistipes_shahii	P47-1	P82-1	18
Alistipes_putredinis	GE3-2-T30	GE4-2-T30	80			Alistipes_shahii	P53-2	P54-1	18
Alistipes_putredinis	GE4-2-T7	GE3-2-T30	80			Alistipes_shahii	P82-2	P97-1	18
Alistipes_putredinis	GE4-2-T0	GE3-2-T30	80			Alistipes_shahii	P29-1	P97-1	18
Alistipes_putredinis	GE3-2-T7	GE4-2-T7	79			Alistipes_shahii	P29-2	P97-1	17
Alistipes_putredinis	GE3-2-T7	GE4-2-T0	79			Alistipes_shahii	P47-2	P97-1	17
Alistipes_putredinis	GE4-2-T7	GE3-1-T0	47			Alistipes_shahii	P53-1	P97-1	17
Alistipes_putredinis	GE4-2-T0	GE3-1-T0	47			Alistipes_shahii	P53-2	P97-1	16
Alistipes_putredinis	GE4-1-T30	GE3-1-T0	47			Alistipes_shahii	P82-1	P97-1	16
Alistipes_putredinis	GE4-1-T7	GE3-1-T7	47			Alistipes_shahii	P82-1	P82-2	15
Alistipes_putredinis	GE4-1-T7	GE3-1-T0	47			Alistipes_shahii	P5-1	P97-1	15
Alistipes_putredinis	GE4-2-T30	GE3-1-T0	47			Alistipes_shahii	P47-1	P97-1	15
Alistipes_putredinis	GE3-2-T0	GE4-2-T30	47			Alistipes_shahii	P5-2	P97-1	15
Alistipes_putredinis	GE3-1-T7	GE4-2-T30	47			Alistipes_shahii	P5-2	P82-1	14
Alistipes_putredinis	GE3-1-T30	GE4-2-T30	47			Alistipes_shahii	P53-1	P82-1	14
Alistipes_putredinis	GE4-2-T7	GE3-2-T0	46			Alistipes_shahii	P29-2	P82-2	13
Alistipes_putredinis	GE4-2-T7	GE3-1-T7	46			Alistipes_shahii	P29-1	P82-2	13
Alistipes_putredinis	GE4-2-T7	GE3-1-T30	46			Alistipes_shahii	P5-2	P53-1	13
Alistipes_putredinis	GE4-2-T0	GE3-2-T0	46			Alistipes_shahii	P47-2	P82-1	13
Alistipes_putredinis	GE4-2-T0	GE3-1-T7	46			Alistipes_shahii	P53-2	P82-1	13
Alistipes_putredinis	GE4-2-T0	GE3-1-T30	46			Alistipes_shahii	P29-1	P5-2	12
Alistipes_putredinis	GE4-1-T30	GE3-2-T0	46			Alistipes_shahii	P29-1	P53-1	12
Alistipes_putredinis	GE4-1-T30	GE3-1-T7	46			Alistipes_shahii	P5-2	P53-2	12
Alistipes_putredinis	GE4-1-T30	GE3-1-T30	46			Alistipes_shahii	P29-2	P5-2	11
Alistipes_putredinis	GE4-1-T7	GE3-1-T30	46			Alistipes_shahii	P47-1	P5-2	11
Alistipes_putredinis	GE3-2-T7	GE3-1-T0	46			Alistipes_shahii	P47-1	P82-2	11
Alistipes_putredinis	GE3-1-T7	GE3-2-T30	46			Alistipes_shahii	P29-1	P47-2	11
Alistipes_putredinis	GE3-2-T30	GE3-1-T30	46			Alistipes_shahii	P29-2	P47-2	11
Alistipes_putredinis	GE3-2-T30	GE3-1-T0	46			Alistipes_shahii	P29-2	P53-1	11
Alistipes_putredinis	GE3-2-T0	GE4-1-T7	46			Alistipes_shahii	P47-1	P53-1	11
Alistipes_putredinis	GE3-2-T7	GE3-1-T7	45			Alistipes_shahii	P5-1	P54-1	11
Alistipes_putredinis	GE3-2-T7	GE3-1-T30	45			Alistipes_shahii	P53-1	P82-2	10
Alistipes_putredinis	GE3-2-T0	GE3-2-T30	45			Alistipes_shahii	P47-1	P47-2	10
Alistipes_putredinis	GE3-2-T7	GE3-2-T0	44			Alistipes_shahii	P29-1	P53-2	10
Alistipes_putredinis	NL1-1-T0	GE3-1-T0	40			Alistipes_shahii	P29-2	P53-2	10
Alistipes_putredinis	GE3-1-T30	NL1-1-T0	39			Alistipes_shahii	P47-2	P82-2	9
Alistipes_putredinis	NL1-1-T7	GE3-1-T0	39			Alistipes_shahii	P47-2	P53-1	9
Alistipes_putredinis	GE3-2-T0	NL1-1-T0	38			Alistipes_shahii	P53-2	P82-2	9
Alistipes_putredinis	GE3-1-T7	NL1-1-T0	38			Alistipes_shahii	P47-1	P53-2	9
Alistipes_putredinis	NL1-1-T28	GE3-1-T0	38			Alistipes_shahii	P47-2	P5-2	8
Alistipes_putredinis	NL1-2-T7	GE3-1-T0	38			Alistipes_shahii	P47-2	P53-2	8
Alistipes_putredinis	NL1-2-T28	GE3-1-T0	38			Alistipes_shahii	P5-1	P82-1	7
Alistipes_putredinis	GE3-2-T0	NL1-1-T7	37			Alistipes_shahii	P5-1	P5-2	5
Alistipes_putredinis	GE4-2-T0	NL1-1-T0	37			Alistipes_shahii	P5-1	P82-2	5
Alistipes_putredinis	GE4-2-T7	NL1-1-T0	37			Alistipes_shahii	P29-2	P5-1	5
Alistipes_putredinis	GE4-2-T30	NL1-1-T0	37			Alistipes_shahii	P29-1	P5-1	5
Alistipes_putredinis	GE4-1-T7	NL1-1-T0	37			Alistipes_shahii	P47-2	P5-1	5
Alistipes_putredinis	NL1-1-T28	GE3-1-T7	37			Alistipes_shahii	P47-1	P5-1	4
Alistipes_putredinis	NL1-1-T28	GE3-1-T30	37			Alistipes_shahii	P5-1	P53-1	4
Alistipes_putredinis	NL1-1-T7	GE3-1-T7	37			Alistipes_shahii	P5-1	P53-2	3
Alistipes_putredinis	NL1-1-T7	GE3-1-T30	37			Alistipes_shahii	P47-2	P97-2	2
Alistipes_putredinis	NL1-2-T7	GE3-1-T7	37			Alistipes_shahii	P82-2	P97-2	1
Alistipes_putredinis	NL1-2-T7	GE3-1-T30	37			Alistipes_shahii	P5-2	P97-2	1
Alistipes_putredinis	NL1-2-T28	GE3-1-T7	37			Alistipes_shahii	P29-2	P97-2	1
Alistipes_putredinis	NL1-2-T28	GE3-1-T30	37			Alistipes_shahii	P53-1	P97-2	1
Alistipes_putredinis	GE3-2-T0	NL1-2-T28	36			Alistipes_shahii	P29-1	P97-2	1
Alistipes_putredinis	GE4-2-T7	NL1-1-T7	36			Alistipes_shahii	P47-1	P97-2	1
Alistipes_putredinis	GE4-1-T30	NL1-1-T0	36			Alistipes_shahii	P5-1	P97-2	1
Alistipes_putredinis	NL1-1-T28	GE3-2-T0	36			Alistipes_shahii	P54-1	P97-2	1
Alistipes_putredinis	NL1-2-T7	GE3-2-T0	36			Alistipes_shahii	P82-1	P97-2	1
Alistipes_putredinis	NL1-1-T28	GE4-2-T30	36			Alistipes_shahii	P53-2	P97-2	1
Alistipes_putredinis	NL1-1-T7	GE4-2-T30	36			Bacteroides_cellulosilyticus	P29-2	P5-2	57
Alistipes_putredinis	NL1-1-T7	GE4-1-T7	36			Bacteroides_cellulosilyticus	P47-1	P97-1	17
Alistipes_putredinis	GE3-2-T30	NL1-1-T0	35			Bacteroides_cellulosilyticus	P47-1	P82-2	14
Alistipes_putredinis	GE4-2-T7	NL1-1-T28	35			Bacteroides_cellulosilyticus	P29-2	P47-1	13
Alistipes_putredinis	GE4-2-T0	NL1-1-T28	35			Bacteroides_cellulosilyticus	P82-2	P97-1	13
Alistipes_putredinis	GE4-2-T0	NL1-1-T7	35			Bacteroides_cellulosilyticus	P29-2	P97-1	11
Alistipes_putredinis	GE4-2-T7	NL1-2-T28	35			Bacteroides_cellulosilyticus	P29-2	P82-2	9
Alistipes_putredinis	GE4-2-T0	NL1-2-T28	35			Bacteroides_cellulosilyticus	P47-1	P54-1	9
Alistipes_putredinis	GE4-1-T30	NL1-1-T7	35			Bacteroides_cellulosilyticus	P54-1	P97-1	9
Alistipes_putredinis	NL1-2-T7	GE4-1-T7	35			Bacteroides_cellulosilyticus	P29-2	P54-1	6
Alistipes_putredinis	NL1-2-T7	GE4-2-T30	35			Bacteroides_cellulosilyticus	P29-1	P54-1	6
Alistipes_putredinis	NL1-2-T28	GE4-1-T7	35			Bacteroides_cellulosilyticus	P54-1	P82-2	5
Alistipes_putredinis	NL1-1-T28	GE4-1-T7	35			Bacteroides_cellulosilyticus	P29-1	P29-2	2
Alistipes_putredinis	NL1-2-T28	GE4-2-T30	35			Bacteroides_cellulosilyticus	P29-1	P5-2	2
Alistipes_putredinis	GE3-2-T7	NL1-1-T0	34			Bacteroides_cellulosilyticus	P5-2	P54-1	1
Alistipes_putredinis	GE3-2-T7	NL1-2-T7	34			Bacteroides_cellulosilyticus	P5-2	P97-1	1
Alistipes_putredinis	GE3-2-T7	NL1-2-T28	34			Bacteroides_cellulosilyticus	P29-1	P47-1	1
Alistipes_putredinis	GE4-2-T7	NL1-2-T7	34			Bacteroides_cellulosilyticus	P29-1	P97-1	1
Alistipes_putredinis	GE4-2-T0	NL1-2-T7	34			Bacteroides_cellulosilyticus	P5-2	P82-2	0
Alistipes_putredinis	GE4-1-T30	NL1-2-T7	34			Bacteroides_cellulosilyticus	P47-1	P5-2	0
Alistipes_putredinis	GE4-1-T30	NL1-2-T28	34			Bacteroides_cellulosilyticus	P29-1	P82-2	0
Alistipes_putredinis	NL1-2-T7	GE3-2-T30	34			Bacteroides_ovatus	P47-1	P47-2	84
Alistipes_putredinis	NL1-2-T28	GE3-2-T30	34			Bacteroides_ovatus	P47-2	P53-1	68
Alistipes_putredinis	NL1-1-T28	GE4-1-T30	34			Bacteroides_ovatus	P47-1	P5-1	61
Alistipes_putredinis	GE3-2-T7	NL1-1-T28	33			Bacteroides_ovatus	P47-2	P5-1	59
Alistipes_putredinis	GE3-2-T7	NL1-1-T7	33			Bacteroides_ovatus	P47-2	P5-2	46
Alistipes_putredinis	NL1-1-T28	GE3-2-T30	33			Bacteroides_ovatus	P47-2	P53-2	44
Alistipes_putredinis	NL1-1-T7	GE3-2-T30	33			Bacteroides_ovatus	P47-1	P5-2	43
Alistipes_putredinis	GE3-1-T7	GE4-1-T0	30			Bacteroides_ovatus	P47-1	P53-2	42
Alistipes_putredinis	GE3-2-T0	GE4-1-T0	30			Bacteroides_ovatus	P5-1	P53-1	40
Alistipes_putredinis	GE3-1-T30	GE4-1-T0	30			Bacteroides_ovatus	P5-1	P5-2	37
Alistipes_putredinis	GE3-1-T0	GE4-1-T0	29			Bacteroides_ovatus	P5-2	P53-2	35
Alistipes_putredinis	NL1-1-T0	GE4-1-T0	22			Bacteroides_ovatus	P47-1	P53-1	33
Alistipes_putredinis	NL1-2-T7	GE4-1-T0	22			Bacteroides_ovatus	P5-1	P53-2	28
Alistipes_putredinis	NL1-2-T28	GE4-1-T0	22			Bacteroides_ovatus	P54-2	P97-1	25
Alistipes_putredinis	NL1-1-T28	GE4-1-T0	21			Bacteroides_ovatus	P5-2	P53-1	24
Alistipes_putredinis	NL1-1-T7	GE4-1-T0	21			Bacteroides_ovatus	P53-2	P82-2	24
Alistipes_shahii	GE7-2-T7	GE7-2-T0	100			Bacteroides_ovatus	P54-1	P82-2	24
Alistipes_shahii	GE7-2-T7	GE7-2-T30	100			Bacteroides_ovatus	P47-1	P82-2	23
Alistipes_shahii	GE7-2-T7	GE7-1-T7	100			Bacteroides_ovatus	P5-2	P82-2	21
Alistipes_shahii	GE7-2-T7	GE7-1-T30	100			Bacteroides_ovatus	P53-1	P53-2	21
Alistipes_shahii	GE7-2-T30	GE7-2-T0	100			Bacteroides_ovatus	P53-2	P97-2	20
Alistipes_shahii	GE7-2-T0	GE7-1-T30	100			Bacteroides_ovatus	P82-2	P97-2	18
Alistipes_shahii	GE7-2-T30	GE7-1-T7	100			Bacteroides_ovatus	P29-1	P47-2	18
Alistipes_shahii	GE7-2-T30	GE7-1-T30	100			Bacteroides_ovatus	P29-1	P53-1	18
Alistipes_shahii	GE7-1-T7	GE7-2-T0	100			Bacteroides_ovatus	P97-1	P97-2	16
Alistipes_shahii	GE7-1-T7	GE7-1-T30	100			Bacteroides_ovatus	P47-1	P97-2	16
Alistipes_shahii	NL1-2-T0	NL1-2-T7	100			Bacteroides_ovatus	P5-2	P97-2	16
Alistipes_shahii	NL1-2-T0	NL1-2-T28	100			Bacteroides_ovatus	P29-1	P47-1	16
Alistipes_shahii	GE7-2-T7	GE7-1-T0	100			Bacteroides_ovatus	P47-2	P82-2	15
Alistipes_shahii	GE7-2-T30	GE7-1-T0	100			Bacteroides_ovatus	P53-2	P97-1	15
Alistipes_shahii	GE7-1-T7	GE7-1-T0	100			Bacteroides_ovatus	P29-1	P7-1	15
Alistipes_shahii	GE7-2-T0	GE7-1-T0	100			Bacteroides_ovatus	P82-2	P97-1	14
Alistipes_shahii	GE7-1-T30	GE7-1-T0	100			Bacteroides_ovatus	P29-2	P82-2	13
Alistipes_shahii	NL1-2-T7	NL1-2-T28	100			Bacteroides_ovatus	P47-2	P97-2	12
Alistipes_shahii	GE4-2-T0	GE4-2-T7	100			Bacteroides_ovatus	P29-2	P7-1	12
Alistipes_shahii	GE3-1-T7	GE3-2-T0	99			Bacteroides_ovatus	P54-1	P7-1	12
Alistipes_shahii	GE3-1-T7	GE3-1-T30	99			Bacteroides_ovatus	P54-1	P97-2	12
Alistipes_shahii	GE4-2-T0	GE4-1-T30	99			Bacteroides_ovatus	P5-1	P82-2	11
Alistipes_shahii	GE4-1-T7	GE4-1-T30	99			Bacteroides_ovatus	P29-1	P82-2	11
Alistipes_shahii	GE4-2-T0	GE4-1-T7	99			Bacteroides_ovatus	P47-1	P97-1	10
Alistipes_shahii	GE4-1-T30	GE4-2-T7	99			Bacteroides_ovatus	P5-2	P97-1	9
Alistipes_shahii	GE4-1-T7	GE4-2-T7	99			Bacteroides_ovatus	P54-1	P97-1	9
Alistipes_shahii	GE3-1-T7	GE3-1-T0	98			Bacteroides_ovatus	P29-2	P97-2	9
Alistipes_shahii	GE3-1-T30	GE3-1-T0	98			Bacteroides_ovatus	P29-2	P97-1	8
Alistipes_shahii	NL1-1-T28	NL1-1-T7	98			Bacteroides_ovatus	P47-2	P54-1	8
Alistipes_shahii	NL1-1-T28	NL1-1-T0	97			Bacteroides_ovatus	P53-1	P54-1	8
Alistipes_shahii	GE3-2-T0	GE3-1-T30	94			Bacteroides_ovatus	P47-2	P97-1	7
Alistipes_shahii	GE3-2-T0	GE3-1-T0	80			Bacteroides_ovatus	P53-1	P82-2	7
Alistipes_shahii	GE3-1-T30	NL1-1-T28	42			Bacteroides_ovatus	P47-1	P54-1	7
Alistipes_shahii	GE3-1-T7	NL1-1-T7	42			Bacteroides_ovatus	P5-1	P97-1	6
Alistipes_shahii	NL1-2-T7	NL1-1-T7	42			Bacteroides_ovatus	P5-1	P97-2	6
Alistipes_shahii	NL1-2-T28	NL1-1-T7	42			Bacteroides_ovatus	P47-2	P7-1	5
Alistipes_shahii	GE3-1-T30	NL1-1-T7	41			Bacteroides_ovatus	P53-1	P97-1	5
Alistipes_shahii	NL1-1-T28	GE3-1-T0	41			Bacteroides_ovatus	P53-1	P97-2	5
Alistipes_shahii	GE3-1-T7	NL1-1-T28	40			Bacteroides_ovatus	P47-1	P7-1	4
Alistipes_shahii	GE3-1-T7	NL1-1-T0	40			Bacteroides_ovatus	P5-2	P7-1	4
Alistipes_shahii	GE3-1-T30	NL1-1-T0	39			Bacteroides_ovatus	P29-1	P97-1	4
Alistipes_shahii	NL1-2-T0	NL1-1-T7	38			Bacteroides_ovatus	P5-1	P7-1	3
Alistipes_shahii	GE4-1-T7	GE3-1-T30	34			Bacteroides_ovatus	P53-1	P7-1	3
Alistipes_shahii	GE4-2-T7	GE3-1-T30	34			Bacteroides_ovatus	P29-1	P97-2	3
Alistipes_shahii	GE4-2-T0	GE3-1-T30	33			Bacteroides_ovatus	P7-1	P82-2	2
Alistipes_shahii	GE7-2-T7	GE3-1-T0	33			Bacteroides_ovatus	P53-2	P7-1	2
Alistipes_shahii	NL1-2-T7	NL1-1-T0	33			Bacteroides_ovatus	P54-2	P7-1	2
Alistipes_shahii	GE3-1-T7	GE4-1-T7	33			Bacteroides_ovatus	P7-1	P97-1	0
Alistipes_shahii	GE3-1-T7	GE4-2-T7	33			Bacteroides_ovatus	P7-1	P97-2	0
Alistipes_shahii	GE4-1-T30	GE3-1-T30	32			Bacteroides_sp_1_1_6	P97-1	P97-2	96
Alistipes_shahii	GE4-1-T30	GE3-1-T0	32			Bacteroides_sp_1_1_6	P7-1	P97-1	67
Alistipes_shahii	GE4-2-T0	GE3-1-T0	32			Bacteroides_sp_1_1_6	P7-1	P97-2	67
Alistipes_shahii	GE4-1-T7	GE3-1-T0	32			Bacteroides_sp_1_1_6	P47-1	P53-2	31
Alistipes_shahii	GE4-2-T7	GE3-1-T0	32			Bacteroides_sp_1_1_6	P82-1	P97-1	30
Alistipes_shahii	GE7-1-T7	GE3-1-T0	32			Bacteroides_sp_1_1_6	P82-1	P97-2	27
Alistipes_shahii	GE7-2-T0	GE3-1-T0	32			Bacteroides_sp_1_1_6	P53-2	P97-1	25
Alistipes_shahii	GE7-1-T30	GE3-1-T0	32			Bacteroides_sp_1_1_6	P54-1	P7-1	23
Alistipes_shahii	GE7-1-T0	GE3-1-T30	31			Bacteroides_sp_1_1_6	P7-1	P82-1	22
Alistipes_shahii	GE7-2-T30	GE3-1-T0	31			Bacteroides_sp_1_1_6	P53-2	P97-2	20
Alistipes_shahii	GE7-1-T0	GE3-1-T0	31			Bacteroides_sp_1_1_6	P53-2	P7-1	19
Alistipes_shahii	NL1-2-T28	NL1-1-T0	31			Bacteroides_sp_1_1_6	P47-2	P82-1	19
Alistipes_shahii	GE7-2-T0	GE3-1-T30	30			Bacteroides_sp_1_1_6	P54-1	P97-1	19
Alistipes_shahii	GE7-1-T30	GE3-1-T30	30			Bacteroides_sp_1_1_6	P53-2	P82-1	18
Alistipes_shahii	NL1-2-T28	NL1-1-T28	30			Bacteroides_sp_1_1_6	P5-1	P7-1	17
Alistipes_shahii	NL1-2-T0	NL1-1-T0	30			Bacteroides_sp_1_1_6	P54-1	P82-1	17
Alistipes_shahii	GE3-1-T7	GE4-2-T0	30			Bacteroides_sp_1_1_6	P54-1	P97-2	15
Alistipes_shahii	GE3-1-T7	GE7-1-T0	30			Bacteroides_sp_1_1_6	P5-1	P97-1	14
Alistipes_shahii	NL1-2-T7	NL1-1-T28	29			Bacteroides_sp_1_1_6	P5-1	P97-2	12
Alistipes_shahii	GE7-2-T7	GE3-1-T30	29			Bacteroides_sp_1_1_6	P5-1	P82-1	11
Alistipes_shahii	GE3-1-T7	GE4-1-T30	29			Bacteroides_sp_1_1_6	P29-1	P82-1	9
Alistipes_shahii	GE3-2-T0	NL1-1-T0	28			Bacteroides_sp_1_1_6	P47-1	P47-2	8
Alistipes_shahii	GE7-2-T30	GE3-1-T30	28			Bacteroides_sp_1_1_6	P47-1	P54-1	6
Alistipes_shahii	GE7-1-T7	GE3-1-T30	28			Bacteroides_sp_1_1_6	P47-1	P5-1	3
Alistipes_shahii	GE3-2-T0	NL1-1-T7	27			Bacteroides_sp_1_1_6	P29-1	P47-1	3
Alistipes_shahii	GE4-1-T30	NL1-1-T7	27			Bacteroides_sp_1_1_6	P47-1	P7-1	1
Alistipes_shahii	GE4-1-T7	NL1-1-T7	27			Bacteroides_sp_1_1_6	P47-1	P82-1	1
Alistipes_shahii	GE4-2-T7	NL1-1-T7	27			Bacteroides_sp_1_1_6	P47-1	P97-1	1
Alistipes_shahii	NL1-2-T28	GE3-1-T0	27			Bacteroides_sp_1_1_6	P47-1	P97-2	1
Alistipes_shahii	GE3-1-T7	GE7-2-T0	27			Bacteroides_sp_2_1_16	P47-2	P82-1	13
Alistipes_shahii	GE3-1-T7	GE7-1-T30	27			Bacteroides_sp_2_1_16	P47-2	P97-2	16
Alistipes_shahii	GE3-1-T30	NL1-2-T28	26			Bacteroides_sp_2_1_16	P82-1	P97-2	10
Alistipes_shahii	GE4-1-T30	NL1-1-T0	26			Bacteroides_sp_2_1_16	P7-1	P82-1	17
Alistipes_shahii	GE4-2-T0	NL1-1-T7	26			Bacteroides_sp_2_1_16	P7-1	P97-2	19
Alistipes_shahii	GE4-2-T0	NL1-1-T0	26			Bacteroides_sp_2_1_16	P47-2	P7-1	25
Alistipes_shahii	GE4-1-T7	NL1-1-T0	26			Bacteroides_stercoris	P29-1	P82-2	50
Alistipes_shahii	GE4-2-T7	NL1-1-T0	26			Bacteroides_stercoris	P47-2	P54-2	40
Alistipes_shahii	GE7-2-T7	GE3-1-T7	26			Bacteroides_stercoris	P53-1	P54-2	24
Alistipes_shahii	NL1-2-T7	GE3-1-T0	26			Bacteroides_stercoris	P47-2	P53-2	18
Alistipes_shahii	GE7-2-T7	NL1-1-T7	25			Bacteroides_stercoris	P29-2	P53-1	15
Alistipes_shahii	GE7-2-T0	NL1-1-T7	25			Bacteroides_stercoris	P53-1	P53-2	15
Alistipes_shahii	GE7-1-T30	NL1-1-T7	25			Bacteroides_stercoris	P53-1	P97-1	13
Alistipes_shahii	GE7-1-T0	NL1-1-T7	25			Bacteroides_stercoris	P54-2	P97-1	12
Alistipes_shahii	GE7-2-T7	GE4-2-T7	25			Bacteroides_stercoris	P29-2	P54-2	11
Alistipes_shahii	GE7-2-T0	GE4-2-T7	25			Bacteroides_stercoris	P47-2	P53-1	10
Alistipes_shahii	GE7-1-T0	GE4-2-T7	25			Bacteroides_stercoris	P29-2	P97-1	5
Alistipes_shahii	GE7-1-T7	GE3-1-T7	25			Bacteroides_stercoris	P53-2	P97-1	5
Alistipes_shahii	GE3-1-T7	NL1-2-T28	24			Bacteroides_stercoris	P29-2	P53-2	5
Alistipes_shahii	GE3-1-T30	NL1-2-T7	24			Bacteroides_stercoris	P29-1	P29-2	4
Alistipes_shahii	GE4-2-T7	NL1-1-T28	24			Bacteroides_stercoris	P29-2	P47-2	2
Alistipes_shahii	GE7-2-T30	NL1-1-T7	24			Bacteroides_stercoris	P29-1	P47-2	2
Alistipes_shahii	GE7-1-T7	NL1-1-T7	24			Bacteroides_stercoris	P53-1	P82-2	2
Alistipes_shahii	GE7-2-T0	NL1-1-T0	24			Bacteroides_stercoris	P53-2	P82-2	2
Alistipes_shahii	GE7-1-T0	NL1-1-T0	24			Bacteroides_stercoris	P47-2	P97-1	1
Alistipes_shahii	NL1-2-T0	NL1-1-T28	24			Bacteroides_stercoris	P29-1	P97-1	1
Alistipes_shahii	GE7-2-T0	GE4-1-T7	24			Bacteroides_stercoris	P29-1	P53-2	1
Alistipes_shahii	GE7-2-T30	GE4-2-T7	24			Bacteroides_stercoris	P47-2	P82-2	1
Alistipes_shahii	GE7-1-T7	GE4-2-T7	24			Bacteroides_stercoris	P82-2	P97-1	1
Alistipes_shahii	GE7-2-T30	GE3-1-T7	24			Bacteroides_stercoris	P29-2	P82-2	1
Alistipes_shahii	GE4-1-T7	GE7-1-T0	24			Bacteroides_stercoris	P29-1	P54-2	1
Alistipes_shahii	GE3-1-T7	NL1-2-T7	23			Bacteroides_stercoris	P29-1	P53-1	0
Alistipes_shahii	GE4-2-T0	NL1-1-T28	23			Bacteroides_uniformis	P54-1	P54-2	100
Alistipes_shahii	GE4-1-T7	NL1-1-T28	23			Bacteroides_uniformis	P29-1	P29-2	69
Alistipes_shahii	GE7-2-T7	NL1-1-T0	23			Bacteroides_uniformis	P29-2	P7-1	67
Alistipes_shahii	GE7-2-T30	NL1-1-T0	23			Bacteroides_uniformis	P29-2	P5-1	61
Alistipes_shahii	GE7-1-T30	NL1-1-T0	23			Bacteroides_uniformis	P29-2	P82-2	60
Alistipes_shahii	NL1-2-T0	GE3-1-T0	23			Bacteroides_uniformis	P29-2	P53-2	59
Alistipes_shahii	GE7-2-T7	GE4-1-T7	23			Bacteroides_uniformis	P29-1	P47-2	57
Alistipes_shahii	GE7-2-T30	GE4-1-T7	23			Bacteroides_uniformis	P29-1	P5-1	56
Alistipes_shahii	GE7-1-T30	GE4-1-T7	23			Bacteroides_uniformis	P5-1	P53-2	56
Alistipes_shahii	GE7-1-T30	GE4-2-T7	23			Bacteroides_uniformis	P29-2	P54-1	55
Alistipes_shahii	GE4-2-T0	GE7-1-T0	23			Bacteroides_uniformis	P29-1	P53-2	54
Alistipes_shahii	GE3-2-T0	NL1-1-T28	22			Bacteroides_uniformis	P29-1	P54-1	53
Alistipes_shahii	GE4-1-T30	NL1-1-T28	22			Bacteroides_uniformis	P29-2	P47-1	53
Alistipes_shahii	GE7-1-T7	NL1-1-T0	22			Bacteroides_uniformis	P5-1	P53-1	51
Alistipes_shahii	GE7-2-T7	GE4-2-T0	22			Bacteroides_uniformis	P5-1	P54-1	47
Alistipes_shahii	GE7-2-T0	GE4-2-T0	22			Bacteroides_uniformis	P47-1	P5-1	47
Alistipes_shahii	GE7-1-T7	GE4-1-T7	22			Bacteroides_uniformis	P29-1	P47-1	46
Alistipes_shahii	GE4-1-T30	GE7-1-T0	22			Bacteroides_uniformis	P47-1	P53-2	45
Alistipes_shahii	GE7-2-T30	GE4-2-T0	21			Bacteroides_uniformis	P29-2	P54-2	44
Alistipes_shahii	GE7-1-T30	GE4-2-T0	21			Bacteroides_uniformis	P29-2	P47-2	43
Alistipes_shahii	GE7-1-T7	GE4-2-T0	21			Bacteroides_uniformis	P5-1	P54-2	41
Alistipes_shahii	GE7-1-T0	NL1-1-T28	20			Bacteroides_uniformis	P53-2	P54-1	40
Alistipes_shahii	NL1-2-T0	GE3-1-T30	20			Bacteroides_uniformis	P29-1	P54-2	38
Alistipes_shahii	GE7-2-T7	GE4-1-T30	20			Bacteroides_uniformis	P47-1	P54-1	34
Alistipes_shahii	GE7-2-T0	GE4-1-T30	20			Bacteroides_uniformis	P53-2	P54-2	34
Alistipes_shahii	GE7-2-T7	NL1-1-T28	19			Bacteroides_uniformis	P47-2	P7-2	34
Alistipes_shahii	GE7-2-T0	NL1-1-T28	19			Bacteroides_uniformis	P5-1	P82-1	33
Alistipes_shahii	GE7-1-T30	NL1-1-T28	19			Bacteroides_uniformis	P29-2	P5-2	32
Alistipes_shahii	GE3-2-T0	GE4-2-T7	19			Bacteroides_uniformis	P29-1	P82-2	32
Alistipes_shahii	GE7-2-T30	GE4-1-T30	19			Bacteroides_uniformis	P47-1	P54-2	32
Alistipes_shahii	GE7-1-T7	GE4-1-T30	19			Bacteroides_uniformis	P47-2	P54-1	31
Alistipes_shahii	GE7-1-T30	GE4-1-T30	19			Bacteroides_uniformis	P5-1	P5-2	31
Alistipes_shahii	GE3-2-T0	GE4-1-T7	18			Bacteroides_uniformis	P29-1	P5-2	31
Alistipes_shahii	GE7-2-T30	NL1-1-T28	18			Bacteroides_uniformis	P5-2	P53-2	31
Alistipes_shahii	GE7-1-T7	NL1-1-T28	18			Bacteroides_uniformis	P53-2	P82-2	30
Alistipes_shahii	GE4-1-T7	NL1-2-T28	17			Bacteroides_uniformis	P29-2	P82-1	29
Alistipes_shahii	GE4-2-T7	NL1-2-T28	17			Bacteroides_uniformis	P29-1	P7-1	29
Alistipes_shahii	GE3-2-T0	GE4-2-T0	16			Bacteroides_uniformis	P5-1	P82-2	29
Alistipes_shahii	NL1-2-T0	GE3-1-T7	16			Bacteroides_uniformis	P47-1	P82-2	29
Alistipes_shahii	GE4-2-T0	NL1-2-T28	16			Bacteroides_uniformis	P29-1	P82-1	28
Alistipes_shahii	GE4-1-T7	NL1-2-T7	16			Bacteroides_uniformis	P47-1	P5-2	28
Alistipes_shahii	GE4-2-T7	NL1-2-T7	16			Bacteroides_uniformis	P47-2	P5-1	27
Alistipes_shahii	GE3-2-T0	GE4-1-T30	15			Bacteroides_uniformis	P53-2	P82-1	25
Alistipes_shahii	GE4-1-T30	NL1-2-T28	15			Bacteroides_uniformis	P54-1	P7-1	25
Alistipes_shahii	GE4-2-T0	NL1-2-T7	15			Bacteroides_uniformis	P47-2	P53-2	24
Alistipes_shahii	GE7-1-T0	NL1-2-T28	15			Bacteroides_uniformis	P5-1	P7-1	24
Alistipes_shahii	NL1-2-T0	GE4-2-T7	14			Bacteroides_uniformis	P47-1	P47-2	23
Alistipes_shahii	GE4-1-T30	NL1-2-T7	14			Bacteroides_uniformis	P47-2	P54-2	23
Alistipes_shahii	GE7-1-T30	NL1-2-T28	14			Bacteroides_uniformis	P54-2	P7-1	23
Alistipes_shahii	GE7-1-T0	NL1-2-T7	14			Bacteroides_uniformis	P5-1	P97-2	22
Alistipes_shahii	GE3-2-T0	GE7-1-T0	14			Bacteroides_uniformis	P29-2	P53-1	22
Alistipes_shahii	GE7-2-T7	GE3-2-T0	13			Bacteroides_uniformis	P5-2	P82-2	22
Alistipes_shahii	NL1-2-T0	GE4-1-T7	13			Bacteroides_uniformis	P29-2	P97-2	20
Alistipes_shahii	GE3-2-T0	NL1-2-T7	13			Bacteroides_uniformis	P47-1	P82-1	20
Alistipes_shahii	GE3-2-T0	NL1-2-T28	13			Bacteroides_uniformis	P47-2	P7-1	20
Alistipes_shahii	GE7-2-T7	NL1-2-T28	13			Bacteroides_uniformis	P53-2	P7-1	20
Alistipes_shahii	GE7-1-T7	NL1-2-T28	13			Bacteroides_uniformis	P53-1	P54-2	20
Alistipes_shahii	GE7-2-T0	NL1-2-T28	13			Bacteroides_uniformis	P53-2	P97-2	19
Alistipes_shahii	GE3-2-T0	GE7-2-T0	13			Bacteroides_uniformis	P47-1	P7-1	19
Alistipes_shahii	GE3-2-T0	GE7-1-T30	13			Bacteroides_uniformis	P53-1	P53-2	19
Alistipes_shahii	GE7-2-T7	NL1-2-T7	12			Bacteroides_uniformis	P53-1	P7-2	19
Alistipes_shahii	GE7-2-T30	NL1-2-T28	12			Bacteroides_uniformis	P5-2	P7-2	19
Alistipes_shahii	GE7-2-T0	NL1-2-T7	12			Bacteroides_uniformis	P7-2	P82-2	19
Alistipes_shahii	GE7-1-T30	NL1-2-T7	12			Bacteroides_uniformis	P5-2	P54-1	18
Alistipes_shahii	GE7-1-T7	GE3-2-T0	11			Bacteroides_uniformis	P54-1	P82-1	18
Alistipes_shahii	NL1-2-T0	GE4-2-T0	11			Bacteroides_uniformis	P29-1	P53-1	18
Alistipes_shahii	GE7-2-T30	NL1-2-T7	11			Bacteroides_uniformis	P54-1	P82-2	18
Alistipes_shahii	GE7-1-T7	NL1-2-T7	11			Bacteroides_uniformis	P54-2	P97-2	18
Alistipes_shahii	NL1-2-T0	GE7-1-T0	11			Bacteroides_uniformis	P5-2	P54-2	18
Alistipes_shahii	GE7-2-T30	GE3-2-T0	10			Bacteroides_uniformis	P54-2	P82-1	18
Alistipes_shahii	NL1-2-T0	GE4-1-T30	10			Bacteroides_uniformis	P7-2	P97-2	18
Alistipes_shahii	NL1-2-T0	GE7-2-T0	8			Bacteroides_uniformis	P7-2	P82-1	18
Alistipes_shahii	NL1-2-T0	GE7-1-T30	8			Bacteroides_uniformis	P29-1	P97-2	17
Alistipes_shahii	NL1-2-T0	GE3-2-T0	7			Bacteroides_uniformis	P53-1	P54-1	17
Alistipes_shahii	NL1-2-T0	GE7-2-T7	7			Bacteroides_uniformis	P29-2	P97-1	17
Alistipes_shahii	NL1-2-T0	GE7-2-T30	7			Bacteroides_uniformis	P54-2	P82-2	17
Alistipes_shahii	NL1-2-T0	GE7-1-T7	7			Bacteroides_uniformis	P54-1	P97-2	16
Bacteroides_ovatus	GE4-2-T30	GE4-2-T0	100			Bacteroides_uniformis	P47-1	P97-2	16
Bacteroides_ovatus	GE4-1-T30	GE4-1-T7	100			Bacteroides_uniformis	P82-1	P82-2	16
Bacteroides_ovatus	GE7-1-T30	GE7-1-T0	99			Bacteroides_uniformis	P47-1	P53-1	15
Bacteroides_ovatus	GE7-1-T30	GE7-1-T7	99			Bacteroides_uniformis	P29-1	P97-1	15
Bacteroides_ovatus	GE7-1-T0	GE7-1-T7	99			Bacteroides_uniformis	P5-1	P97-1	15
Bacteroides_ovatus	GE4-2-T30	GE4-2-T7	99			Bacteroides_uniformis	P5-2	P82-1	14
Bacteroides_ovatus	GE4-2-T7	GE4-2-T0	99			Bacteroides_uniformis	P47-2	P5-2	13
Bacteroides_ovatus	GE4-2-T30	GE4-1-T30	99			Bacteroides_uniformis	P47-2	P82-2	13
Bacteroides_ovatus	GE4-2-T7	GE4-1-T30	99			Bacteroides_uniformis	P53-2	P97-1	13
Bacteroides_ovatus	GE4-2-T7	GE4-1-T7	99			Bacteroides_uniformis	P47-2	P82-1	12
Bacteroides_ovatus	GE4-2-T0	GE4-1-T30	99			Bacteroides_uniformis	P47-1	P97-1	11
Bacteroides_ovatus	GE4-2-T30	GE4-1-T7	99			Bacteroides_uniformis	P54-1	P97-1	11
Bacteroides_ovatus	GE4-2-T0	GE4-1-T7	99			Bacteroides_uniformis	P54-2	P97-1	11
Bacteroides_ovatus	GE3-1-T7	GE3-1-T0	99			Bacteroides_uniformis	P5-2	P7-1	10
Bacteroides_ovatus	NL1-1-T28	NL1-1-T0	99			Bacteroides_uniformis	P53-1	P97-2	10
Bacteroides_ovatus	GE3-1-T7	GE3-1-T30	98			Bacteroides_uniformis	P7-1	P82-1	9
Bacteroides_ovatus	GE3-1-T0	GE3-1-T30	98			Bacteroides_uniformis	P53-1	P7-1	9
Bacteroides_ovatus	NL1-1-T7	NL1-1-T28	98			Bacteroides_uniformis	P7-1	P82-2	9
Bacteroides_ovatus	GE3-2-T0	GE3-1-T30	98			Bacteroides_uniformis	P53-1	P82-2	9
Bacteroides_ovatus	NL1-1-T7	NL1-1-T0	98			Bacteroides_uniformis	P82-1	P97-1	9
Bacteroides_ovatus	GE7-2-T7	GE7-2-T0	97			Bacteroides_uniformis	P7-2	P97-1	9
Bacteroides_ovatus	NL1-2-T7	NL1-2-T0	97			Bacteroides_uniformis	P47-2	P53-1	8
Bacteroides_ovatus	GE3-1-T0	GE3-2-T0	96			Bacteroides_uniformis	P47-2	P97-2	8
Bacteroides_ovatus	GE3-1-T7	GE3-2-T0	95			Bacteroides_uniformis	P5-2	P97-2	8
Bacteroides_ovatus	GE7-2-T7	GE7-2-T30	93			Bacteroides_uniformis	P82-1	P97-2	8
Bacteroides_ovatus	GE7-1-T0	GE7-2-T7	90			Bacteroides_uniformis	P5-2	P53-1	8
Bacteroides_ovatus	NL1-2-T7	NL1-2-T28	90			Bacteroides_uniformis	P7-1	P97-2	8
Bacteroides_ovatus	GE7-2-T30	GE7-2-T0	89			Bacteroides_uniformis	P82-2	P97-2	8
Bacteroides_ovatus	NL1-2-T28	NL1-2-T0	86			Bacteroides_uniformis	P53-1	P82-1	8
Bacteroides_ovatus	NL1-2-T28	NL1-1-T0	84			Bacteroides_uniformis	P47-2	P97-1	7
Bacteroides_ovatus	GE7-1-T7	GE7-2-T7	83			Bacteroides_uniformis	P5-2	P97-1	7
Bacteroides_ovatus	GE7-1-T0	GE7-2-T0	82			Bacteroides_uniformis	P82-2	P97-1	6
Bacteroides_ovatus	NL1-2-T28	NL1-1-T28	80			Bacteroides_uniformis	P7-1	P97-1	5
Bacteroides_ovatus	NL1-1-T7	NL1-2-T28	77			Bacteroides_uniformis	P97-1	P97-2	5
Bacteroides_ovatus	GE7-1-T30	GE7-2-T7	76			Bacteroides_uniformis	P53-1	P97-1	5
Bacteroides_ovatus	GE7-1-T7	GE7-2-T0	69			Bacteroides_vulgatus	P7-1	P7-2	99
Bacteroides_ovatus	GE7-1-T30	GE7-2-T0	64			Bacteroides_vulgatus	P47-1	P47-2	98
Bacteroides_ovatus	GE4-2-T30	GE7-2-T30	61			Bacteroides_vulgatus	P29-1	P29-2	96
Bacteroides_ovatus	NL1-2-T7	NL1-1-T0	59			Bacteroides_vulgatus	P53-1	P53-2	94
Bacteroides_ovatus	GE4-2-T30	GE7-2-T7	57			Bacteroides_vulgatus	P53-2	P82-1	93
Bacteroides_ovatus	GE7-2-T7	NL1-2-T0	56			Bacteroides_vulgatus	P5-2	P82-2	86
Bacteroides_ovatus	GE7-2-T7	NL1-2-T28	54			Bacteroides_vulgatus	P5-2	P54-1	85
Bacteroides_ovatus	GE7-2-T7	NL1-2-T7	53			Bacteroides_vulgatus	P29-2	P47-2	80
Bacteroides_ovatus	GE7-1-T0	GE7-2-T30	53			Bacteroides_vulgatus	P5-2	P53-2	79
Bacteroides_ovatus	NL1-2-T7	NL1-1-T7	52			Bacteroides_vulgatus	P29-1	P47-2	78
Bacteroides_ovatus	NL1-2-T28	GE7-2-T0	51			Bacteroides_vulgatus	P47-2	P5-2	78
Bacteroides_ovatus	NL1-2-T0	NL1-1-T0	50			Bacteroides_vulgatus	P29-1	P5-2	77
Bacteroides_ovatus	NL1-2-T7	NL1-1-T28	49			Bacteroides_vulgatus	P29-2	P82-2	76
Bacteroides_ovatus	GE4-2-T0	GE7-2-T7	49			Bacteroides_vulgatus	P29-1	P5-1	74
Bacteroides_ovatus	GE4-2-T30	GE7-2-T0	49			Bacteroides_vulgatus	P29-1	P82-2	74
Bacteroides_ovatus	GE3-2-T0	NL1-1-T0	48			Bacteroides_vulgatus	P29-2	P5-2	74
Bacteroides_ovatus	GE3-1-T30	NL1-1-T0	48			Bacteroides_vulgatus	P54-1	P82-2	73
Bacteroides_ovatus	GE3-2-T7	NL1-1-T0	47			Bacteroides_vulgatus	P47-2	P82-2	71
Bacteroides_ovatus	NL1-2-T7	GE7-2-T0	47			Bacteroides_vulgatus	P29-2	P5-1	70
Bacteroides_ovatus	NL1-2-T0	GE7-2-T0	47			Bacteroides_vulgatus	P53-2	P54-1	69
Bacteroides_ovatus	GE3-1-T0	NL1-1-T0	46			Bacteroides_vulgatus	P29-1	P53-2	67
Bacteroides_ovatus	GE4-2-T0	GE7-2-T30	46			Bacteroides_vulgatus	P47-2	P53-2	67
Bacteroides_ovatus	GE3-2-T0	NL1-1-T28	45			Bacteroides_vulgatus	P54-1	P7-2	66
Bacteroides_ovatus	GE3-1-T30	NL1-1-T28	45			Bacteroides_vulgatus	P53-2	P82-2	65
Bacteroides_ovatus	GE3-1-T7	NL1-1-T0	45			Bacteroides_vulgatus	P53-2	P7-2	65
Bacteroides_ovatus	GE4-2-T0	GE7-2-T0	45			Bacteroides_vulgatus	P29-2	P53-2	64
Bacteroides_ovatus	GE3-2-T7	NL1-1-T28	44			Bacteroides_vulgatus	P47-2	P54-1	64
Bacteroides_ovatus	GE7-1-T0	NL1-2-T28	44			Bacteroides_vulgatus	P5-2	P7-2	62
Bacteroides_ovatus	GE7-1-T0	NL1-2-T0	44			Bacteroides_vulgatus	P29-2	P54-1	60
Bacteroides_ovatus	NL1-1-T7	GE3-1-T30	44			Bacteroides_vulgatus	P29-1	P54-1	59
Bacteroides_ovatus	GE3-2-T7	GE3-2-T0	44			Bacteroides_vulgatus	P47-2	P5-1	58
Bacteroides_ovatus	GE3-2-T7	GE3-1-T30	44			Bacteroides_vulgatus	P29-2	P47-1	57
Bacteroides_ovatus	GE4-2-T30	GE7-1-T7	44			Bacteroides_vulgatus	P5-2	P53-1	56
Bacteroides_ovatus	GE7-2-T30	NL1-2-T0	43			Bacteroides_vulgatus	P5-1	P5-2	54
Bacteroides_ovatus	NL1-1-T7	GE3-2-T0	43			Bacteroides_vulgatus	P53-1	P7-2	54
Bacteroides_ovatus	NL1-1-T7	NL1-2-T0	43			Bacteroides_vulgatus	P29-1	P47-1	52
Bacteroides_ovatus	GE4-2-T30	GE7-1-T0	43			Bacteroides_vulgatus	P5-1	P82-2	51
Bacteroides_ovatus	GE3-1-T7	NL1-1-T28	42			Bacteroides_vulgatus	P53-2	P7-1	50
Bacteroides_ovatus	GE3-1-T0	NL1-1-T28	42			Bacteroides_vulgatus	P53-1	P54-1	47
Bacteroides_ovatus	GE7-1-T7	NL1-2-T28	42			Bacteroides_vulgatus	P5-2	P7-1	47
Bacteroides_ovatus	GE7-1-T7	NL1-2-T0	42			Bacteroides_vulgatus	P54-1	P7-1	47
Bacteroides_ovatus	NL1-1-T7	GE3-2-T7	42			Bacteroides_vulgatus	P47-1	P5-2	43
Bacteroides_ovatus	GE4-2-T0	GE7-1-T7	42			Bacteroides_vulgatus	P29-1	P97-1	43
Bacteroides_ovatus	GE3-1-T0	NL1-1-T7	41			Bacteroides_vulgatus	P47-2	P53-1	43
Bacteroides_ovatus	NL1-2-T28	GE3-2-T0	41			Bacteroides_vulgatus	P47-1	P82-2	42
Bacteroides_ovatus	GE3-1-T0	GE3-2-T7	41			Bacteroides_vulgatus	P7-2	P82-2	42
Bacteroides_ovatus	GE4-2-T0	GE7-1-T0	41			Bacteroides_vulgatus	P47-1	P5-1	41
Bacteroides_ovatus	GE3-1-T7	NL1-1-T7	40			Bacteroides_vulgatus	P53-1	P7-1	41
Bacteroides_ovatus	NL1-2-T28	GE3-2-T7	40			Bacteroides_vulgatus	P5-1	P53-2	40
Bacteroides_ovatus	NL1-2-T28	GE3-1-T30	40			Bacteroides_vulgatus	P29-2	P7-2	40
Bacteroides_ovatus	GE3-1-T7	GE3-2-T7	40			Bacteroides_vulgatus	P47-2	P7-2	40
Bacteroides_ovatus	NL1-2-T0	NL1-1-T28	40			Bacteroides_vulgatus	P5-2	P97-1	39
Bacteroides_ovatus	GE7-1-T0	NL1-2-T7	39			Bacteroides_vulgatus	P53-2	P97-1	39
Bacteroides_ovatus	GE7-2-T7	NL1-1-T0	39			Bacteroides_vulgatus	P29-1	P7-2	39
Bacteroides_ovatus	GE7-1-T7	GE7-2-T30	39			Bacteroides_vulgatus	P47-2	P7-1	38
Bacteroides_ovatus	GE7-1-T30	GE4-2-T30	39			Bacteroides_vulgatus	P29-2	P53-1	37
Bacteroides_ovatus	GE7-2-T7	GE3-2-T0	38			Bacteroides_vulgatus	P5-1	P54-1	36
Bacteroides_ovatus	GE7-1-T30	GE4-2-T0	38			Bacteroides_vulgatus	P53-1	P82-2	36
Bacteroides_ovatus	NL1-2-T7	GE7-2-T30	38			Bacteroides_vulgatus	P82-2	P97-1	35
Bacteroides_ovatus	GE7-1-T7	NL1-2-T7	37			Bacteroides_vulgatus	P82-2	P97-2	35
Bacteroides_ovatus	GE7-2-T30	NL1-2-T28	36			Bacteroides_vulgatus	P29-2	P97-1	34
Bacteroides_ovatus	GE7-1-T7	GE4-1-T30	36			Bacteroides_vulgatus	P29-1	P53-1	34
Bacteroides_ovatus	GE7-1-T7	GE4-1-T7	36			Bacteroides_vulgatus	P5-2	P82-1	34
Bacteroides_ovatus	GE4-2-T7	GE7-1-T7	36			Bacteroides_vulgatus	P29-1	P82-1	33
Bacteroides_ovatus	GE7-2-T7	GE3-1-T30	35			Bacteroides_vulgatus	P47-1	P53-2	32
Bacteroides_ovatus	GE7-1-T0	GE4-1-T30	35			Bacteroides_vulgatus	P47-2	P97-1	32
Bacteroides_ovatus	GE7-1-T0	GE4-1-T7	35			Bacteroides_vulgatus	P29-2	P7-1	31
Bacteroides_ovatus	GE4-2-T7	GE7-1-T0	35			Bacteroides_vulgatus	P7-1	P82-2	30
Bacteroides_ovatus	GE7-2-T7	NL1-1-T28	34			Bacteroides_vulgatus	P47-1	P54-1	29
Bacteroides_ovatus	GE7-1-T0	NL1-1-T0	34			Bacteroides_vulgatus	P29-1	P7-1	29
Bacteroides_ovatus	GE7-2-T7	NL1-1-T7	33			Bacteroides_vulgatus	P29-2	P82-1	28
Bacteroides_ovatus	GE7-1-T30	GE7-2-T30	33			Bacteroides_vulgatus	P47-2	P82-1	28
Bacteroides_ovatus	GE7-2-T7	GE3-2-T7	33			Bacteroides_vulgatus	P54-1	P97-1	27
Bacteroides_ovatus	GE7-1-T0	GE3-2-T0	33			Bacteroides_vulgatus	P82-1	P82-2	27
Bacteroides_ovatus	GE7-1-T30	GE4-1-T7	33			Bacteroides_vulgatus	P54-1	P82-1	27
Bacteroides_ovatus	GE7-1-T7	NL1-1-T0	32			Bacteroides_vulgatus	P7-2	P82-1	25
Bacteroides_ovatus	NL1-2-T7	GE3-2-T0	32			Bacteroides_vulgatus	P7-2	P97-1	25
Bacteroides_ovatus	GE7-1-T30	GE4-2-T7	32			Bacteroides_vulgatus	P5-1	P7-2	25
Bacteroides_ovatus	GE7-1-T30	GE4-1-T30	32			Bacteroides_vulgatus	P5-2	P97-2	22
Bacteroides_ovatus	GE4-2-T7	GE7-2-T7	32			Bacteroides_vulgatus	P5-1	P97-1	20
Bacteroides_ovatus	GE3-1-T0	NL1-2-T28	31			Bacteroides_vulgatus	P5-1	P53-1	19
Bacteroides_ovatus	GE7-1-T30	NL1-2-T28	31			Bacteroides_vulgatus	P82-1	P97-1	19
Bacteroides_ovatus	GE7-1-T7	GE3-2-T0	31			Bacteroides_vulgatus	P5-1	P82-1	18
Bacteroides_ovatus	GE7-1-T0	GE3-1-T30	31			Bacteroides_vulgatus	P47-1	P7-2	17
Bacteroides_ovatus	GE3-2-T0	GE7-2-T0	31			Bacteroides_vulgatus	P47-1	P53-1	16
Bacteroides_ovatus	GE7-1-T0	NL1-1-T28	30			Bacteroides_vulgatus	P5-1	P7-1	16
Bacteroides_ovatus	NL1-2-T7	GE3-1-T30	30			Bacteroides_vulgatus	P53-1	P82-1	14
Bacteroides_ovatus	GE7-1-T7	GE3-1-T30	30			Bacteroides_vulgatus	P47-1	P97-1	13
Bacteroides_ovatus	GE3-1-T7	NL1-2-T28	29			Bacteroides_vulgatus	P47-1	P7-1	13
Bacteroides_ovatus	GE7-1-T30	NL1-2-T0	29			Bacteroides_vulgatus	P47-1	P82-1	12
Bacteroides_ovatus	GE7-2-T0	NL1-1-T0	29			Bacteroides_vulgatus	P7-1	P82-1	12
Bacteroides_ovatus	NL1-2-T7	GE3-2-T7	29			Bacteroides_vulgatus	P53-1	P97-1	11
Bacteroides_ovatus	GE7-1-T0	GE3-2-T7	29			Bacteroides_vulgatus	P7-1	P97-1	10
Bacteroides_ovatus	GE7-1-T0	NL1-1-T7	28			Bacteroides_vulgatus	P54-1	P97-2	6
Bacteroides_ovatus	GE7-1-T7	NL1-1-T28	28			Bacteroides_vulgatus	P29-1	P97-2	1
Bacteroides_ovatus	GE4-2-T30	NL1-2-T7	28			Bacteroides_vulgatus	P29-2	P97-2	1
Bacteroides_ovatus	GE4-2-T30	NL1-2-T0	27			Bacteroides_vulgatus	P47-1	P97-2	1
Bacteroides_ovatus	GE7-1-T7	NL1-1-T7	27			Bacteroides_vulgatus	P47-2	P97-2	1
Bacteroides_ovatus	GE7-2-T7	GE3-1-T0	27			Bacteroides_vulgatus	P5-1	P97-2	1
Bacteroides_ovatus	GE7-1-T7	GE3-2-T7	27			Bacteroides_vulgatus	P53-2	P97-2	1
Bacteroides_ovatus	NL1-2-T0	GE3-2-T0	27			Bacteroides_vulgatus	P97-1	P97-2	1
Bacteroides_ovatus	GE7-2-T7	GE4-1-T30	27			Bacteroides_vulgatus	P7-2	P97-2	1
Bacteroides_ovatus	GE7-2-T7	GE4-1-T7	27			Bacteroides_vulgatus	P54-2	P97-2	1
Bacteroides_ovatus	GE3-2-T7	GE7-2-T0	27			Bacteroides_vulgatus	P7-1	P97-2	0
Bacteroides_ovatus	GE4-2-T30	NL1-2-T28	26			Bacteroides_vulgatus	P82-1	P97-2	0
Bacteroides_ovatus	GE7-1-T30	NL1-2-T7	26			Bacteroides_vulgatus	P53-1	P97-2	0
Bacteroides_ovatus	GE7-2-T0	NL1-1-T28	26			Barnesiella_intestinihominis	P53-1	P53-2	99
Bacteroides_ovatus	GE7-2-T7	GE3-1-T7	26			Barnesiella_intestinihominis	P5-1	P97-2	79
Bacteroides_ovatus	GE7-2-T0	GE3-1-T30	26			Barnesiella_intestinihominis	P5-2	P82-1	65
Bacteroides_ovatus	GE4-2-T7	GE7-2-T0	26			Barnesiella_intestinihominis	P82-1	P97-1	45
Bacteroides_ovatus	NL1-2-T0	GE3-2-T7	25			Barnesiella_intestinihominis	P5-2	P97-1	39
Bacteroides_ovatus	NL1-2-T0	GE3-1-T30	25			Barnesiella_intestinihominis	P47-2	P82-2	22
Bacteroides_ovatus	GE4-2-T0	NL1-2-T7	24			Barnesiella_intestinihominis	P29-1	P82-1	20
Bacteroides_ovatus	GE4-2-T0	NL1-2-T28	24			Barnesiella_intestinihominis	P47-2	P53-1	20
Bacteroides_ovatus	GE4-2-T0	NL1-2-T0	23			Barnesiella_intestinihominis	P47-2	P53-2	20
Bacteroides_ovatus	GE7-2-T30	NL1-1-T0	23			Barnesiella_intestinihominis	P47-2	P5-1	19
Bacteroides_ovatus	GE7-1-T0	GE3-1-T0	23			Barnesiella_intestinihominis	P47-2	P97-2	19
Bacteroides_ovatus	GE4-1-T30	GE7-2-T0	23			Barnesiella_intestinihominis	P29-1	P97-1	18
Bacteroides_ovatus	GE7-1-T0	GE3-1-T7	22			Barnesiella_intestinihominis	P29-2	P47-2	18
Bacteroides_ovatus	GE7-1-T7	GE3-1-T7	22			Barnesiella_intestinihominis	P47-2	P7-1	17
Bacteroides_ovatus	GE7-1-T7	GE3-1-T0	22			Barnesiella_intestinihominis	P29-1	P5-2	16
Bacteroides_ovatus	NL1-2-T7	GE3-1-T0	22			Barnesiella_intestinihominis	P29-1	P53-1	13
Bacteroides_ovatus	GE4-2-T7	GE7-2-T30	22			Barnesiella_intestinihominis	P29-1	P53-2	13
Bacteroides_ovatus	GE4-1-T7	GE7-2-T0	22			Barnesiella_intestinihominis	P29-1	P29-2	13
Bacteroides_ovatus	NL1-1-T7	GE7-2-T0	22			Barnesiella_intestinihominis	P47-2	P82-1	13
Bacteroides_ovatus	GE7-1-T30	NL1-1-T0	21			Barnesiella_intestinihominis	P29-1	P7-1	11
Bacteroides_ovatus	GE7-2-T30	GE3-2-T0	21			Barnesiella_intestinihominis	P53-2	P82-1	10
Bacteroides_ovatus	GE3-1-T0	GE7-2-T0	21			Barnesiella_intestinihominis	P29-1	P5-1	10
Bacteroides_ovatus	GE3-1-T7	NL1-2-T7	20			Barnesiella_intestinihominis	P29-1	P82-2	10
Bacteroides_ovatus	GE7-1-T30	GE3-2-T0	20			Barnesiella_intestinihominis	P29-1	P97-2	10
Bacteroides_ovatus	GE7-2-T30	GE3-2-T7	20			Barnesiella_intestinihominis	P47-2	P5-2	10
Bacteroides_ovatus	GE7-2-T30	NL1-1-T28	19			Barnesiella_intestinihominis	P47-2	P97-1	10
Bacteroides_ovatus	GE7-2-T30	GE3-1-T30	19			Barnesiella_intestinihominis	P53-1	P82-1	9
Bacteroides_ovatus	GE3-1-T7	GE7-2-T0	19			Barnesiella_intestinihominis	P53-1	P97-1	9
Bacteroides_ovatus	GE3-1-T0	NL1-2-T0	18			Barnesiella_intestinihominis	P53-2	P97-1	9
Bacteroides_ovatus	GE7-1-T30	NL1-1-T28	18			Barnesiella_intestinihominis	P7-1	P82-1	9
Bacteroides_ovatus	GE7-1-T30	GE3-1-T30	18			Barnesiella_intestinihominis	P7-1	P97-1	8
Bacteroides_ovatus	GE7-1-T30	GE3-2-T7	17			Barnesiella_intestinihominis	P97-1	P97-2	8
Bacteroides_ovatus	GE3-1-T7	NL1-2-T0	17			Barnesiella_intestinihominis	P5-2	P7-1	8
Bacteroides_ovatus	GE7-2-T30	NL1-1-T7	17			Barnesiella_intestinihominis	P5-2	P53-1	7
Bacteroides_ovatus	GE4-2-T7	NL1-2-T7	16			Barnesiella_intestinihominis	P5-1	P97-1	7
Bacteroides_ovatus	GE4-2-T7	NL1-2-T28	16			Barnesiella_intestinihominis	P5-2	P53-2	7
Bacteroides_ovatus	GE4-1-T30	NL1-2-T28	16			Barnesiella_intestinihominis	P82-1	P97-2	6
Bacteroides_ovatus	GE7-1-T30	NL1-1-T7	16			Barnesiella_intestinihominis	P5-1	P82-1	6
Bacteroides_ovatus	GE4-1-T7	GE7-2-T30	16			Barnesiella_intestinihominis	P82-2	P97-2	6
Bacteroides_ovatus	GE7-1-T30	GE3-1-T7	15			Barnesiella_intestinihominis	P5-1	P82-2	6
Bacteroides_ovatus	GE7-1-T30	GE3-1-T0	15			Barnesiella_intestinihominis	P29-2	P5-2	6
Bacteroides_ovatus	GE4-1-T7	NL1-2-T28	15			Barnesiella_intestinihominis	P29-2	P82-1	6
Bacteroides_ovatus	GE4-2-T7	NL1-2-T0	15			Barnesiella_intestinihominis	P82-1	P82-2	5
Bacteroides_ovatus	GE3-1-T0	GE7-2-T30	15			Barnesiella_intestinihominis	P82-2	P97-1	5
Bacteroides_ovatus	GE4-1-T30	GE7-2-T30	15			Barnesiella_intestinihominis	P5-1	P53-2	5
Bacteroides_ovatus	NL1-2-T7	GE4-1-T30	14			Barnesiella_intestinihominis	P53-1	P82-2	5
Bacteroides_ovatus	NL1-2-T7	GE4-1-T7	14			Barnesiella_intestinihominis	P53-2	P82-2	5
Bacteroides_ovatus	GE3-1-T7	GE7-2-T30	14			Barnesiella_intestinihominis	P53-2	P97-2	5
Bacteroides_ovatus	GE4-1-T30	NL1-2-T0	13			Barnesiella_intestinihominis	P29-2	P7-1	5
Bacteroides_ovatus	GE4-1-T7	NL1-2-T0	13			Barnesiella_intestinihominis	P29-2	P53-2	5
Bacteroides_ovatus	GE4-2-T30	NL1-1-T0	13			Barnesiella_intestinihominis	P5-1	P53-1	4
Bacteroides_ovatus	GE4-2-T0	NL1-1-T0	12			Barnesiella_intestinihominis	P53-1	P7-1	4
Bacteroides_ovatus	GE4-2-T30	NL1-1-T7	11			Barnesiella_intestinihominis	P53-1	P97-2	4
Bacteroides_ovatus	GE4-2-T0	NL1-1-T7	11			Barnesiella_intestinihominis	P53-2	P7-1	4
Bacteroides_ovatus	GE4-2-T30	NL1-1-T28	11			Barnesiella_intestinihominis	P7-1	P97-2	4
Bacteroides_ovatus	GE4-2-T0	NL1-1-T28	11			Barnesiella_intestinihominis	P5-1	P5-2	4
Bacteroides_ovatus	GE4-2-T7	NL1-1-T0	11			Barnesiella_intestinihominis	P5-2	P97-2	4
Bacteroides_ovatus	GE4-1-T30	NL1-1-T0	11			Barnesiella_intestinihominis	P29-2	P97-1	4
Bacteroides_ovatus	GE4-1-T7	NL1-1-T0	11			Barnesiella_intestinihominis	P29-2	P5-1	4
Bacteroides_ovatus	GE4-2-T7	NL1-1-T7	10			Barnesiella_intestinihominis	P29-2	P53-1	4
Bacteroides_ovatus	GE4-1-T7	NL1-1-T7	10			Barnesiella_intestinihominis	P5-2	P82-2	3
Bacteroides_ovatus	GE4-2-T7	NL1-1-T28	10			Barnesiella_intestinihominis	P7-1	P82-2	3
Bacteroides_ovatus	GE4-1-T30	NL1-1-T28	10			Barnesiella_intestinihominis	P5-1	P7-1	3
Bacteroides_ovatus	GE4-1-T7	NL1-1-T28	10			Barnesiella_intestinihominis	P29-2	P82-2	3
Bacteroides_ovatus	GE4-2-T30	GE3-2-T7	9			Barnesiella_intestinihominis	P29-2	P97-2	3
Bacteroides_ovatus	GE4-2-T30	GE3-2-T0	9			Bifidobacterium_adolescentis	P47-1	P47-2	74
Bacteroides_ovatus	GE4-2-T0	GE3-2-T7	9			Bifidobacterium_adolescentis	P47-1	P5-1	65
Bacteroides_ovatus	GE4-2-T0	GE3-2-T0	9			Bifidobacterium_adolescentis	P47-1	P5-2	65
Bacteroides_ovatus	GE4-2-T30	GE3-1-T30	9			Bifidobacterium_adolescentis	P5-1	P5-2	61
Bacteroides_ovatus	GE4-2-T0	GE3-1-T30	9			Bifidobacterium_adolescentis	P47-1	P54-2	43
Bacteroides_ovatus	GE4-1-T30	NL1-1-T7	9			Bifidobacterium_adolescentis	P5-1	P54-2	39
Bacteroides_ovatus	GE4-2-T7	GE3-2-T7	8			Bifidobacterium_adolescentis	P47-2	P5-2	37
Bacteroides_ovatus	GE4-1-T30	GE3-2-T7	8			Bifidobacterium_adolescentis	P47-1	P7-1	37
Bacteroides_ovatus	GE4-1-T7	GE3-2-T7	8			Bifidobacterium_adolescentis	P5-2	P54-2	37
Bacteroides_ovatus	GE4-2-T7	GE3-2-T0	8			Bifidobacterium_adolescentis	P5-1	P53-1	35
Bacteroides_ovatus	GE4-1-T30	GE3-2-T0	8			Bifidobacterium_adolescentis	P47-2	P5-1	35
Bacteroides_ovatus	GE4-2-T7	GE3-1-T30	8			Bifidobacterium_adolescentis	P5-2	P53-2	35
Bacteroides_ovatus	GE4-1-T30	GE3-1-T30	8			Bifidobacterium_adolescentis	P5-2	P7-1	35
Bacteroides_ovatus	GE4-2-T30	GE3-1-T7	7			Bifidobacterium_adolescentis	P47-1	P53-1	33
Bacteroides_ovatus	GE4-2-T30	GE3-1-T0	7			Bifidobacterium_adolescentis	P5-1	P97-2	33
Bacteroides_ovatus	GE4-2-T0	GE3-1-T7	7			Bifidobacterium_adolescentis	P29-2	P5-1	32
Bacteroides_ovatus	GE3-1-T0	GE4-1-T7	7			Bifidobacterium_adolescentis	P5-1	P53-2	32
Bacteroides_ovatus	GE4-2-T0	GE3-1-T0	7			Bifidobacterium_adolescentis	P47-1	P97-2	32
Bacteroides_ovatus	GE4-1-T7	GE3-2-T0	7			Bifidobacterium_adolescentis	P5-2	P53-1	31
Bacteroides_ovatus	GE4-1-T7	GE3-1-T30	7			Bifidobacterium_adolescentis	P47-1	P82-1	31
Bacteroides_ovatus	GE3-1-T7	GE4-1-T30	6			Bifidobacterium_adolescentis	P5-2	P82-2	31
Bacteroides_ovatus	GE4-2-T7	GE3-1-T7	6			Bifidobacterium_adolescentis	P47-1	P82-2	31
Bacteroides_ovatus	GE3-1-T7	GE4-1-T7	6			Bifidobacterium_adolescentis	P47-1	P53-2	30
Bacteroides_ovatus	GE4-2-T7	GE3-1-T0	6			Bifidobacterium_adolescentis	P5-2	P82-1	30
Bacteroides_ovatus	GE3-1-T0	GE4-1-T30	6			Bifidobacterium_adolescentis	P5-1	P82-2	30
Bacteroides_sp_1_1_6	NL1-2-T0	NL1-2-T7	100			Bifidobacterium_adolescentis	P5-1	P7-1	29
Bacteroides_sp_1_1_6	GE4-2-T0	GE4-2-T30	100			Bifidobacterium_adolescentis	P5-2	P97-2	29
Bacteroides_sp_1_1_6	GE7-1-T30	GE7-2-T0	99			Bifidobacterium_adolescentis	P29-2	P5-2	28
Bacteroides_sp_1_1_6	NL1-2-T0	NL1-1-T7	99			Bifidobacterium_adolescentis	P5-1	P82-1	28
Bacteroides_sp_1_1_6	NL1-2-T7	NL1-1-T7	99			Bifidobacterium_adolescentis	P47-2	P54-2	28
Bacteroides_sp_1_1_6	NL1-2-T7	NL1-2-T28	99			Bifidobacterium_adolescentis	P29-2	P47-1	26
Bacteroides_sp_1_1_6	NL1-2-T0	NL1-2-T28	99			Bifidobacterium_adolescentis	P54-2	P97-2	26
Bacteroides_sp_1_1_6	GE4-2-T0	GE4-2-T7	99			Bifidobacterium_adolescentis	P53-2	P54-2	24
Bacteroides_sp_1_1_6	GE3-1-T7	GE3-1-T0	99			Bifidobacterium_adolescentis	P29-2	P54-2	22
Bacteroides_sp_1_1_6	GE4-2-T30	GE4-2-T7	99			Bifidobacterium_adolescentis	P53-1	P54-2	21
Bacteroides_sp_1_1_6	GE3-1-T7	GE3-1-T30	99			Bifidobacterium_adolescentis	P54-2	P7-1	21
Bacteroides_sp_1_1_6	GE3-1-T0	GE3-1-T30	99			Bifidobacterium_adolescentis	P29-2	P97-2	20
Bacteroides_sp_1_1_6	GE7-2-T0	GE7-2-T30	98			Bifidobacterium_adolescentis	P47-2	P7-1	19
Bacteroides_sp_1_1_6	NL1-1-T7	NL1-2-T28	98			Bifidobacterium_adolescentis	P53-1	P97-2	19
Bacteroides_sp_1_1_6	GE3-2-T0	GE3-1-T30	98			Bifidobacterium_adolescentis	P53-1	P82-2	19
Bacteroides_sp_1_1_6	GE7-1-T30	GE7-2-T30	97			Bifidobacterium_adolescentis	P47-2	P82-2	19
Bacteroides_sp_1_1_6	GE4-2-T0	GE4-1-T30	97			Bifidobacterium_adolescentis	P54-2	P82-1	19
Bacteroides_sp_1_1_6	GE4-2-T30	GE4-1-T30	97			Bifidobacterium_adolescentis	P82-2	P97-2	19
Bacteroides_sp_1_1_6	GE3-2-T7	GE3-2-T30	97			Bifidobacterium_adolescentis	P53-2	P97-2	18
Bacteroides_sp_1_1_6	GE4-1-T30	GE4-2-T7	97			Bifidobacterium_adolescentis	P47-2	P97-2	18
Bacteroides_sp_1_1_6	GE7-1-T0	GE7-1-T7	96			Bifidobacterium_adolescentis	P53-2	P82-2	18
Bacteroides_sp_1_1_6	GE3-1-T7	GE3-2-T0	96			Bifidobacterium_adolescentis	P53-1	P53-2	17
Bacteroides_sp_1_1_6	GE3-2-T0	GE3-1-T0	96			Bifidobacterium_adolescentis	P53-1	P82-1	17
Bacteroides_sp_1_1_6	GE7-2-T7	GE7-1-T7	94			Bifidobacterium_adolescentis	P53-2	P7-1	17
Bacteroides_sp_1_1_6	GE7-2-T7	GE7-1-T0	91			Bifidobacterium_adolescentis	P47-2	P82-1	16
Bacteroides_sp_1_1_6	GE7-1-T30	GE7-1-T7	83			Bifidobacterium_adolescentis	P7-1	P97-2	16
Bacteroides_sp_1_1_6	GE7-1-T30	GE7-2-T7	77			Bifidobacterium_adolescentis	P82-1	P97-2	16
Bacteroides_sp_1_1_6	GE7-2-T0	GE7-1-T7	77			Bifidobacterium_adolescentis	P29-2	P82-2	16
Bacteroides_sp_1_1_6	GE7-2-T0	GE7-2-T7	74			Bifidobacterium_adolescentis	P47-2	P53-1	15
Bacteroides_sp_1_1_6	GE7-2-T30	GE7-1-T7	70			Bifidobacterium_adolescentis	P47-2	P53-2	15
Bacteroides_sp_1_1_6	GE7-2-T7	GE7-2-T30	69			Bifidobacterium_adolescentis	P53-2	P82-1	15
Bacteroides_sp_1_1_6	GE3-2-T30	GE3-1-T30	67			Bifidobacterium_adolescentis	P7-1	P82-2	15
Bacteroides_sp_1_1_6	GE7-1-T7	GE3-1-T30	67			Bifidobacterium_adolescentis	P82-1	P82-2	15
Bacteroides_sp_1_1_6	GE3-1-T0	GE3-2-T30	65			Bifidobacterium_adolescentis	P29-2	P53-1	14
Bacteroides_sp_1_1_6	GE3-1-T0	GE7-1-T7	65			Bifidobacterium_adolescentis	P29-2	P53-2	14
Bacteroides_sp_1_1_6	GE7-1-T0	GE3-1-T30	64			Bifidobacterium_adolescentis	P53-1	P7-1	14
Bacteroides_sp_1_1_6	GE7-1-T7	GE3-2-T30	64			Bifidobacterium_adolescentis	P7-1	P82-1	14
Bacteroides_sp_1_1_6	GE3-1-T7	GE3-2-T30	63			Bifidobacterium_adolescentis	P29-2	P82-1	13
Bacteroides_sp_1_1_6	GE7-2-T7	GE3-1-T30	63			Bifidobacterium_adolescentis	P29-2	P7-1	12
Bacteroides_sp_1_1_6	GE3-1-T7	GE7-1-T7	63			Bifidobacterium_adolescentis	P29-2	P47-2	11
Bacteroides_sp_1_1_6	GE3-2-T0	GE7-1-T7	63			Clostridium_sp_L2_50	P54-1	P54-2	97
Bacteroides_sp_1_1_6	GE3-2-T7	GE3-1-T30	62			Clostridium_sp_L2_50	P5-2	P53-1	55
Bacteroides_sp_1_1_6	GE7-1-T0	GE3-1-T0	62			Clostridium_sp_L2_50	P53-1	P54-1	49
Bacteroides_sp_1_1_6	GE7-2-T7	GE3-1-T0	60			Clostridium_sp_L2_50	P53-1	P54-2	47
Bacteroides_sp_1_1_6	GE7-1-T30	GE7-1-T0	60			Clostridium_sp_L2_50	P5-2	P82-2	39
Bacteroides_sp_1_1_6	GE3-2-T0	GE3-2-T30	60			Clostridium_sp_L2_50	P54-1	P82-2	34
Bacteroides_sp_1_1_6	GE7-1-T0	GE3-1-T7	59			Clostridium_sp_L2_50	P54-2	P82-2	33
Bacteroides_sp_1_1_6	GE7-1-T0	GE3-2-T30	59			Clostridium_sp_L2_50	P5-2	P54-1	17
Bacteroides_sp_1_1_6	GE3-2-T7	GE3-1-T0	58			Clostridium_sp_L2_50	P5-2	P54-2	17
Bacteroides_sp_1_1_6	GE7-2-T7	GE3-2-T30	58			Collinsella_aerofaciens	P82-1	P82-2	95
Bacteroides_sp_1_1_6	GE7-2-T7	GE3-1-T7	57			Collinsella_aerofaciens	P47-1	P47-2	78
Bacteroides_sp_1_1_6	GE3-2-T7	GE7-1-T7	56			Collinsella_aerofaciens	P54-1	P54-2	44
Bacteroides_sp_1_1_6	GE3-2-T7	GE3-1-T7	55			Collinsella_aerofaciens	P7-1	P7-2	27
Bacteroides_sp_1_1_6	GE7-1-T0	GE3-2-T0	55			Collinsella_aerofaciens	P29-2	P7-2	27
Bacteroides_sp_1_1_6	GE7-2-T7	GE3-2-T0	54			Collinsella_aerofaciens	P29-2	P47-2	23
Bacteroides_sp_1_1_6	GE7-1-T30	GE3-1-T30	54			Collinsella_aerofaciens	P29-1	P7-2	23
Bacteroides_sp_1_1_6	GE7-2-T0	GE7-1-T0	53			Collinsella_aerofaciens	P29-1	P47-2	23
Bacteroides_sp_1_1_6	GE3-2-T7	GE3-2-T0	51			Collinsella_aerofaciens	P29-2	P54-2	22
Bacteroides_sp_1_1_6	GE7-1-T0	GE7-2-T30	50			Collinsella_aerofaciens	P29-2	P47-1	19
Bacteroides_sp_1_1_6	GE7-1-T30	GE3-2-T30	49			Collinsella_aerofaciens	P29-2	P82-2	19
Bacteroides_sp_1_1_6	GE7-2-T0	GE3-1-T30	49			Collinsella_aerofaciens	P29-1	P47-1	19
Bacteroides_sp_1_1_6	GE7-1-T30	GE3-2-T0	48			Collinsella_aerofaciens	P29-1	P54-2	18
Bacteroides_sp_1_1_6	GE7-1-T30	GE3-1-T0	48			Collinsella_aerofaciens	P7-2	P82-2	16
Bacteroides_sp_1_1_6	GE7-2-T0	GE3-2-T30	45			Collinsella_aerofaciens	P29-1	P53-2	16
Bacteroides_sp_1_1_6	GE7-2-T30	GE3-1-T30	45			Collinsella_aerofaciens	P47-2	P97-2	16
Bacteroides_sp_1_1_6	GE3-2-T7	GE7-1-T0	45			Collinsella_aerofaciens	P47-2	P82-2	15
Bacteroides_sp_1_1_6	GE7-1-T30	GE3-1-T7	44			Collinsella_aerofaciens	P29-1	P54-1	15
Bacteroides_sp_1_1_6	GE7-2-T0	GE3-2-T0	43			Collinsella_aerofaciens	P7-2	P97-2	15
Bacteroides_sp_1_1_6	GE7-2-T30	GE3-2-T30	42			Collinsella_aerofaciens	P54-2	P82-2	14
Bacteroides_sp_1_1_6	GE7-2-T0	GE3-1-T0	42			Collinsella_aerofaciens	P47-1	P97-2	14
Bacteroides_sp_1_1_6	GE7-2-T30	GE3-2-T0	39			Collinsella_aerofaciens	P47-1	P82-2	13
Bacteroides_sp_1_1_6	GE7-2-T0	GE3-1-T7	39			Collinsella_aerofaciens	P29-1	P5-2	13
Bacteroides_sp_1_1_6	GE7-2-T30	GE3-1-T0	39			Collinsella_aerofaciens	P29-1	P5-1	13
Bacteroides_sp_1_1_6	GE3-2-T7	GE7-2-T7	39			Collinsella_aerofaciens	P29-1	P7-1	13
Bacteroides_sp_1_1_6	GE7-2-T30	GE3-1-T7	36			Collinsella_aerofaciens	P29-1	P97-1	13
Bacteroides_sp_1_1_6	GE7-1-T30	GE4-1-T30	35			Collinsella_aerofaciens	P54-2	P97-2	13
Bacteroides_sp_1_1_6	GE7-2-T0	GE4-1-T30	35			Collinsella_aerofaciens	P29-2	P54-1	12
Bacteroides_sp_1_1_6	NL1-2-T28	GE4-1-T30	35			Collinsella_aerofaciens	P29-1	P82-1	11
Bacteroides_sp_1_1_6	NL1-1-T7	GE4-1-T30	33			Collinsella_aerofaciens	P54-1	P97-2	11
Bacteroides_sp_1_1_6	GE7-2-T30	GE4-1-T30	33			Collinsella_aerofaciens	P47-2	P7-2	10
Bacteroides_sp_1_1_6	NL1-2-T7	GE4-1-T30	32			Collinsella_aerofaciens	P54-1	P82-2	10
Bacteroides_sp_1_1_6	NL1-2-T0	GE4-1-T30	31			Collinsella_aerofaciens	P29-2	P97-1	10
Bacteroides_sp_1_1_6	GE7-1-T30	NL1-2-T28	30			Collinsella_aerofaciens	P29-1	P53-1	10
Bacteroides_sp_1_1_6	GE7-2-T0	NL1-2-T28	30			Collinsella_aerofaciens	P7-1	P97-2	10
Bacteroides_sp_1_1_6	GE7-2-T30	NL1-2-T28	28			Collinsella_aerofaciens	P5-1	P97-2	10
Bacteroides_sp_1_1_6	GE7-2-T0	NL1-1-T7	27			Collinsella_aerofaciens	P54-2	P7-2	9
Bacteroides_sp_1_1_6	GE7-2-T0	NL1-2-T0	26			Collinsella_aerofaciens	P29-2	P7-1	9
Bacteroides_sp_1_1_6	GE7-2-T0	NL1-2-T7	26			Collinsella_aerofaciens	P29-2	P82-1	9
Bacteroides_sp_1_1_6	GE7-1-T30	GE3-2-T7	26			Collinsella_aerofaciens	P5-2	P97-2	9
Bacteroides_sp_1_1_6	NL1-2-T28	GE4-2-T7	26			Collinsella_aerofaciens	P53-1	P97-2	9
Bacteroides_sp_1_1_6	GE7-1-T30	NL1-2-T7	25			Collinsella_aerofaciens	P97-1	P97-2	9
Bacteroides_sp_1_1_6	GE7-1-T30	NL1-1-T7	25			Collinsella_aerofaciens	P53-2	P97-2	9
Bacteroides_sp_1_1_6	GE7-1-T30	GE4-2-T7	25			Collinsella_aerofaciens	P47-1	P7-2	8
Bacteroides_sp_1_1_6	GE7-2-T0	GE4-2-T7	25			Collinsella_aerofaciens	P47-2	P54-2	8
Bacteroides_sp_1_1_6	NL1-2-T7	GE7-2-T30	25			Collinsella_aerofaciens	P29-2	P5-2	8
Bacteroides_sp_1_1_6	NL1-1-T7	GE7-2-T30	25			Collinsella_aerofaciens	P29-2	P53-1	8
Bacteroides_sp_1_1_6	GE7-1-T30	NL1-2-T0	24			Collinsella_aerofaciens	P5-1	P82-2	8
Bacteroides_sp_1_1_6	NL1-2-T28	GE4-2-T30	24			Collinsella_aerofaciens	P29-2	P5-1	8
Bacteroides_sp_1_1_6	NL1-1-T7	GE4-2-T7	24			Collinsella_aerofaciens	P53-2	P82-2	8
Bacteroides_sp_1_1_6	GE7-2-T30	GE4-2-T7	24			Collinsella_aerofaciens	P29-2	P53-2	8
Bacteroides_sp_1_1_6	GE3-2-T7	GE7-2-T30	24			Collinsella_aerofaciens	P82-1	P97-2	8
Bacteroides_sp_1_1_6	NL1-2-T0	GE7-2-T30	24			Collinsella_aerofaciens	P5-2	P82-2	7
Bacteroides_sp_1_1_6	GE7-2-T0	GE3-2-T7	23			Collinsella_aerofaciens	P82-2	P97-1	7
Bacteroides_sp_1_1_6	GE7-1-T30	GE4-2-T30	23			Collinsella_aerofaciens	P47-1	P54-2	6
Bacteroides_sp_1_1_6	GE7-2-T0	GE4-2-T30	23			Collinsella_aerofaciens	P7-1	P82-2	6
Bacteroides_sp_1_1_6	NL1-2-T0	GE4-2-T7	23			Collinsella_aerofaciens	P53-1	P82-2	6
Bacteroides_sp_1_1_6	NL1-2-T7	GE4-2-T7	23			Collinsella_aerofaciens	P7-2	P97-1	5
Bacteroides_sp_1_1_6	NL1-1-T7	GE4-2-T30	22			Collinsella_aerofaciens	P5-2	P7-2	4
Bacteroides_sp_1_1_6	GE7-2-T30	GE4-2-T30	22			Collinsella_aerofaciens	P54-1	P7-2	4
Bacteroides_sp_1_1_6	GE4-2-T0	NL1-2-T28	21			Collinsella_aerofaciens	P7-2	P82-1	4
Bacteroides_sp_1_1_6	NL1-2-T0	GE4-2-T30	21			Collinsella_aerofaciens	P47-1	P54-1	4
Bacteroides_sp_1_1_6	NL1-2-T7	GE4-2-T30	21			Collinsella_aerofaciens	P5-2	P54-2	4
Bacteroides_sp_1_1_6	GE7-2-T0	GE4-2-T0	20			Collinsella_aerofaciens	P47-2	P54-1	4
Bacteroides_sp_1_1_6	GE4-2-T0	GE7-2-T30	20			Collinsella_aerofaciens	P53-2	P7-2	4
Bacteroides_sp_1_1_6	GE7-1-T30	GE4-2-T0	19			Collinsella_aerofaciens	P53-2	P54-2	4
Bacteroides_sp_1_1_6	NL1-1-T7	GE4-2-T0	19			Collinsella_aerofaciens	P5-2	P54-1	3
Bacteroides_sp_1_1_6	NL1-2-T7	GE4-2-T0	18			Collinsella_aerofaciens	P5-1	P7-2	3
Bacteroides_sp_1_1_6	NL1-2-T0	GE4-2-T0	18			Collinsella_aerofaciens	P54-2	P82-1	3
Bacteroides_sp_1_1_6	GE7-2-T7	GE4-1-T30	7			Collinsella_aerofaciens	P54-2	P7-1	3
Bacteroides_sp_1_1_6	GE7-2-T7	NL1-2-T7	7			Collinsella_aerofaciens	P47-2	P53-1	3
Bacteroides_sp_1_1_6	GE7-2-T7	NL1-1-T7	7			Collinsella_aerofaciens	P54-2	P97-1	3
Bacteroides_sp_1_1_6	GE7-2-T7	NL1-2-T28	7			Collinsella_aerofaciens	P47-1	P97-1	3
Bacteroides_sp_1_1_6	GE3-2-T7	GE4-1-T30	6			Collinsella_aerofaciens	P47-2	P53-2	3
Bacteroides_sp_1_1_6	GE3-2-T7	GE4-2-T7	6			Collinsella_aerofaciens	P47-2	P97-1	3
Bacteroides_sp_1_1_6	GE7-2-T7	GE4-2-T0	6			Collinsella_aerofaciens	P53-1	P53-2	3
Bacteroides_sp_1_1_6	GE7-2-T7	GE4-2-T30	6			Collinsella_aerofaciens	P53-1	P7-2	2
Bacteroides_sp_1_1_6	GE7-2-T7	GE4-2-T7	6			Collinsella_aerofaciens	P47-1	P5-2	2
Bacteroides_sp_1_1_6	GE7-2-T7	NL1-2-T0	6			Collinsella_aerofaciens	P47-1	P7-1	2
Bacteroides_sp_1_1_6	GE3-2-T7	GE4-2-T0	5			Collinsella_aerofaciens	P47-2	P5-2	2
Bacteroides_sp_1_1_6	GE3-2-T7	GE4-2-T30	5			Collinsella_aerofaciens	P5-2	P7-1	2
Bacteroides_sp_1_1_6	GE3-2-T0	GE4-2-T7	4			Collinsella_aerofaciens	P5-2	P82-1	2
Bacteroides_sp_1_1_6	GE3-1-T0	GE4-2-T7	4			Collinsella_aerofaciens	P54-1	P7-1	2
Bacteroides_sp_1_1_6	GE4-2-T7	GE3-1-T30	4			Collinsella_aerofaciens	P47-1	P82-1	2
Bacteroides_sp_1_1_6	GE3-2-T7	NL1-2-T7	4			Collinsella_aerofaciens	P47-2	P7-1	2
Bacteroides_sp_1_1_6	GE3-2-T7	NL1-2-T0	4			Collinsella_aerofaciens	P47-2	P82-1	2
Bacteroides_sp_1_1_6	GE3-2-T7	NL1-1-T7	4			Collinsella_aerofaciens	P5-1	P82-1	2
Bacteroides_sp_1_1_6	GE7-1-T7	GE4-2-T7	4			Collinsella_aerofaciens	P5-2	P97-1	2
Bacteroides_sp_1_1_6	GE3-2-T7	NL1-2-T28	4			Collinsella_aerofaciens	P53-1	P54-1	2
Bacteroides_sp_1_1_6	GE3-2-T0	GE4-1-T30	3			Collinsella_aerofaciens	P53-1	P54-2	2
Bacteroides_sp_1_1_6	GE3-1-T7	GE4-2-T7	3			Collinsella_aerofaciens	P54-1	P82-1	2
Bacteroides_sp_1_1_6	GE7-1-T0	NL1-2-T28	3			Collinsella_aerofaciens	P7-1	P82-1	2
Bacteroides_sp_1_1_6	GE4-2-T0	GE3-2-T0	3			Collinsella_aerofaciens	P47-1	P53-1	2
Bacteroides_sp_1_1_6	GE4-2-T30	GE3-2-T0	3			Collinsella_aerofaciens	P47-2	P5-1	2
Bacteroides_sp_1_1_6	GE4-2-T30	GE3-1-T0	3			Collinsella_aerofaciens	P5-1	P54-1	2
Bacteroides_sp_1_1_6	GE4-2-T30	GE3-1-T30	3			Collinsella_aerofaciens	P5-1	P54-2	2
Bacteroides_sp_1_1_6	GE4-2-T7	GE3-2-T30	3			Collinsella_aerofaciens	P5-1	P7-1	2
Bacteroides_sp_1_1_6	GE7-1-T0	GE4-1-T30	3			Collinsella_aerofaciens	P53-2	P54-1	2
Bacteroides_sp_1_1_6	GE7-1-T0	GE4-2-T7	3			Collinsella_aerofaciens	P53-2	P82-1	2
Bacteroides_sp_1_1_6	GE4-1-T30	GE7-1-T7	3			Collinsella_aerofaciens	P54-1	P97-1	2
Bacteroides_sp_1_1_6	NL1-1-T7	GE3-2-T0	3			Collinsella_aerofaciens	P47-1	P53-2	2
Bacteroides_sp_1_1_6	NL1-2-T28	GE3-2-T0	3			Collinsella_aerofaciens	P5-1	P53-2	2
Bacteroides_sp_1_1_6	NL1-1-T7	GE3-1-T0	3			Collinsella_aerofaciens	P5-1	P97-1	2
Bacteroides_sp_1_1_6	NL1-2-T28	GE3-1-T0	3			Collinsella_aerofaciens	P53-2	P97-1	2
Bacteroides_sp_1_1_6	NL1-1-T7	GE3-1-T30	3			Collinsella_aerofaciens	P5-2	P53-1	1
Bacteroides_sp_1_1_6	NL1-2-T28	GE3-1-T30	3			Collinsella_aerofaciens	P82-1	P97-1	1
Bacteroides_sp_1_1_6	NL1-2-T28	GE7-1-T7	3			Collinsella_aerofaciens	P47-1	P5-1	1
Bacteroides_sp_1_1_6	GE3-1-T7	GE4-1-T30	2			Collinsella_aerofaciens	P5-1	P5-2	1
Bacteroides_sp_1_1_6	GE4-2-T0	GE3-1-T7	2			Collinsella_aerofaciens	P5-2	P53-2	1
Bacteroides_sp_1_1_6	GE4-2-T30	GE3-1-T7	2			Collinsella_aerofaciens	P53-1	P7-1	1
Bacteroides_sp_1_1_6	GE4-2-T0	GE3-2-T30	2			Collinsella_aerofaciens	P53-1	P82-1	1
Bacteroides_sp_1_1_6	GE4-2-T0	GE3-1-T0	2			Collinsella_aerofaciens	P7-1	P97-1	1
Bacteroides_sp_1_1_6	GE4-2-T30	GE3-2-T30	2			Collinsella_aerofaciens	P5-1	P53-1	1
Bacteroides_sp_1_1_6	GE4-1-T30	GE3-2-T30	2			Collinsella_aerofaciens	P53-1	P97-1	1
Bacteroides_sp_1_1_6	GE4-1-T30	GE3-1-T0	2			Collinsella_aerofaciens	P53-2	P7-1	1
Bacteroides_sp_1_1_6	GE4-2-T0	GE3-1-T30	2			Coprococcus_eutactus	P7-1	P7-2	98
Bacteroides_sp_1_1_6	GE4-1-T30	GE3-1-T30	2			Coprococcus_eutactus	P29-2	P54-2	35
Bacteroides_sp_1_1_6	GE7-1-T0	NL1-1-T7	2			Coprococcus_eutactus	P29-2	P5-1	33
Bacteroides_sp_1_1_6	NL1-2-T0	GE3-2-T0	2			Coprococcus_eutactus	P29-1	P54-2	31
Bacteroides_sp_1_1_6	NL1-2-T7	GE3-2-T0	2			Coprococcus_eutactus	P29-1	P5-1	31
Bacteroides_sp_1_1_6	NL1-2-T7	GE3-1-T7	2			Coprococcus_eutactus	P29-2	P7-2	31
Bacteroides_sp_1_1_6	GE7-1-T0	GE4-2-T0	2			Coprococcus_eutactus	P29-1	P7-1	30
Bacteroides_sp_1_1_6	GE7-1-T0	GE4-2-T30	2			Coprococcus_eutactus	P29-1	P29-2	30
Bacteroides_sp_1_1_6	NL1-1-T7	GE3-1-T7	2			Coprococcus_eutactus	P29-2	P7-1	30
Bacteroides_sp_1_1_6	NL1-2-T28	GE3-1-T7	2			Coprococcus_eutactus	P29-1	P7-2	29
Bacteroides_sp_1_1_6	NL1-2-T0	GE3-1-T0	2			Coprococcus_eutactus	P5-1	P7-1	29
Bacteroides_sp_1_1_6	NL1-2-T7	GE3-1-T0	2			Coprococcus_eutactus	P5-1	P7-2	29
Bacteroides_sp_1_1_6	NL1-2-T0	GE3-1-T30	2			Coprococcus_eutactus	P54-2	P7-1	28
Bacteroides_sp_1_1_6	NL1-2-T7	GE3-1-T30	2			Coprococcus_eutactus	P5-1	P54-2	28
Bacteroides_sp_1_1_6	GE4-2-T0	GE7-1-T7	2			Coprococcus_eutactus	P54-2	P7-2	28
Bacteroides_sp_1_1_6	GE4-2-T30	GE7-1-T7	2			Coprococcus_eutactus	P53-1	P53-2	20
Bacteroides_sp_1_1_6	NL1-2-T0	GE7-1-T0	2			Coprococcus_eutactus	P29-1	P53-2	2
Bacteroides_sp_1_1_6	NL1-2-T7	GE7-1-T0	2			Coprococcus_eutactus	P53-2	P54-2	2
Bacteroides_sp_1_1_6	NL1-2-T0	GE7-1-T7	2			Coprococcus_eutactus	P5-1	P53-2	2
Bacteroides_sp_1_1_6	NL1-2-T7	GE7-1-T7	2			Coprococcus_eutactus	P5-1	P53-1	2
Bacteroides_sp_1_1_6	NL1-1-T7	GE7-1-T7	2			Coprococcus_eutactus	P53-2	P7-2	2
Bacteroides_sp_1_1_6	NL1-2-T0	GE3-1-T7	1			Coprococcus_eutactus	P29-2	P53-2	2
Bacteroides_sp_1_1_6	NL1-2-T0	GE3-2-T30	1			Coprococcus_eutactus	P29-2	P53-1	2
Bacteroides_sp_1_1_6	NL1-2-T7	GE3-2-T30	1			Coprococcus_eutactus	P53-1	P54-2	1
Bacteroides_sp_1_1_6	NL1-1-T7	GE3-2-T30	1			Coprococcus_eutactus	P29-1	P53-1	1
Bacteroides_sp_1_1_6	NL1-2-T28	GE3-2-T30	1			Coprococcus_eutactus	P53-2	P7-1	1
Bacteroides_sp_2_1_16	GE7-1-T0	GE7-1-T7	100			Coprococcus_eutactus	P53-1	P7-1	1
Bacteroides_sp_2_1_16	GE7-1-T0	GE7-1-T30	100			Coprococcus_eutactus	P53-1	P7-2	1
Bacteroides_sp_2_1_16	GE7-1-T7	GE7-1-T30	100			Dialister_invisus	P7-1	P82-1	1
Bacteroides_sp_2_1_16	GE7-2-T0	GE7-2-T7	100			Dialister_invisus	P7-1	P97-2	2
Bacteroides_sp_2_1_16	GE7-2-T0	GE7-2-T30	100			Dialister_invisus	P82-1	P97-2	23
Bacteroides_sp_2_1_16	GE7-2-T7	GE7-2-T30	100			Eubacterium_eligens	P47-1	P47-2	100
Bacteroides_sp_2_1_16	GE4-1-T7	GE4-2-T0	100			Eubacterium_eligens	P53-1	P53-2	97
Bacteroides_sp_2_1_16	GE4-2-T0	GE4-2-T30	100			Eubacterium_eligens	P53-2	P7-1	97
Bacteroides_sp_2_1_16	GE4-1-T7	GE4-2-T30	100			Eubacterium_eligens	P53-1	P7-1	97
Bacteroides_sp_2_1_16	GE4-1-T7	GE4-2-T7	100			Eubacterium_eligens	P82-1	P82-2	96
Bacteroides_sp_2_1_16	GE4-2-T0	GE4-2-T7	100			Eubacterium_eligens	P53-2	P82-2	44
Bacteroides_sp_2_1_16	GE4-2-T7	GE4-2-T30	100			Eubacterium_eligens	P47-2	P82-2	40
Bacteroides_sp_2_1_16	GE7-1-T0	GE7-2-T0	7			Eubacterium_eligens	P53-2	P7-2	37
Bacteroides_sp_2_1_16	GE7-1-T0	GE7-2-T7	7			Eubacterium_eligens	P7-2	P82-2	37
Bacteroides_sp_2_1_16	GE7-1-T0	GE7-2-T30	7			Eubacterium_eligens	P47-1	P82-2	35
Bacteroides_sp_2_1_16	GE7-2-T0	GE7-1-T7	7			Eubacterium_eligens	P7-1	P7-2	34
Bacteroides_sp_2_1_16	GE7-2-T0	GE7-1-T30	7			Eubacterium_eligens	P47-2	P7-2	34
Bacteroides_sp_2_1_16	GE7-1-T7	GE7-2-T7	7			Eubacterium_eligens	P47-2	P53-2	33
Bacteroides_sp_2_1_16	GE7-1-T7	GE7-2-T30	7			Eubacterium_eligens	P53-1	P7-2	33
Bacteroides_sp_2_1_16	GE7-2-T7	GE7-1-T30	7			Eubacterium_eligens	P47-2	P82-1	32
Bacteroides_sp_2_1_16	GE7-1-T30	GE7-2-T30	7			Eubacterium_eligens	P54-2	P82-2	32
Bacteroides_sp_2_1_16	GE7-1-T0	GE4-1-T7	2			Eubacterium_eligens	P5-2	P82-2	30
Bacteroides_sp_2_1_16	GE7-1-T7	GE4-1-T7	2			Eubacterium_eligens	P47-1	P7-2	29
Bacteroides_sp_2_1_16	GE7-1-T30	GE4-1-T7	2			Eubacterium_eligens	P54-1	P82-2	28
Bacteroides_sp_2_1_16	GE7-1-T0	GE4-2-T0	2			Eubacterium_eligens	P82-2	P97-1	28
Bacteroides_sp_2_1_16	GE7-1-T7	GE4-2-T0	2			Eubacterium_eligens	P82-2	P97-2	28
Bacteroides_sp_2_1_16	GE7-1-T30	GE4-2-T0	2			Eubacterium_eligens	P7-1	P82-2	28
Bacteroides_sp_2_1_16	GE7-1-T0	GE4-2-T30	2			Eubacterium_eligens	P7-2	P82-1	28
Bacteroides_sp_2_1_16	GE7-1-T7	GE4-2-T30	2			Eubacterium_eligens	P5-2	P7-2	28
Bacteroides_sp_2_1_16	GE7-1-T30	GE4-2-T30	2			Eubacterium_eligens	P47-2	P53-1	27
Bacteroides_sp_2_1_16	GE7-1-T0	GE4-2-T7	2			Eubacterium_eligens	P47-2	P7-1	27
Bacteroides_sp_2_1_16	GE7-1-T7	GE4-2-T7	2			Eubacterium_eligens	P47-1	P82-1	26
Bacteroides_sp_2_1_16	GE7-1-T30	GE4-2-T7	2			Eubacterium_eligens	P47-2	P5-2	26
Bacteroides_sp_2_1_16	GE7-2-T0	GE4-1-T7	1			Eubacterium_eligens	P47-2	P54-2	26
Bacteroides_sp_2_1_16	GE7-2-T7	GE4-1-T7	1			Eubacterium_eligens	P53-1	P82-2	26
Bacteroides_sp_2_1_16	GE7-2-T30	GE4-1-T7	1			Eubacterium_eligens	P54-2	P7-2	26
Bacteroides_sp_2_1_16	GE7-2-T0	GE4-2-T0	1			Eubacterium_eligens	P5-2	P53-2	25
Bacteroides_sp_2_1_16	GE7-2-T7	GE4-2-T0	1			Eubacterium_eligens	P47-2	P97-1	25
Bacteroides_sp_2_1_16	GE7-2-T30	GE4-2-T0	1			Eubacterium_eligens	P54-1	P7-2	25
Bacteroides_sp_2_1_16	GE7-2-T0	GE4-2-T30	1			Eubacterium_eligens	P29-1	P7-2	24
Bacteroides_sp_2_1_16	GE7-2-T7	GE4-2-T30	1			Eubacterium_eligens	P7-2	P97-1	24
Bacteroides_sp_2_1_16	GE7-2-T30	GE4-2-T30	1			Eubacterium_eligens	P7-2	P97-2	24
Bacteroides_sp_2_1_16	GE7-2-T0	GE4-2-T7	1			Eubacterium_eligens	P47-1	P53-2	23
Bacteroides_sp_2_1_16	GE7-2-T7	GE4-2-T7	1			Eubacterium_eligens	P29-1	P82-2	23
Bacteroides_sp_2_1_16	GE7-2-T30	GE4-2-T7	1			Eubacterium_eligens	P47-2	P54-1	23
Bacteroides_stercoris	GE3-2-T7	GE3-2-T30	100			Eubacterium_eligens	P47-2	P97-2	23
Bacteroides_stercoris	NL1-2-T28	NL1-2-T0	100			Eubacterium_eligens	P53-2	P54-2	22
Bacteroides_stercoris	GE7-1-T7	GE7-1-T0	100			Eubacterium_eligens	P54-2	P82-1	22
Bacteroides_stercoris	GE7-1-T7	GE7-1-T30	100			Eubacterium_eligens	P29-1	P47-2	22
Bacteroides_stercoris	GE7-1-T0	GE7-1-T30	100			Eubacterium_eligens	P53-2	P54-1	21
Bacteroides_stercoris	NL1-2-T28	NL1-2-T7	100			Eubacterium_eligens	P53-2	P82-1	21
Bacteroides_stercoris	NL1-2-T0	NL1-2-T7	100			Eubacterium_eligens	P47-1	P5-2	21
Bacteroides_stercoris	GE7-1-T7	GE7-2-T0	99			Eubacterium_eligens	P5-2	P53-1	21
Bacteroides_stercoris	GE7-1-T0	GE7-2-T0	99			Eubacterium_eligens	P5-2	P7-1	21
Bacteroides_stercoris	GE7-1-T30	GE7-2-T0	99			Eubacterium_eligens	P5-2	P97-2	21
Bacteroides_stercoris	GE7-2-T0	GE7-2-T30	42			Eubacterium_eligens	P54-1	P97-1	20
Bacteroides_stercoris	GE7-1-T7	GE7-2-T30	38			Eubacterium_eligens	P5-2	P82-1	20
Bacteroides_stercoris	GE7-1-T0	GE7-2-T30	38			Eubacterium_eligens	P29-1	P53-2	19
Bacteroides_stercoris	GE7-1-T30	GE7-2-T30	38			Eubacterium_eligens	P29-1	P54-1	19
Bacteroides_stercoris	GE3-2-T7	NL1-2-T7	10			Eubacterium_eligens	P47-1	P97-1	19
Bacteroides_stercoris	GE3-2-T30	NL1-2-T7	10			Eubacterium_eligens	P5-2	P54-1	19
Bacteroides_stercoris	NL1-2-T0	GE3-2-T30	8			Eubacterium_eligens	P54-1	P82-1	19
Bacteroides_stercoris	GE3-2-T7	NL1-2-T0	8			Eubacterium_eligens	P54-1	P97-2	19
Bacteroides_stercoris	NL1-2-T7	GE7-2-T30	8			Eubacterium_eligens	P53-2	P97-2	19
Bacteroides_stercoris	NL1-2-T28	GE3-2-T30	7			Eubacterium_eligens	P47-1	P54-2	19
Bacteroides_stercoris	GE3-2-T7	NL1-2-T28	7			Eubacterium_eligens	P5-2	P54-2	19
Bacteroides_stercoris	NL1-2-T28	GE7-2-T30	7			Eubacterium_eligens	P54-2	P7-1	19
Bacteroides_stercoris	NL1-2-T0	GE7-2-T30	7			Eubacterium_eligens	P47-1	P53-1	19
Bacteroides_stercoris	GE3-2-T7	GE7-2-T30	4			Eubacterium_eligens	P53-2	P97-1	18
Bacteroides_stercoris	GE3-2-T30	GE7-2-T30	4			Eubacterium_eligens	P47-1	P54-1	18
Bacteroides_stercoris	GE7-1-T7	NL1-2-T28	3			Eubacterium_eligens	P82-1	P97-1	18
Bacteroides_stercoris	GE7-1-T0	NL1-2-T28	3			Eubacterium_eligens	P97-1	P97-2	18
Bacteroides_stercoris	GE7-1-T0	NL1-2-T0	3			Eubacterium_eligens	P53-1	P54-1	18
Bacteroides_stercoris	GE7-1-T7	NL1-2-T0	3			Eubacterium_eligens	P54-1	P54-2	18
Bacteroides_stercoris	GE7-1-T7	NL1-2-T7	3			Eubacterium_eligens	P54-2	P97-1	18
Bacteroides_stercoris	GE7-1-T0	NL1-2-T7	3			Eubacterium_eligens	P7-1	P82-1	18
Bacteroides_stercoris	GE7-1-T30	NL1-2-T0	3			Eubacterium_eligens	P82-1	P97-2	18
Bacteroides_stercoris	GE7-1-T30	NL1-2-T7	3			Eubacterium_eligens	P47-1	P7-1	18
Bacteroides_stercoris	GE7-2-T0	NL1-2-T7	3			Eubacterium_eligens	P53-1	P54-2	18
Bacteroides_stercoris	NL1-2-T28	GE7-1-T30	3			Eubacterium_eligens	P54-1	P7-1	17
Bacteroides_stercoris	NL1-2-T28	GE7-2-T0	3			Eubacterium_eligens	P47-1	P97-2	17
Bacteroides_stercoris	NL1-2-T0	GE7-2-T0	3			Eubacterium_eligens	P53-1	P82-1	17
Bacteroides_stercoris	GE3-2-T7	GE7-2-T0	2			Eubacterium_eligens	P5-2	P97-1	16
Bacteroides_stercoris	GE3-2-T7	GE7-1-T30	1			Eubacterium_eligens	P29-1	P5-2	16
Bacteroides_stercoris	GE7-1-T7	GE3-2-T7	1			Eubacterium_eligens	P29-1	P47-1	16
Bacteroides_stercoris	GE7-1-T0	GE3-2-T7	1			Eubacterium_eligens	P29-1	P97-2	16
Bacteroides_stercoris	GE7-1-T7	GE3-2-T30	1			Eubacterium_eligens	P53-1	P97-1	16
Bacteroides_stercoris	GE7-1-T0	GE3-2-T30	1			Eubacterium_eligens	P29-1	P53-1	16
Bacteroides_stercoris	GE7-1-T30	GE3-2-T30	1			Eubacterium_eligens	P29-1	P7-1	16
Bacteroides_stercoris	GE7-2-T0	GE3-2-T30	1			Eubacterium_eligens	P7-1	P97-2	16
Bacteroides_uniformis	NL1-2-T28	NL1-2-T7	100			Eubacterium_eligens	P53-1	P97-2	16
Bacteroides_uniformis	GE7-1-T30	GE7-1-T7	100			Eubacterium_eligens	P7-1	P97-1	15
Bacteroides_uniformis	GE7-1-T30	GE7-1-T0	100			Eubacterium_eligens	P29-1	P82-1	15
Bacteroides_uniformis	GE7-1-T30	GE7-2-T30	100			Eubacterium_eligens	P54-2	P97-2	15
Bacteroides_uniformis	GE7-1-T30	GE7-2-T0	100			Eubacterium_eligens	P29-1	P54-2	15
Bacteroides_uniformis	GE7-1-T30	GE7-2-T7	100			Eubacterium_eligens	P29-1	P97-1	14
Bacteroides_uniformis	GE3-1-T0	GE3-1-T30	100			Eubacterium_eligens	P29-2	P82-2	14
Bacteroides_uniformis	GE4-2-T30	GE4-1-T30	100			Eubacterium_eligens	P29-2	P53-2	12
Bacteroides_uniformis	GE4-2-T30	GE4-2-T7	100			Eubacterium_eligens	P29-2	P7-2	6
Bacteroides_uniformis	GE4-1-T30	GE4-2-T7	100			Eubacterium_eligens	P29-2	P82-1	4
Bacteroides_uniformis	GE7-2-T30	GE7-2-T0	100			Eubacterium_eligens	P29-2	P97-1	3
Bacteroides_uniformis	GE7-2-T30	GE7-2-T7	100			Eubacterium_eligens	P29-2	P53-1	3
Bacteroides_uniformis	GE7-2-T0	GE7-2-T7	100			Eubacterium_eligens	P29-2	P47-2	3
Bacteroides_uniformis	GE7-1-T7	GE7-1-T0	100			Eubacterium_eligens	P29-2	P54-1	2
Bacteroides_uniformis	GE7-1-T7	GE7-2-T30	100			Eubacterium_eligens	P29-1	P29-2	2
Bacteroides_uniformis	GE7-1-T7	GE7-2-T0	100			Eubacterium_eligens	P29-2	P47-1	2
Bacteroides_uniformis	GE7-1-T7	GE7-2-T7	100			Eubacterium_eligens	P29-2	P5-2	2
Bacteroides_uniformis	GE7-1-T0	GE7-2-T30	100			Eubacterium_eligens	P29-2	P97-2	2
Bacteroides_uniformis	GE7-1-T0	GE7-2-T0	100			Eubacterium_eligens	P29-2	P54-2	2
Bacteroides_uniformis	GE7-1-T0	GE7-2-T7	100			Eubacterium_eligens	P29-2	P7-1	2
Bacteroides_uniformis	GE3-2-T0	GE3-1-T7	100			Eubacterium_rectale	P47-1	P47-2	95
Bacteroides_uniformis	GE3-2-T0	GE3-1-T0	100			Eubacterium_rectale	P54-1	P54-2	82
Bacteroides_uniformis	GE3-2-T0	GE3-1-T30	100			Eubacterium_rectale	P47-1	P97-2	36
Bacteroides_uniformis	GE4-2-T0	GE4-2-T30	100			Eubacterium_rectale	P5-1	P53-1	27
Bacteroides_uniformis	GE4-2-T0	GE4-1-T30	100			Eubacterium_rectale	P47-1	P5-2	26
Bacteroides_uniformis	GE4-2-T0	GE4-2-T7	100			Eubacterium_rectale	P47-2	P97-2	25
Bacteroides_uniformis	GE3-1-T7	GE3-1-T0	100			Eubacterium_rectale	P54-1	P97-2	25
Bacteroides_uniformis	GE3-1-T7	GE3-1-T30	100			Eubacterium_rectale	P29-2	P53-1	24
Bacteroides_uniformis	NL1-1-T0	NL1-1-T7	100			Eubacterium_rectale	P29-2	P5-1	24
Bacteroides_uniformis	GE3-2-T7	GE3-2-T30	100			Eubacterium_rectale	P47-1	P54-1	24
Bacteroides_uniformis	NL1-1-T0	NL1-1-T28	99			Eubacterium_rectale	P47-2	P54-1	23
Bacteroides_uniformis	NL1-2-T0	NL1-2-T28	99			Eubacterium_rectale	P54-1	P82-1	19
Bacteroides_uniformis	NL1-2-T0	NL1-2-T7	99			Eubacterium_rectale	P29-2	P54-1	17
Bacteroides_uniformis	NL1-1-T7	NL1-1-T28	97			Eubacterium_rectale	P54-1	P82-2	17
Bacteroides_uniformis	NL1-1-T0	GE3-1-T30	96			Eubacterium_rectale	P29-1	P54-1	17
Bacteroides_uniformis	NL1-1-T0	GE3-2-T0	95			Eubacterium_rectale	P47-1	P82-1	16
Bacteroides_uniformis	NL1-1-T0	GE3-1-T7	95			Eubacterium_rectale	P5-1	P54-1	16
Bacteroides_uniformis	NL1-1-T0	GE3-1-T0	95			Eubacterium_rectale	P29-2	P47-1	15
Bacteroides_uniformis	GE3-1-T0	NL1-1-T7	94			Eubacterium_rectale	P29-1	P47-1	15
Bacteroides_uniformis	GE3-1-T30	NL1-1-T7	94			Eubacterium_rectale	P47-2	P5-2	15
Bacteroides_uniformis	GE3-2-T0	NL1-1-T7	94			Eubacterium_rectale	P53-1	P54-1	15
Bacteroides_uniformis	GE3-1-T7	NL1-1-T7	94			Eubacterium_rectale	P53-1	P82-1	14
Bacteroides_uniformis	GE3-1-T30	NL1-1-T28	92			Eubacterium_rectale	P29-2	P82-1	14
Bacteroides_uniformis	GE3-1-T0	NL1-1-T28	91			Eubacterium_rectale	P47-2	P82-1	14
Bacteroides_uniformis	GE3-2-T0	NL1-1-T28	91			Eubacterium_rectale	P29-2	P47-2	14
Bacteroides_uniformis	GE3-1-T7	NL1-1-T28	91			Eubacterium_rectale	P47-1	P53-1	14
Bacteroides_uniformis	NL1-2-T0	NL1-1-T28	33			Eubacterium_rectale	P47-2	P5-1	14
Bacteroides_uniformis	NL1-2-T28	NL1-1-T28	33			Eubacterium_rectale	P47-1	P5-1	14
Bacteroides_uniformis	NL1-2-T7	NL1-1-T28	33			Eubacterium_rectale	P47-2	P53-1	13
Bacteroides_uniformis	GE7-2-T7	NL1-1-T28	32			Eubacterium_rectale	P47-1	P82-2	13
Bacteroides_uniformis	NL1-1-T28	GE3-2-T30	32			Eubacterium_rectale	P5-1	P82-1	13
Bacteroides_uniformis	GE7-1-T30	NL1-1-T28	31			Eubacterium_rectale	P29-1	P47-2	13
Bacteroides_uniformis	GE7-2-T30	NL1-1-T28	31			Eubacterium_rectale	P47-1	P53-2	12
Bacteroides_uniformis	GE7-2-T0	NL1-1-T28	31			Eubacterium_rectale	P47-2	P82-2	12
Bacteroides_uniformis	GE7-1-T7	NL1-1-T28	31			Eubacterium_rectale	P47-1	P7-1	12
Bacteroides_uniformis	GE7-1-T0	NL1-1-T28	31			Eubacterium_rectale	P5-2	P54-1	12
Bacteroides_uniformis	NL1-1-T28	GE3-2-T7	31			Eubacterium_rectale	P53-1	P82-2	11
Bacteroides_uniformis	GE4-2-T0	NL1-1-T28	28			Eubacterium_rectale	P29-1	P97-2	11
Bacteroides_uniformis	GE4-1-T30	NL1-1-T28	28			Eubacterium_rectale	P53-2	P54-1	11
Bacteroides_uniformis	GE4-2-T7	NL1-1-T28	28			Eubacterium_rectale	P82-1	P97-2	10
Bacteroides_uniformis	GE4-2-T30	NL1-1-T28	27			Eubacterium_rectale	P82-1	P82-2	10
Bacteroides_uniformis	NL1-2-T0	NL1-1-T0	27			Eubacterium_rectale	P47-1	P54-2	10
Bacteroides_uniformis	NL1-2-T28	NL1-1-T0	26			Eubacterium_rectale	P29-2	P82-2	10
Bacteroides_uniformis	NL1-2-T7	NL1-1-T0	26			Eubacterium_rectale	P5-1	P82-2	10
Bacteroides_uniformis	NL1-1-T0	GE3-2-T30	26			Eubacterium_rectale	P54-1	P7-1	10
Bacteroides_uniformis	GE7-1-T30	NL1-1-T0	25			Eubacterium_rectale	P29-1	P53-1	9
Bacteroides_uniformis	GE7-1-T7	NL1-1-T0	25			Eubacterium_rectale	P29-1	P82-1	9
Bacteroides_uniformis	GE7-1-T0	NL1-1-T0	25			Eubacterium_rectale	P47-2	P53-2	9
Bacteroides_uniformis	NL1-1-T0	GE7-2-T30	25			Eubacterium_rectale	P47-2	P54-2	9
Bacteroides_uniformis	NL1-1-T0	GE7-2-T0	25			Eubacterium_rectale	P29-1	P29-2	9
Bacteroides_uniformis	NL1-1-T0	GE7-2-T7	25			Eubacterium_rectale	P5-2	P97-2	9
Bacteroides_uniformis	GE7-1-T30	NL1-2-T0	22			Eubacterium_rectale	P29-2	P97-2	8
Bacteroides_uniformis	GE7-1-T30	NL1-2-T28	22			Eubacterium_rectale	P53-1	P97-2	8
Bacteroides_uniformis	GE7-1-T30	NL1-2-T7	22			Eubacterium_rectale	P54-2	P97-2	8
Bacteroides_uniformis	GE7-1-T7	NL1-2-T28	22			Eubacterium_rectale	P82-2	P97-2	8
Bacteroides_uniformis	GE7-1-T7	NL1-2-T7	22			Eubacterium_rectale	P29-1	P5-1	8
Bacteroides_uniformis	NL1-1-T0	GE3-2-T7	22			Eubacterium_rectale	P29-1	P82-2	8
Bacteroides_uniformis	NL1-2-T0	GE7-1-T7	22			Eubacterium_rectale	P47-2	P7-1	8
Bacteroides_uniformis	NL1-2-T0	GE7-1-T0	22			Eubacterium_rectale	P5-2	P53-2	8
Bacteroides_uniformis	NL1-2-T0	GE7-2-T30	22			Eubacterium_rectale	P53-1	P53-2	7
Bacteroides_uniformis	NL1-2-T0	GE7-2-T0	22			Eubacterium_rectale	P54-2	P82-1	7
Bacteroides_uniformis	NL1-2-T0	GE7-2-T7	22			Eubacterium_rectale	P5-1	P97-2	7
Bacteroides_uniformis	NL1-2-T28	GE7-1-T0	22			Eubacterium_rectale	P53-2	P7-1	7
Bacteroides_uniformis	NL1-2-T7	GE7-1-T0	22			Eubacterium_rectale	P5-2	P7-1	7
Bacteroides_uniformis	NL1-2-T7	GE7-2-T30	22			Eubacterium_rectale	P53-1	P54-2	6
Bacteroides_uniformis	NL1-2-T7	GE7-2-T0	22			Eubacterium_rectale	P29-1	P54-2	6
Bacteroides_uniformis	NL1-2-T7	GE7-2-T7	22			Eubacterium_rectale	P54-2	P82-2	6
Bacteroides_uniformis	NL1-2-T28	GE7-2-T30	22			Eubacterium_rectale	P7-1	P97-2	6
Bacteroides_uniformis	NL1-2-T28	GE7-2-T0	22			Eubacterium_rectale	P53-2	P82-1	5
Bacteroides_uniformis	NL1-2-T28	GE7-2-T7	22			Eubacterium_rectale	P29-2	P53-2	5
Bacteroides_uniformis	NL1-2-T0	GE3-2-T30	20			Eubacterium_rectale	P53-2	P97-2	5
Bacteroides_uniformis	NL1-2-T0	NL1-1-T7	20			Eubacterium_rectale	P29-2	P54-2	5
Bacteroides_uniformis	NL1-1-T0	GE4-2-T7	20			Eubacterium_rectale	P53-2	P82-2	5
Bacteroides_uniformis	GE4-2-T30	GE3-2-T30	19			Eubacterium_rectale	P5-1	P53-2	5
Bacteroides_uniformis	NL1-2-T0	GE3-2-T0	19			Eubacterium_rectale	P5-1	P54-2	5
Bacteroides_uniformis	NL1-2-T0	GE3-1-T7	19			Eubacterium_rectale	P7-1	P82-1	5
Bacteroides_uniformis	NL1-2-T0	GE3-1-T0	19			Eubacterium_rectale	P5-2	P82-1	5
Bacteroides_uniformis	NL1-2-T0	GE3-1-T30	19			Eubacterium_rectale	P29-2	P5-2	5
Bacteroides_uniformis	GE4-1-T30	GE3-2-T30	19			Eubacterium_rectale	P29-1	P53-2	4
Bacteroides_uniformis	GE4-2-T7	GE3-2-T30	19			Eubacterium_rectale	P53-1	P7-1	4
Bacteroides_uniformis	GE4-2-T0	GE3-2-T30	19			Eubacterium_rectale	P29-2	P7-1	4
Bacteroides_uniformis	GE7-1-T30	GE3-2-T30	19			Eubacterium_rectale	P7-1	P82-2	4
Bacteroides_uniformis	GE7-2-T30	GE3-2-T30	19			Eubacterium_rectale	P5-1	P7-1	4
Bacteroides_uniformis	GE7-2-T0	GE3-2-T30	19			Eubacterium_rectale	P29-1	P7-1	4
Bacteroides_uniformis	GE7-2-T7	GE3-2-T30	19			Eubacterium_rectale	P29-1	P5-2	4
Bacteroides_uniformis	NL1-1-T0	GE4-2-T0	19			Eubacterium_rectale	P5-2	P82-2	4
Bacteroides_uniformis	NL1-1-T0	GE4-2-T30	19			Eubacterium_rectale	P5-1	P5-2	4
Bacteroides_uniformis	NL1-1-T0	GE4-1-T30	19			Eubacterium_rectale	P53-2	P54-2	3
Bacteroides_uniformis	NL1-2-T28	NL1-1-T7	19			Eubacterium_rectale	P54-2	P7-1	3
Bacteroides_uniformis	NL1-2-T7	NL1-1-T7	19			Eubacterium_rectale	P5-2	P53-1	3
Bacteroides_uniformis	GE7-1-T30	GE3-2-T0	18			Eubacterium_rectale	P5-2	P54-2	2
Bacteroides_uniformis	GE7-1-T30	GE3-1-T0	18			Eubacterium_siraeum	P29-1	P97-2	11
Bacteroides_uniformis	GE7-1-T7	GE3-2-T0	18			Eubacterium_siraeum	P5-2	P97-2	2
Bacteroides_uniformis	GE7-1-T7	GE3-1-T7	18			Eubacterium_siraeum	P53-2	P97-2	1
Bacteroides_uniformis	GE7-1-T7	GE3-1-T0	18			Eubacterium_siraeum	P29-1	P29-2	2
Bacteroides_uniformis	NL1-2-T28	GE3-2-T0	18			Eubacterium_siraeum	P29-1	P53-2	1
Bacteroides_uniformis	NL1-2-T28	GE3-1-T7	18			Eubacterium_siraeum	P29-2	P97-2	2
Bacteroides_uniformis	GE7-1-T30	NL1-1-T7	18			Eubacterium_siraeum	P29-1	P5-2	2
Bacteroides_uniformis	GE7-2-T30	NL1-1-T7	18			Eubacterium_siraeum	P29-2	P5-2	9
Bacteroides_uniformis	NL1-2-T28	GE3-1-T0	18			Eubacterium_siraeum	P29-2	P53-2	2
Bacteroides_uniformis	NL1-2-T28	GE3-1-T30	18			Eubacterium_siraeum	P5-2	P53-2	2
Bacteroides_uniformis	NL1-2-T7	GE3-2-T0	18			Eubacterium_siraeum	P53-2	P54-2	10
Bacteroides_uniformis	NL1-2-T7	GE3-1-T7	18			Eubacterium_siraeum	P29-1	P54-2	4
Bacteroides_uniformis	GE7-1-T7	NL1-1-T7	18			Eubacterium_siraeum	P29-2	P54-2	20
Bacteroides_uniformis	NL1-2-T7	GE3-1-T0	18			Eubacterium_siraeum	P54-2	P97-2	1
Bacteroides_uniformis	NL1-2-T7	GE3-1-T30	18			Eubacterium_siraeum	P5-2	P54-2	24
Bacteroides_uniformis	GE7-1-T0	NL1-1-T7	18			Eubacterium_siraeum	P29-2	P97-1	10
Bacteroides_uniformis	GE7-1-T0	GE3-2-T0	18			Eubacterium_siraeum	P53-2	P97-1	10
Bacteroides_uniformis	GE7-1-T0	GE3-1-T7	18			Eubacterium_siraeum	P29-1	P97-1	13
Bacteroides_uniformis	GE7-1-T0	GE3-1-T0	18			Eubacterium_siraeum	P5-2	P97-1	8
Bacteroides_uniformis	GE7-1-T30	GE3-1-T30	18			Eubacterium_siraeum	P97-1	P97-2	3
Bacteroides_uniformis	GE7-1-T7	GE3-1-T30	18			Faecalibacterium_prausnitzii_A2	P82-1	P82-2	46
Bacteroides_uniformis	GE7-1-T0	GE3-1-T30	18			Faecalibacterium_prausnitzii_A2	P5-2	P82-1	35
Bacteroides_uniformis	GE7-2-T0	NL1-1-T7	18			Faecalibacterium_prausnitzii_A2	P54-1	P82-1	33
Bacteroides_uniformis	GE7-2-T7	NL1-1-T7	18			Faecalibacterium_prausnitzii_A2	P5-1	P53-2	32
Bacteroides_uniformis	GE7-1-T7	GE3-2-T30	18			Faecalibacterium_prausnitzii_A2	P5-1	P82-1	32
Bacteroides_uniformis	NL1-2-T28	GE3-2-T30	18			Faecalibacterium_prausnitzii_A2	P5-2	P53-2	32
Bacteroides_uniformis	NL1-2-T7	GE3-2-T30	18			Faecalibacterium_prausnitzii_A2	P5-1	P54-1	32
Bacteroides_uniformis	GE7-1-T0	GE3-2-T30	18			Faecalibacterium_prausnitzii_A2	P54-2	P82-1	32
Bacteroides_uniformis	NL1-1-T7	GE3-2-T30	18			Faecalibacterium_prausnitzii_A2	P53-2	P54-1	31
Bacteroides_uniformis	GE3-1-T0	GE7-2-T30	18			Faecalibacterium_prausnitzii_A2	P5-1	P82-2	29
Bacteroides_uniformis	GE3-1-T0	GE7-2-T0	18			Faecalibacterium_prausnitzii_A2	P5-2	P82-2	29
Bacteroides_uniformis	GE3-1-T0	GE7-2-T7	18			Faecalibacterium_prausnitzii_A2	P54-1	P82-2	28
Bacteroides_uniformis	GE3-1-T30	GE7-2-T30	18			Faecalibacterium_prausnitzii_A2	P53-2	P54-2	28
Bacteroides_uniformis	GE3-1-T30	GE7-2-T0	18			Faecalibacterium_prausnitzii_A2	P54-2	P82-2	28
Bacteroides_uniformis	GE3-1-T30	GE7-2-T7	18			Faecalibacterium_prausnitzii_A2	P29-1	P47-1	27
Bacteroides_uniformis	GE3-2-T0	GE7-2-T30	18			Faecalibacterium_prausnitzii_A2	P29-1	P5-1	26
Bacteroides_uniformis	GE3-2-T0	GE7-2-T0	18			Faecalibacterium_prausnitzii_A2	P29-1	P5-2	26
Bacteroides_uniformis	GE3-2-T0	GE7-2-T7	18			Faecalibacterium_prausnitzii_A2	P29-1	P54-2	26
Bacteroides_uniformis	GE3-1-T7	GE7-2-T30	18			Faecalibacterium_prausnitzii_A2	P29-1	P54-1	24
Bacteroides_uniformis	GE3-1-T7	GE7-2-T0	18			Faecalibacterium_prausnitzii_A2	P53-2	P82-1	23
Bacteroides_uniformis	GE3-1-T7	GE7-2-T7	18			Faecalibacterium_prausnitzii_A2	P29-1	P82-2	22
Bacteroides_uniformis	NL1-2-T0	GE3-2-T7	17			Faecalibacterium_prausnitzii_A2	P29-1	P53-2	21
Bacteroides_uniformis	GE7-1-T30	GE3-1-T7	17			Faecalibacterium_prausnitzii_A2	P53-2	P82-2	21
Bacteroides_uniformis	GE3-1-T0	GE3-2-T30	17			Faecalibacterium_prausnitzii_A2	P47-1	P5-2	19
Bacteroides_uniformis	GE3-1-T30	GE3-2-T30	17			Faecalibacterium_prausnitzii_A2	P47-1	P54-2	19
Bacteroides_uniformis	GE3-2-T0	GE3-2-T30	17			Faecalibacterium_prausnitzii_A2	P29-1	P82-1	18
Bacteroides_uniformis	GE3-1-T7	GE3-2-T30	17			Faecalibacterium_prausnitzii_A2	P54-2	P97-1	18
Bacteroides_uniformis	GE4-2-T30	GE3-2-T7	15			Faecalibacterium_prausnitzii_A2	P5-2	P97-2	18
Bacteroides_uniformis	GE4-1-T30	GE3-2-T7	15			Faecalibacterium_prausnitzii_A2	P54-2	P97-2	18
Bacteroides_uniformis	GE4-2-T7	GE3-2-T7	15			Faecalibacterium_prausnitzii_A2	P29-2	P53-1	17
Bacteroides_uniformis	GE4-2-T0	GE3-2-T7	15			Faecalibacterium_prausnitzii_A2	P29-2	P5-2	17
Bacteroides_uniformis	GE7-1-T30	GE3-2-T7	14			Faecalibacterium_prausnitzii_A2	P5-2	P97-1	17
Bacteroides_uniformis	GE7-1-T7	GE3-2-T7	14			Faecalibacterium_prausnitzii_A2	P29-2	P54-2	16
Bacteroides_uniformis	GE7-1-T0	GE3-2-T7	14			Faecalibacterium_prausnitzii_A2	P29-2	P54-1	14
Bacteroides_uniformis	GE7-2-T30	GE3-2-T7	14			Faecalibacterium_prausnitzii_A2	P5-1	P97-2	14
Bacteroides_uniformis	GE7-2-T0	GE3-2-T7	14			Faecalibacterium_prausnitzii_A2	P47-1	P54-1	14
Bacteroides_uniformis	GE7-2-T7	GE3-2-T7	14			Faecalibacterium_prausnitzii_A2	P53-1	P54-2	14
Bacteroides_uniformis	NL1-2-T28	GE3-2-T7	14			Faecalibacterium_prausnitzii_A2	P54-1	P97-1	13
Bacteroides_uniformis	NL1-2-T7	GE3-2-T7	14			Faecalibacterium_prausnitzii_A2	P54-1	P97-2	13
Bacteroides_uniformis	NL1-2-T0	GE4-2-T0	14			Faecalibacterium_prausnitzii_A2	P5-2	P53-1	13
Bacteroides_uniformis	NL1-2-T0	GE4-2-T30	14			Faecalibacterium_prausnitzii_A2	P5-1	P97-1	12
Bacteroides_uniformis	NL1-2-T0	GE4-1-T30	14			Faecalibacterium_prausnitzii_A2	P53-1	P54-1	12
Bacteroides_uniformis	NL1-2-T0	GE4-2-T7	14			Faecalibacterium_prausnitzii_A2	P47-1	P5-1	12
Bacteroides_uniformis	NL1-1-T7	GE3-2-T7	13			Faecalibacterium_prausnitzii_A2	P47-2	P54-2	12
Bacteroides_uniformis	NL1-2-T7	GE4-2-T0	13			Faecalibacterium_prausnitzii_A2	P47-1	P53-2	11
Bacteroides_uniformis	NL1-2-T7	GE4-2-T30	13			Faecalibacterium_prausnitzii_A2	P47-2	P5-2	11
Bacteroides_uniformis	NL1-2-T7	GE4-1-T30	13			Faecalibacterium_prausnitzii_A2	P5-1	P53-1	10
Bacteroides_uniformis	NL1-2-T7	GE4-2-T7	13			Faecalibacterium_prausnitzii_A2	P29-2	P5-1	10
Bacteroides_uniformis	GE4-2-T0	GE3-1-T7	12			Faecalibacterium_prausnitzii_A2	P5-2	P7-1	10
Bacteroides_uniformis	GE3-1-T7	GE4-2-T30	12			Faecalibacterium_prausnitzii_A2	P54-2	P7-1	10
Bacteroides_uniformis	GE3-1-T7	GE4-2-T7	12			Faecalibacterium_prausnitzii_A2	P29-1	P53-1	9
Bacteroides_uniformis	GE7-1-T30	GE4-2-T0	12			Faecalibacterium_prausnitzii_A2	P53-2	P97-2	9
Bacteroides_uniformis	GE7-1-T30	GE4-2-T30	12			Faecalibacterium_prausnitzii_A2	P82-2	P97-2	9
Bacteroides_uniformis	GE7-1-T30	GE4-1-T30	12			Faecalibacterium_prausnitzii_A2	P47-1	P82-2	9
Bacteroides_uniformis	GE7-1-T30	GE4-2-T7	12			Faecalibacterium_prausnitzii_A2	P29-2	P53-2	8
Bacteroides_uniformis	GE7-2-T30	GE4-2-T7	12			Faecalibacterium_prausnitzii_A2	P53-2	P97-1	8
Bacteroides_uniformis	GE7-1-T7	GE4-2-T0	12			Faecalibacterium_prausnitzii_A2	P47-1	P82-1	8
Bacteroides_uniformis	GE7-1-T7	GE4-2-T30	12			Faecalibacterium_prausnitzii_A2	P82-1	P97-2	8
Bacteroides_uniformis	GE7-1-T7	GE4-1-T30	12			Faecalibacterium_prausnitzii_A2	P82-2	P97-1	8
Bacteroides_uniformis	GE7-1-T7	GE4-2-T7	12			Faecalibacterium_prausnitzii_A2	P53-1	P53-2	7
Bacteroides_uniformis	NL1-2-T28	GE4-2-T0	12			Faecalibacterium_prausnitzii_A2	P29-1	P29-2	7
Bacteroides_uniformis	NL1-2-T28	GE4-2-T30	12			Faecalibacterium_prausnitzii_A2	P47-1	P53-1	7
Bacteroides_uniformis	NL1-2-T28	GE4-1-T30	12			Faecalibacterium_prausnitzii_A2	P29-1	P97-1	7
Bacteroides_uniformis	NL1-2-T28	GE4-2-T7	12			Faecalibacterium_prausnitzii_A2	P29-2	P82-2	7
Bacteroides_uniformis	GE7-1-T0	GE4-2-T0	12			Faecalibacterium_prausnitzii_A2	P29-1	P97-2	7
Bacteroides_uniformis	GE7-1-T0	GE4-2-T30	12			Faecalibacterium_prausnitzii_A2	P54-1	P7-1	7
Bacteroides_uniformis	GE7-1-T0	GE4-1-T30	12			Faecalibacterium_prausnitzii_A2	P47-2	P54-1	7
Bacteroides_uniformis	GE3-1-T0	GE3-2-T7	12			Faecalibacterium_prausnitzii_A2	P29-2	P82-1	6
Bacteroides_uniformis	GE3-1-T30	GE3-2-T7	12			Faecalibacterium_prausnitzii_A2	P53-1	P82-2	6
Bacteroides_uniformis	GE7-1-T0	GE4-2-T7	12			Faecalibacterium_prausnitzii_A2	P82-1	P97-1	6
Bacteroides_uniformis	GE3-2-T0	GE3-2-T7	12			Faecalibacterium_prausnitzii_A2	P47-1	P97-1	6
Bacteroides_uniformis	GE3-1-T7	GE3-2-T7	12			Faecalibacterium_prausnitzii_A2	P5-1	P7-1	6
Bacteroides_uniformis	GE4-2-T30	NL1-1-T7	12			Faecalibacterium_prausnitzii_A2	P53-1	P82-1	5
Bacteroides_uniformis	GE4-1-T30	NL1-1-T7	12			Faecalibacterium_prausnitzii_A2	P29-2	P47-1	5
Bacteroides_uniformis	GE4-2-T7	NL1-1-T7	12			Faecalibacterium_prausnitzii_A2	P47-1	P97-2	5
Bacteroides_uniformis	GE4-2-T0	NL1-1-T7	12			Faecalibacterium_prausnitzii_A2	P47-2	P5-1	5
Bacteroides_uniformis	GE4-2-T30	GE7-2-T30	12			Faecalibacterium_prausnitzii_A2	P53-2	P7-1	4
Bacteroides_uniformis	GE4-2-T30	GE7-2-T0	12			Faecalibacterium_prausnitzii_A2	P47-2	P53-2	4
Bacteroides_uniformis	GE4-2-T30	GE7-2-T7	12			Faecalibacterium_prausnitzii_A2	P53-1	P97-1	4
Bacteroides_uniformis	GE4-1-T30	GE7-2-T30	12			Faecalibacterium_prausnitzii_A2	P53-1	P97-2	4
Bacteroides_uniformis	GE4-1-T30	GE7-2-T0	12			Faecalibacterium_prausnitzii_A2	P29-2	P97-1	4
Bacteroides_uniformis	GE4-1-T30	GE7-2-T7	12			Faecalibacterium_prausnitzii_A2	P29-2	P97-2	4
Bacteroides_uniformis	GE4-2-T7	GE7-2-T0	12			Faecalibacterium_prausnitzii_A2	P47-1	P47-2	4
Bacteroides_uniformis	GE4-2-T7	GE7-2-T7	12			Faecalibacterium_prausnitzii_A2	P47-2	P82-1	4
Bacteroides_uniformis	GE4-2-T0	GE7-2-T30	12			Faecalibacterium_prausnitzii_A2	P97-1	P97-2	4
Bacteroides_uniformis	GE4-2-T0	GE7-2-T0	12			Faecalibacterium_prausnitzii_A2	P47-2	P82-2	4
Bacteroides_uniformis	GE4-2-T0	GE7-2-T7	12			Faecalibacterium_prausnitzii_A2	P29-1	P7-1	3
Bacteroides_uniformis	GE4-2-T0	GE3-1-T0	11			Faecalibacterium_prausnitzii_A2	P7-1	P82-1	3
Bacteroides_uniformis	GE4-2-T30	GE3-1-T30	11			Faecalibacterium_prausnitzii_A2	P29-2	P7-1	3
Bacteroides_uniformis	GE4-2-T0	GE3-1-T30	11			Faecalibacterium_prausnitzii_A2	P47-2	P53-1	3
Bacteroides_uniformis	GE3-2-T0	GE4-2-T0	11			Faecalibacterium_prausnitzii_A2	P53-1	P7-1	3
Bacteroides_uniformis	GE3-2-T0	GE4-2-T30	11			Faecalibacterium_prausnitzii_A2	P29-1	P47-2	3
Bacteroides_uniformis	GE3-1-T0	GE4-2-T30	11			Faecalibacterium_prausnitzii_A2	P47-1	P7-1	3
Bacteroides_uniformis	GE3-1-T0	GE4-1-T30	11			Faecalibacterium_prausnitzii_A2	P7-1	P97-1	3
Bacteroides_uniformis	GE3-1-T0	GE4-2-T7	11			Faecalibacterium_prausnitzii_A2	P29-2	P47-2	3
Bacteroides_uniformis	GE3-1-T30	GE4-1-T30	11			Faecalibacterium_prausnitzii_A2	P47-2	P7-1	3
Bacteroides_uniformis	GE3-1-T30	GE4-2-T7	11			Faecalibacterium_prausnitzii_A2	P7-1	P82-2	3
Bacteroides_uniformis	GE3-2-T0	GE4-1-T30	11			Faecalibacterium_prausnitzii_A2	P7-1	P97-2	3
Bacteroides_uniformis	GE3-2-T0	GE4-2-T7	11			Faecalibacterium_prausnitzii_A2	P47-2	P97-1	3
Bacteroides_uniformis	GE3-1-T7	GE4-1-T30	11			Faecalibacterium_prausnitzii_A2	P47-2	P97-2	3
Bacteroides_vulgatus	GE7-1-T0	GE7-2-T7	100			Faecalibacterium_prausnitzii_L2	P53-2	P82-1	40
Bacteroides_vulgatus	GE7-1-T0	GE7-1-T30	100			Faecalibacterium_prausnitzii_L2	P53-1	P82-1	38
Bacteroides_vulgatus	GE7-1-T0	GE7-2-T0	100			Faecalibacterium_prausnitzii_L2	P53-1	P82-2	36
Bacteroides_vulgatus	GE7-1-T0	GE7-1-T7	100			Faecalibacterium_prausnitzii_L2	P29-1	P82-2	34
Bacteroides_vulgatus	GE3-1-T7	GE3-1-T30	100			Faecalibacterium_prausnitzii_L2	P82-1	P82-2	27
Bacteroides_vulgatus	NL1-2-T7	NL1-2-T28	100			Faecalibacterium_prausnitzii_L2	P53-1	P53-2	27
Bacteroides_vulgatus	NL1-2-T7	NL1-2-T0	100			Faecalibacterium_prausnitzii_L2	P29-1	P53-2	25
Bacteroides_vulgatus	GE7-2-T7	GE7-1-T30	100			Faecalibacterium_prausnitzii_L2	P29-1	P53-1	24
Bacteroides_vulgatus	GE7-2-T7	GE7-2-T0	100			Faecalibacterium_prausnitzii_L2	P29-1	P47-2	22
Bacteroides_vulgatus	GE7-2-T7	GE7-1-T7	100			Faecalibacterium_prausnitzii_L2	P29-1	P82-1	22
Bacteroides_vulgatus	GE7-2-T7	GE7-2-T30	100			Faecalibacterium_prausnitzii_L2	P53-1	P97-2	21
Bacteroides_vulgatus	GE7-1-T30	GE7-2-T0	100			Faecalibacterium_prausnitzii_L2	P47-2	P53-2	20
Bacteroides_vulgatus	GE7-1-T30	GE7-1-T7	100			Faecalibacterium_prausnitzii_L2	P29-2	P53-1	19
Bacteroides_vulgatus	GE7-2-T0	GE7-1-T7	100			Faecalibacterium_prausnitzii_L2	P53-1	P54-2	18
Bacteroides_vulgatus	GE3-1-T0	GE3-2-T0	100			Faecalibacterium_prausnitzii_L2	P53-2	P82-2	18
Bacteroides_vulgatus	GE3-1-T0	GE3-1-T7	100			Faecalibacterium_prausnitzii_L2	P29-1	P29-2	16
Bacteroides_vulgatus	GE3-1-T0	GE3-1-T30	100			Faecalibacterium_prausnitzii_L2	P82-1	P97-2	15
Bacteroides_vulgatus	GE3-2-T0	GE3-1-T7	100			Faecalibacterium_prausnitzii_L2	P29-2	P82-1	14
Bacteroides_vulgatus	GE3-2-T0	GE3-1-T30	100			Faecalibacterium_prausnitzii_L2	P29-2	P82-2	14
Bacteroides_vulgatus	GE4-2-T30	GE4-1-T30	100			Faecalibacterium_prausnitzii_L2	P29-1	P97-2	14
Bacteroides_vulgatus	GE7-2-T0	GE7-2-T30	100			Faecalibacterium_prausnitzii_L2	P29-2	P97-2	13
Bacteroides_vulgatus	GE4-2-T0	GE4-2-T7	100			Faecalibacterium_prausnitzii_L2	P54-2	P82-1	13
Bacteroides_vulgatus	GE4-2-T0	GE4-2-T30	100			Faecalibacterium_prausnitzii_L2	P82-2	P97-2	13
Bacteroides_vulgatus	GE4-2-T0	GE4-1-T30	100			Faecalibacterium_prausnitzii_L2	P47-2	P53-1	13
Bacteroides_vulgatus	GE4-2-T7	GE4-2-T30	100			Faecalibacterium_prausnitzii_L2	P47-1	P7-1	13
Bacteroides_vulgatus	GE4-2-T7	GE4-1-T30	100			Faecalibacterium_prausnitzii_L2	P47-1	P53-2	12
Bacteroides_vulgatus	GE4-2-T30	GE4-1-T7	100			Faecalibacterium_prausnitzii_L2	P53-2	P97-1	12
Bacteroides_vulgatus	GE4-1-T30	GE4-1-T7	100			Faecalibacterium_prausnitzii_L2	P53-2	P97-2	12
Bacteroides_vulgatus	GE3-2-T7	GE3-2-T30	100			Faecalibacterium_prausnitzii_L2	P29-2	P7-1	12
Bacteroides_vulgatus	GE4-2-T0	GE4-1-T7	100			Faecalibacterium_prausnitzii_L2	P53-2	P54-2	11
Bacteroides_vulgatus	GE4-2-T7	GE4-1-T7	100			Faecalibacterium_prausnitzii_L2	P47-2	P82-2	11
Bacteroides_vulgatus	NL1-1-T7	NL1-1-T28	100			Faecalibacterium_prausnitzii_L2	P54-2	P82-2	11
Bacteroides_vulgatus	NL1-1-T7	NL1-1-T0	100			Faecalibacterium_prausnitzii_L2	P53-1	P97-1	11
Bacteroides_vulgatus	NL1-1-T28	NL1-1-T0	100			Faecalibacterium_prausnitzii_L2	P29-1	P54-2	11
Bacteroides_vulgatus	NL1-2-T28	NL1-2-T0	99			Faecalibacterium_prausnitzii_L2	P29-2	P53-2	10
Bacteroides_vulgatus	GE7-1-T0	GE7-2-T30	99			Faecalibacterium_prausnitzii_L2	P47-2	P82-1	10
Bacteroides_vulgatus	GE7-1-T30	GE7-2-T30	99			Faecalibacterium_prausnitzii_L2	P47-1	P47-2	9
Bacteroides_vulgatus	GE7-1-T7	GE7-2-T30	99			Faecalibacterium_prausnitzii_L2	P29-1	P97-1	9
Bacteroides_vulgatus	NL1-2-T7	NL1-1-T7	98			Faecalibacterium_prausnitzii_L2	P29-2	P54-2	8
Bacteroides_vulgatus	NL1-2-T7	NL1-1-T28	98			Faecalibacterium_prausnitzii_L2	P47-1	P82-1	8
Bacteroides_vulgatus	NL1-2-T28	NL1-1-T28	98			Faecalibacterium_prausnitzii_L2	P97-1	P97-2	8
Bacteroides_vulgatus	NL1-2-T0	NL1-1-T28	98			Faecalibacterium_prausnitzii_L2	P47-1	P53-1	8
Bacteroides_vulgatus	NL1-2-T7	NL1-1-T0	98			Faecalibacterium_prausnitzii_L2	P54-2	P97-2	8
Bacteroides_vulgatus	NL1-2-T28	NL1-1-T0	98			Faecalibacterium_prausnitzii_L2	P29-2	P47-2	7
Bacteroides_vulgatus	NL1-2-T0	NL1-1-T0	98			Faecalibacterium_prausnitzii_L2	P29-2	P97-1	7
Bacteroides_vulgatus	NL1-2-T28	NL1-1-T7	97			Faecalibacterium_prausnitzii_L2	P82-1	P97-1	7
Bacteroides_vulgatus	NL1-2-T0	NL1-1-T7	97			Faecalibacterium_prausnitzii_L2	P47-2	P97-1	7
Bacteroides_vulgatus	GE3-1-T0	GE3-2-T30	91			Faecalibacterium_prausnitzii_L2	P82-2	P97-1	7
Bacteroides_vulgatus	GE3-1-T7	GE3-2-T30	90			Faecalibacterium_prausnitzii_L2	P29-1	P47-1	7
Bacteroides_vulgatus	GE3-1-T30	GE3-2-T30	90			Faecalibacterium_prausnitzii_L2	P29-2	P47-1	6
Bacteroides_vulgatus	GE3-2-T7	GE3-1-T0	89			Faecalibacterium_prausnitzii_L2	P47-1	P97-1	6
Bacteroides_vulgatus	GE3-2-T7	GE3-1-T30	89			Faecalibacterium_prausnitzii_L2	P47-1	P97-2	6
Bacteroides_vulgatus	GE3-2-T7	GE3-1-T7	88			Faecalibacterium_prausnitzii_L2	P54-2	P97-1	6
Bacteroides_vulgatus	GE3-2-T0	GE3-2-T30	84			Faecalibacterium_prausnitzii_L2	P47-2	P97-2	6
Bacteroides_vulgatus	GE3-2-T7	GE3-2-T0	82			Faecalibacterium_prausnitzii_L2	P47-1	P54-2	5
Bacteroides_vulgatus	GE3-1-T7	NL1-2-T0	66			Faecalibacterium_prausnitzii_L2	P47-2	P54-2	5
Bacteroides_vulgatus	GE3-1-T30	NL1-2-T0	66			Faecalibacterium_prausnitzii_L2	P47-1	P82-2	5
Bacteroides_vulgatus	GE3-1-T0	NL1-2-T0	66			Faecalibacterium_prausnitzii_SL3	P29-2	P82-2	44
Bacteroides_vulgatus	GE7-1-T0	GE3-1-T0	66			Faecalibacterium_prausnitzii_SL3	P29-1	P97-2	43
Bacteroides_vulgatus	GE7-1-T0	GE3-1-T7	66			Faecalibacterium_prausnitzii_SL3	P29-1	P29-2	39
Bacteroides_vulgatus	GE7-1-T0	GE3-1-T30	66			Faecalibacterium_prausnitzii_SL3	P29-2	P97-2	35
Bacteroides_vulgatus	GE7-2-T30	GE3-1-T30	66			Faecalibacterium_prausnitzii_SL3	P29-1	P97-1	33
Bacteroides_vulgatus	GE7-1-T7	GE3-1-T7	66			Faecalibacterium_prausnitzii_SL3	P29-1	P82-2	30
Bacteroides_vulgatus	GE7-1-T7	GE3-1-T30	66			Faecalibacterium_prausnitzii_SL3	P97-1	P97-2	29
Bacteroides_vulgatus	GE3-1-T7	GE7-2-T30	66			Faecalibacterium_prausnitzii_SL3	P82-1	P82-2	26
Bacteroides_vulgatus	GE3-1-T0	GE7-2-T30	66			Faecalibacterium_prausnitzii_SL3	P7-1	P97-2	25
Bacteroides_vulgatus	GE3-1-T7	NL1-2-T7	65			Faecalibacterium_prausnitzii_SL3	P54-1	P97-1	23
Bacteroides_vulgatus	GE3-1-T0	NL1-2-T7	65			Faecalibacterium_prausnitzii_SL3	P29-2	P7-1	23
Bacteroides_vulgatus	GE3-2-T0	NL1-2-T0	65			Faecalibacterium_prausnitzii_SL3	P29-1	P7-1	23
Bacteroides_vulgatus	NL1-2-T7	GE3-1-T30	65			Faecalibacterium_prausnitzii_SL3	P29-2	P97-1	22
Bacteroides_vulgatus	GE3-1-T0	GE7-1-T7	65			Faecalibacterium_prausnitzii_SL3	P7-1	P97-1	22
Bacteroides_vulgatus	GE3-1-T7	NL1-2-T28	64			Faecalibacterium_prausnitzii_SL3	P53-2	P97-2	20
Bacteroides_vulgatus	GE3-1-T30	NL1-2-T28	64			Faecalibacterium_prausnitzii_SL3	P53-2	P82-2	20
Bacteroides_vulgatus	GE3-1-T0	NL1-2-T28	64			Faecalibacterium_prausnitzii_SL3	P5-2	P82-2	20
Bacteroides_vulgatus	GE3-2-T0	NL1-2-T7	64			Faecalibacterium_prausnitzii_SL3	P82-2	P97-1	19
Bacteroides_vulgatus	GE7-1-T0	GE3-2-T0	64			Faecalibacterium_prausnitzii_SL3	P53-1	P82-2	18
Bacteroides_vulgatus	GE7-1-T7	GE3-2-T0	64			Faecalibacterium_prausnitzii_SL3	P54-1	P54-2	16
Bacteroides_vulgatus	GE3-2-T0	GE7-2-T30	64			Faecalibacterium_prausnitzii_SL3	P54-1	P82-2	16
Bacteroides_vulgatus	GE3-2-T0	NL1-2-T28	63			Faecalibacterium_prausnitzii_SL3	P54-2	P82-2	15
Bacteroides_vulgatus	GE3-1-T7	GE4-2-T30	60			Faecalibacterium_prausnitzii_SL3	P29-2	P53-1	14
Bacteroides_vulgatus	GE3-1-T7	GE4-1-T30	60			Faecalibacterium_prausnitzii_SL3	P54-2	P97-1	13
Bacteroides_vulgatus	GE3-1-T30	GE4-1-T30	60			Faecalibacterium_prausnitzii_SL3	P29-2	P54-1	13
Bacteroides_vulgatus	GE3-1-T0	GE4-2-T30	60			Faecalibacterium_prausnitzii_SL3	P53-1	P7-1	13
Bacteroides_vulgatus	GE3-1-T0	GE4-1-T30	60			Faecalibacterium_prausnitzii_SL3	P29-1	P53-2	13
Bacteroides_vulgatus	GE3-1-T0	GE4-1-T7	60			Faecalibacterium_prausnitzii_SL3	P54-1	P7-1	13
Bacteroides_vulgatus	GE3-1-T7	GE4-1-T7	60			Faecalibacterium_prausnitzii_SL3	P54-2	P7-1	12
Bacteroides_vulgatus	GE3-1-T30	GE4-1-T7	60			Faecalibacterium_prausnitzii_SL3	P5-2	P97-2	12
Bacteroides_vulgatus	GE4-2-T30	GE3-1-T30	60			Faecalibacterium_prausnitzii_SL3	P29-2	P54-2	11
Bacteroides_vulgatus	GE4-2-T7	GE3-1-T7	60			Faecalibacterium_prausnitzii_SL3	P29-1	P82-1	11
Bacteroides_vulgatus	GE4-2-T7	GE3-1-T30	60			Faecalibacterium_prausnitzii_SL3	P5-1	P82-2	11
Bacteroides_vulgatus	GE3-1-T7	NL1-1-T0	59			Faecalibacterium_prausnitzii_SL3	P82-1	P97-2	10
Bacteroides_vulgatus	GE3-1-T30	NL1-1-T0	59			Faecalibacterium_prausnitzii_SL3	P29-2	P5-2	10
Bacteroides_vulgatus	GE3-1-T0	NL1-1-T0	59			Faecalibacterium_prausnitzii_SL3	P29-1	P53-1	10
Bacteroides_vulgatus	GE4-2-T0	GE3-1-T0	59			Faecalibacterium_prausnitzii_SL3	P29-2	P82-1	9
Bacteroides_vulgatus	GE4-2-T7	GE3-1-T0	59			Faecalibacterium_prausnitzii_SL3	P53-1	P97-1	9
Bacteroides_vulgatus	GE4-2-T0	GE3-1-T7	59			Faecalibacterium_prausnitzii_SL3	P53-2	P7-1	9
Bacteroides_vulgatus	GE4-2-T0	GE3-1-T30	59			Faecalibacterium_prausnitzii_SL3	P47-1	P7-1	9
Bacteroides_vulgatus	GE3-1-T7	NL1-1-T7	58			Faecalibacterium_prausnitzii_SL3	P5-2	P7-1	9
Bacteroides_vulgatus	GE3-1-T30	NL1-1-T7	58			Faecalibacterium_prausnitzii_SL3	P47-1	P82-2	9
Bacteroides_vulgatus	GE3-1-T0	NL1-1-T7	58			Faecalibacterium_prausnitzii_SL3	P29-1	P5-2	9
Bacteroides_vulgatus	GE3-2-T0	NL1-1-T0	58			Faecalibacterium_prausnitzii_SL3	P29-2	P53-2	8
Bacteroides_vulgatus	GE3-2-T0	GE4-2-T30	58			Faecalibacterium_prausnitzii_SL3	P53-2	P97-1	8
Bacteroides_vulgatus	GE3-2-T0	GE4-1-T30	58			Faecalibacterium_prausnitzii_SL3	P47-1	P97-1	8
Bacteroides_vulgatus	GE3-2-T0	GE4-1-T7	58			Faecalibacterium_prausnitzii_SL3	P53-1	P97-2	8
Bacteroides_vulgatus	GE4-2-T0	GE3-2-T0	58			Faecalibacterium_prausnitzii_SL3	P47-2	P7-1	8
Bacteroides_vulgatus	GE4-2-T7	GE3-2-T0	58			Faecalibacterium_prausnitzii_SL3	P54-2	P97-2	8
Bacteroides_vulgatus	GE3-2-T0	NL1-1-T7	57			Faecalibacterium_prausnitzii_SL3	P7-1	P82-1	8
Bacteroides_vulgatus	GE3-1-T7	NL1-1-T28	57			Faecalibacterium_prausnitzii_SL3	P5-1	P97-2	8
Bacteroides_vulgatus	GE3-1-T30	NL1-1-T28	57			Faecalibacterium_prausnitzii_SL3	P54-1	P97-2	8
Bacteroides_vulgatus	GE3-1-T0	NL1-1-T28	57			Faecalibacterium_prausnitzii_SL3	P47-2	P82-2	8
Bacteroides_vulgatus	GE3-2-T0	NL1-1-T28	56			Faecalibacterium_prausnitzii_SL3	P53-1	P54-1	7
Bacteroides_vulgatus	GE7-1-T0	NL1-2-T0	54			Faecalibacterium_prausnitzii_SL3	P5-1	P82-1	7
Bacteroides_vulgatus	GE7-2-T30	NL1-2-T0	54			Faecalibacterium_prausnitzii_SL3	P47-2	P97-1	7
Bacteroides_vulgatus	GE7-1-T7	NL1-2-T0	53			Faecalibacterium_prausnitzii_SL3	P29-2	P47-1	7
Bacteroides_vulgatus	GE7-1-T0	NL1-2-T7	51			Faecalibacterium_prausnitzii_SL3	P5-1	P7-1	7
Bacteroides_vulgatus	GE7-2-T30	NL1-2-T7	51			Faecalibacterium_prausnitzii_SL3	P53-1	P54-2	6
Bacteroides_vulgatus	GE7-1-T7	NL1-2-T7	51			Faecalibacterium_prausnitzii_SL3	P53-2	P82-1	6
Bacteroides_vulgatus	GE7-1-T0	NL1-2-T28	49			Faecalibacterium_prausnitzii_SL3	P47-1	P54-1	6
Bacteroides_vulgatus	GE7-2-T30	NL1-2-T28	49			Faecalibacterium_prausnitzii_SL3	P82-1	P97-1	6
Bacteroides_vulgatus	GE7-1-T7	NL1-2-T28	49			Faecalibacterium_prausnitzii_SL3	P29-2	P47-2	6
Bacteroides_vulgatus	GE7-1-T0	GE3-2-T7	46			Faecalibacterium_prausnitzii_SL3	P5-2	P82-1	6
Bacteroides_vulgatus	GE7-1-T0	GE3-2-T30	46			Faecalibacterium_prausnitzii_SL3	P29-2	P5-1	6
Bacteroides_vulgatus	GE7-1-T7	GE3-2-T30	46			Faecalibacterium_prausnitzii_SL3	P29-1	P5-1	6
Bacteroides_vulgatus	GE7-2-T30	GE3-2-T30	46			Faecalibacterium_prausnitzii_SL3	P29-1	P54-1	6
Bacteroides_vulgatus	GE7-1-T0	GE4-1-T7	46			Faecalibacterium_prausnitzii_SL3	P53-1	P53-2	5
Bacteroides_vulgatus	GE7-1-T7	GE4-1-T7	46			Faecalibacterium_prausnitzii_SL3	P53-2	P54-2	5
Bacteroides_vulgatus	GE3-2-T7	GE7-1-T7	46			Faecalibacterium_prausnitzii_SL3	P53-1	P82-1	5
Bacteroides_vulgatus	GE3-2-T7	GE7-2-T30	46			Faecalibacterium_prausnitzii_SL3	P47-2	P54-1	5
Bacteroides_vulgatus	GE7-1-T0	GE4-2-T0	45			Faecalibacterium_prausnitzii_SL3	P53-2	P54-1	5
Bacteroides_vulgatus	GE7-1-T0	GE4-2-T7	45			Faecalibacterium_prausnitzii_SL3	P5-1	P53-2	5
Bacteroides_vulgatus	GE7-1-T0	GE4-2-T30	45			Faecalibacterium_prausnitzii_SL3	P5-1	P5-2	5
Bacteroides_vulgatus	GE7-1-T0	GE4-1-T30	45			Faecalibacterium_prausnitzii_SL3	P5-1	P97-1	5
Bacteroides_vulgatus	GE7-2-T30	GE4-1-T30	45			Faecalibacterium_prausnitzii_SL3	P47-1	P97-2	5
Bacteroides_vulgatus	GE7-1-T7	GE4-2-T30	45			Faecalibacterium_prausnitzii_SL3	P47-2	P97-2	5
Bacteroides_vulgatus	GE7-1-T7	GE4-1-T30	45			Faecalibacterium_prausnitzii_SL3	P5-2	P97-1	5
Bacteroides_vulgatus	GE7-2-T30	GE4-1-T7	45			Faecalibacterium_prausnitzii_SL3	P29-1	P54-2	5
Bacteroides_vulgatus	GE4-2-T0	GE7-1-T7	45			Faecalibacterium_prausnitzii_SL3	P47-1	P47-2	4
Bacteroides_vulgatus	GE4-2-T30	GE7-2-T30	45			Faecalibacterium_prausnitzii_SL3	P47-1	P53-1	4
Bacteroides_vulgatus	GE4-2-T0	GE7-2-T30	45			Faecalibacterium_prausnitzii_SL3	P47-1	P53-2	4
Bacteroides_vulgatus	GE4-2-T7	GE7-1-T7	45			Faecalibacterium_prausnitzii_SL3	P47-1	P54-2	4
Bacteroides_vulgatus	GE4-2-T7	GE7-2-T30	45			Faecalibacterium_prausnitzii_SL3	P47-2	P53-1	4
Bacteroides_vulgatus	GE7-2-T30	NL1-1-T0	41			Faecalibacterium_prausnitzii_SL3	P47-2	P53-2	4
Bacteroides_vulgatus	GE7-1-T0	NL1-1-T0	40			Faecalibacterium_prausnitzii_SL3	P47-2	P54-2	4
Bacteroides_vulgatus	GE7-1-T7	NL1-1-T0	40			Faecalibacterium_prausnitzii_SL3	P54-2	P82-1	4
Bacteroides_vulgatus	GE7-1-T0	NL1-1-T7	38			Faecalibacterium_prausnitzii_SL3	P47-1	P82-1	4
Bacteroides_vulgatus	GE7-2-T30	NL1-1-T7	38			Faecalibacterium_prausnitzii_SL3	P47-2	P82-1	4
Bacteroides_vulgatus	GE7-1-T7	NL1-1-T7	38			Faecalibacterium_prausnitzii_SL3	P5-1	P53-1	4
Bacteroides_vulgatus	GE7-2-T30	NL1-1-T28	38			Faecalibacterium_prausnitzii_SL3	P54-1	P82-1	4
Bacteroides_vulgatus	GE7-1-T0	NL1-1-T28	37			Faecalibacterium_prausnitzii_SL3	P47-1	P5-1	4
Bacteroides_vulgatus	GE7-1-T7	NL1-1-T28	37			Faecalibacterium_prausnitzii_SL3	P5-1	P54-2	4
Bacteroides_vulgatus	GE7-1-T30	GE3-1-T0	37			Faecalibacterium_prausnitzii_SL3	P5-2	P53-1	4
Bacteroides_vulgatus	GE7-2-T0	GE3-1-T0	37			Faecalibacterium_prausnitzii_SL3	P5-2	P53-2	4
Bacteroides_vulgatus	GE7-2-T0	GE3-1-T7	37			Faecalibacterium_prausnitzii_SL3	P5-1	P54-1	4
Bacteroides_vulgatus	GE7-2-T0	GE3-1-T30	37			Faecalibacterium_prausnitzii_SL3	P5-2	P54-2	4
Bacteroides_vulgatus	GE7-1-T30	GE3-1-T7	36			Faecalibacterium_prausnitzii_SL3	P5-2	P54-1	4
Bacteroides_vulgatus	GE7-1-T30	GE3-1-T30	36			Faecalibacterium_prausnitzii_SL3	P29-1	P47-2	4
Bacteroides_vulgatus	GE7-2-T0	GE3-2-T0	36			Faecalibacterium_prausnitzii_SL3	P29-1	P47-1	4
Bacteroides_vulgatus	GE7-2-T7	GE3-1-T0	35			Faecalibacterium_prausnitzii_SL3	P47-2	P5-1	3
Bacteroides_vulgatus	GE7-2-T7	GE3-1-T7	35			Faecalibacterium_prausnitzii_SL3	P47-2	P5-2	3
Bacteroides_vulgatus	GE7-2-T7	GE3-1-T30	35			Faecalibacterium_prausnitzii_SL3	P47-1	P5-2	3
Bacteroides_vulgatus	GE7-1-T30	GE3-2-T0	35			Parabacteroides_merdae	P29-2	P5-1	77
Bacteroides_vulgatus	GE3-2-T7	NL1-2-T0	34			Parabacteroides_merdae	P53-1	P54-1	71
Bacteroides_vulgatus	GE4-2-T30	NL1-2-T0	34			Parabacteroides_merdae	P53-2	P54-1	70
Bacteroides_vulgatus	GE4-2-T7	NL1-2-T0	34			Parabacteroides_merdae	P29-1	P29-2	62
Bacteroides_vulgatus	GE7-2-T7	GE3-2-T0	34			Parabacteroides_merdae	P29-1	P53-2	48
Bacteroides_vulgatus	NL1-2-T0	GE3-2-T30	34			Parabacteroides_merdae	P29-1	P54-1	46
Bacteroides_vulgatus	NL1-2-T0	GE4-1-T30	34			Parabacteroides_merdae	P47-2	P53-2	44
Bacteroides_vulgatus	NL1-2-T0	GE4-1-T7	34			Parabacteroides_merdae	P29-1	P5-1	43
Bacteroides_vulgatus	GE7-2-T0	NL1-2-T0	33			Parabacteroides_merdae	P54-1	P82-2	41
Bacteroides_vulgatus	GE3-2-T7	NL1-2-T7	33			Parabacteroides_merdae	P53-1	P82-2	40
Bacteroides_vulgatus	GE3-2-T7	NL1-2-T28	33			Parabacteroides_merdae	P29-2	P54-1	36
Bacteroides_vulgatus	GE4-2-T0	NL1-2-T0	33			Parabacteroides_merdae	P5-1	P54-1	34
Bacteroides_vulgatus	NL1-2-T7	GE3-2-T30	33			Parabacteroides_merdae	P29-2	P53-2	34
Bacteroides_vulgatus	NL1-2-T7	GE4-1-T7	33			Parabacteroides_merdae	P5-1	P53-2	33
Bacteroides_vulgatus	GE7-1-T30	NL1-2-T0	32			Parabacteroides_merdae	P29-1	P53-1	33
Bacteroides_vulgatus	GE4-2-T30	NL1-2-T7	32			Parabacteroides_merdae	P29-2	P82-2	32
Bacteroides_vulgatus	GE4-2-T0	NL1-2-T7	32			Parabacteroides_merdae	P5-1	P53-1	32
Bacteroides_vulgatus	GE4-2-T7	NL1-2-T7	32			Parabacteroides_merdae	P29-2	P53-1	32
Bacteroides_vulgatus	NL1-2-T28	GE3-2-T30	32			Parabacteroides_merdae	P5-1	P82-2	31
Bacteroides_vulgatus	NL1-2-T7	GE4-1-T30	32			Parabacteroides_merdae	P29-1	P82-2	31
Bacteroides_vulgatus	NL1-2-T28	GE4-1-T30	32			Parabacteroides_merdae	P5-2	P53-2	28
Bacteroides_vulgatus	NL1-2-T28	GE4-1-T7	32			Parabacteroides_merdae	P53-2	P82-2	28
Bacteroides_vulgatus	GE7-2-T7	NL1-2-T0	31			Parabacteroides_merdae	P29-1	P97-1	27
Bacteroides_vulgatus	GE7-2-T0	NL1-2-T7	31			Parabacteroides_merdae	P54-1	P97-1	25
Bacteroides_vulgatus	GE4-2-T30	NL1-2-T28	31			Parabacteroides_merdae	P47-2	P54-1	23
Bacteroides_vulgatus	GE4-2-T0	NL1-2-T28	31			Parabacteroides_merdae	P5-2	P54-1	21
Bacteroides_vulgatus	GE4-2-T7	NL1-2-T28	31			Parabacteroides_merdae	P29-1	P5-2	20
Bacteroides_vulgatus	GE4-2-T30	GE3-2-T30	31			Parabacteroides_merdae	P53-2	P97-1	20
Bacteroides_vulgatus	GE4-1-T30	GE3-2-T30	31			Parabacteroides_merdae	P53-1	P97-1	20
Bacteroides_vulgatus	GE4-2-T0	GE3-2-T30	31			Parabacteroides_merdae	P29-1	P47-2	19
Bacteroides_vulgatus	GE4-2-T7	GE3-2-T30	31			Parabacteroides_merdae	P82-2	P97-1	17
Bacteroides_vulgatus	GE3-2-T7	GE4-1-T7	31			Parabacteroides_merdae	P5-2	P53-1	17
Bacteroides_vulgatus	GE3-2-T30	GE4-1-T7	31			Parabacteroides_merdae	P29-2	P97-1	16
Bacteroides_vulgatus	GE7-1-T30	NL1-2-T7	30			Parabacteroides_merdae	P5-2	P82-2	16
Bacteroides_vulgatus	GE7-2-T0	NL1-2-T28	30			Parabacteroides_merdae	P47-2	P5-2	15
Bacteroides_vulgatus	GE3-2-T7	GE4-2-T0	30			Parabacteroides_merdae	P29-2	P5-2	15
Bacteroides_vulgatus	GE3-2-T7	GE4-2-T7	30			Parabacteroides_merdae	P29-2	P47-2	14
Bacteroides_vulgatus	GE3-2-T7	GE4-2-T30	30			Parabacteroides_merdae	P5-1	P97-1	13
Bacteroides_vulgatus	GE3-2-T7	GE4-1-T30	30			Parabacteroides_merdae	P5-2	P97-1	13
Bacteroides_vulgatus	GE7-1-T30	NL1-2-T28	29			Parabacteroides_merdae	P47-2	P5-1	11
Bacteroides_vulgatus	GE7-2-T7	NL1-2-T7	29			Parabacteroides_merdae	P5-1	P5-2	10
Bacteroides_vulgatus	GE7-2-T7	NL1-2-T28	28			Parabacteroides_merdae	P47-2	P97-1	10
Bacteroides_vulgatus	GE3-2-T7	NL1-1-T0	27			Parabacteroides_merdae	P47-2	P82-2	7
Bacteroides_vulgatus	GE3-2-T30	NL1-1-T0	27			Parabacteroides_merdae	P47-2	P53-1	4
Bacteroides_vulgatus	GE4-1-T7	NL1-1-T0	27			Parabacteroides_sp_D13	P5-2	P82-2	91
Bacteroides_vulgatus	GE3-2-T7	NL1-1-T7	26			Parabacteroides_sp_D13	P47-1	P5-2	82
Bacteroides_vulgatus	GE3-2-T7	NL1-1-T28	26			Parabacteroides_sp_D13	P47-1	P82-2	81
Bacteroides_vulgatus	GE3-2-T30	NL1-1-T7	26			Parabacteroides_sp_D13	P5-1	P97-2	70
Bacteroides_vulgatus	GE3-2-T30	NL1-1-T28	26			Parabacteroides_sp_D13	P47-1	P97-1	50
Bacteroides_vulgatus	GE4-2-T30	NL1-1-T0	26			Parabacteroides_sp_D13	P5-1	P54-1	50
Bacteroides_vulgatus	GE4-1-T30	NL1-1-T0	26			Parabacteroides_sp_D13	P82-2	P97-2	36
Bacteroides_vulgatus	GE4-2-T0	NL1-1-T0	26			Parabacteroides_sp_D13	P5-2	P54-1	35
Bacteroides_vulgatus	GE4-2-T7	NL1-1-T0	26			Parabacteroides_sp_D13	P5-1	P5-2	33
Bacteroides_vulgatus	GE7-1-T30	NL1-1-T0	25			Parabacteroides_sp_D13	P29-1	P97-2	32
Bacteroides_vulgatus	GE7-2-T0	NL1-1-T0	25			Parabacteroides_sp_D13	P5-2	P53-1	31
Bacteroides_vulgatus	GE4-2-T30	NL1-1-T7	25			Parabacteroides_sp_D13	P47-1	P54-1	28
Bacteroides_vulgatus	GE4-1-T30	NL1-1-T7	25			Parabacteroides_sp_D13	P29-1	P5-2	26
Bacteroides_vulgatus	GE4-2-T0	NL1-1-T7	25			Parabacteroides_sp_D13	P53-1	P54-1	24
Bacteroides_vulgatus	GE4-2-T7	NL1-1-T7	25			Parabacteroides_sp_D13	P47-1	P53-1	23
Bacteroides_vulgatus	GE4-2-T30	NL1-1-T28	25			Parabacteroides_sp_D13	P47-1	P5-1	22
Bacteroides_vulgatus	GE4-1-T30	NL1-1-T28	25			Parabacteroides_sp_D13	P47-1	P7-1	22
Bacteroides_vulgatus	GE4-1-T7	NL1-1-T28	25			Parabacteroides_sp_D13	P54-1	P82-2	22
Bacteroides_vulgatus	GE4-2-T0	NL1-1-T28	25			Parabacteroides_sp_D13	P53-1	P82-2	21
Bacteroides_vulgatus	GE4-2-T7	NL1-1-T28	25			Parabacteroides_sp_D13	P29-1	P53-1	20
Bacteroides_vulgatus	NL1-1-T7	GE4-1-T7	25			Parabacteroides_sp_D13	P5-1	P53-1	20
Bacteroides_vulgatus	GE7-2-T0	NL1-1-T7	24			Parabacteroides_sp_D13	P7-1	P97-1	19
Bacteroides_vulgatus	GE7-2-T7	NL1-1-T0	24			Parabacteroides_sp_D13	P5-1	P82-2	18
Bacteroides_vulgatus	GE7-2-T7	NL1-1-T7	23			Parabacteroides_sp_D13	P29-1	P54-1	18
Bacteroides_vulgatus	GE7-1-T30	NL1-1-T7	23			Parabacteroides_sp_D13	P29-1	P47-1	14
Bacteroides_vulgatus	GE7-2-T0	NL1-1-T28	23			Parabacteroides_sp_D13	P97-1	P97-2	13
Bacteroides_vulgatus	GE7-2-T7	NL1-1-T28	22			Parabacteroides_sp_D13	P29-1	P5-1	12
Bacteroides_vulgatus	GE7-1-T30	NL1-1-T28	22			Parabacteroides_sp_D13	P7-1	P97-2	12
Bacteroides_vulgatus	GE7-2-T0	GE3-2-T30	20			Parabacteroides_sp_D13	P29-1	P82-2	11
Bacteroides_vulgatus	GE7-1-T30	GE4-2-T0	20			Parabacteroides_sp_D13	P53-1	P97-1	10
Bacteroides_vulgatus	GE7-1-T30	GE4-2-T7	20			Parabacteroides_sp_D13	P5-2	P97-1	10
Bacteroides_vulgatus	GE7-1-T30	GE4-2-T30	20			Parabacteroides_sp_D13	P5-2	P7-1	8
Bacteroides_vulgatus	GE7-1-T30	GE4-1-T30	20			Parabacteroides_sp_D13	P53-1	P7-1	7
Bacteroides_vulgatus	GE7-1-T30	GE4-1-T7	20			Parabacteroides_sp_D13	P54-1	P97-1	6
Bacteroides_vulgatus	GE7-2-T0	GE4-2-T0	20			Parabacteroides_sp_D13	P29-1	P97-1	4
Bacteroides_vulgatus	GE7-2-T0	GE4-2-T7	20			Parabacteroides_sp_D13	P5-1	P97-1	4
Bacteroides_vulgatus	GE7-2-T0	GE4-2-T30	20			Parabacteroides_sp_D13	P82-2	P97-1	4
Bacteroides_vulgatus	GE7-2-T0	GE4-1-T30	20			Parabacteroides_sp_D13	P54-1	P7-1	4
Bacteroides_vulgatus	GE7-2-T0	GE4-1-T7	20			Parabacteroides_sp_D13	P7-1	P82-2	3
Bacteroides_vulgatus	GE3-2-T7	GE7-2-T0	20			Parabacteroides_sp_D13	P5-1	P7-1	3
Bacteroides_vulgatus	GE7-2-T7	GE3-2-T7	19			Parabacteroides_sp_D13	P29-1	P7-1	2
Bacteroides_vulgatus	GE7-1-T30	GE3-2-T7	19			Prevotella_copri	P54-2	P7-2	22
Bacteroides_vulgatus	GE7-2-T7	GE3-2-T30	19			Prevotella_copri	P53-1	P54-2	2
Bacteroides_vulgatus	GE7-1-T30	GE3-2-T30	19			Prevotella_copri	P53-1	P7-2	1
Bacteroides_vulgatus	GE7-2-T7	GE4-1-T7	19			Prevotella_copri	P53-1	P54-1	6
Bacteroides_vulgatus	GE7-2-T7	GE4-2-T0	18			Prevotella_copri	P54-1	P7-2	7
Bacteroides_vulgatus	GE7-2-T7	GE4-2-T7	18			Prevotella_copri	P54-1	P54-2	17
Bacteroides_vulgatus	GE7-2-T7	GE4-2-T30	18			Roseburia_intestinalis	P29-1	P82-1	30
Bacteroides_vulgatus	GE7-2-T7	GE4-1-T30	18			Roseburia_intestinalis	P29-2	P82-1	30
Barnesiella_intestinihominis	GE7-2-T7	GE7-2-T30	100			Roseburia_intestinalis	P53-2	P82-1	27
Barnesiella_intestinihominis	GE7-1-T30	GE7-2-T7	100			Roseburia_intestinalis	P29-1	P29-2	26
Barnesiella_intestinihominis	GE7-1-T30	GE7-2-T30	100			Roseburia_intestinalis	P82-1	P97-2	25
Barnesiella_intestinihominis	GE7-1-T30	GE7-1-T7	100			Roseburia_intestinalis	P29-2	P97-2	25
Barnesiella_intestinihominis	GE7-1-T30	GE7-1-T0	100			Roseburia_intestinalis	P53-2	P97-2	24
Barnesiella_intestinihominis	GE7-1-T30	GE7-2-T0	100			Roseburia_intestinalis	P29-1	P53-2	24
Barnesiella_intestinihominis	GE7-2-T7	GE7-1-T7	100			Roseburia_intestinalis	P29-2	P53-2	24
Barnesiella_intestinihominis	GE7-2-T7	GE7-1-T0	100			Roseburia_intestinalis	P47-1	P82-1	23
Barnesiella_intestinihominis	GE7-2-T7	GE7-2-T0	100			Roseburia_intestinalis	P29-1	P97-2	23
Barnesiella_intestinihominis	GE7-2-T30	GE7-1-T7	100			Roseburia_intestinalis	P29-2	P47-1	23
Barnesiella_intestinihominis	GE7-2-T30	GE7-1-T0	100			Roseburia_intestinalis	P29-1	P47-1	21
Barnesiella_intestinihominis	GE7-2-T30	GE7-2-T0	100			Roseburia_intestinalis	P47-1	P53-2	21
Barnesiella_intestinihominis	GE3-2-T0	GE3-1-T7	100			Roseburia_intestinalis	P47-1	P97-2	20
Barnesiella_intestinihominis	GE7-1-T7	GE7-1-T0	100
Barnesiella_intestinihominis	GE3-2-T0	GE3-1-T0	100
Barnesiella_intestinihominis	GE4-2-T0	GE4-1-T30	100
Barnesiella_intestinihominis	GE7-1-T7	GE7-2-T0	100
Barnesiella_intestinihominis	GE7-1-T0	GE7-2-T0	100
Barnesiella_intestinihominis	GE3-1-T7	GE3-1-T0	100
Barnesiella_intestinihominis	GE4-2-T0	GE4-2-T7	100
Barnesiella_intestinihominis	GE4-1-T30	GE4-2-T7	100
Barnesiella_intestinihominis	GE3-2-T0	GE3-1-T30	100
Barnesiella_intestinihominis	GE3-1-T7	GE3-1-T30	100
Barnesiella_intestinihominis	GE3-1-T0	GE3-1-T30	100
Barnesiella_intestinihominis	GE4-2-T0	GE4-2-T30	100
Barnesiella_intestinihominis	GE4-2-T0	GE4-1-T7	100
Barnesiella_intestinihominis	GE4-1-T30	GE4-2-T30	100
Barnesiella_intestinihominis	GE4-1-T30	GE4-1-T7	100
Barnesiella_intestinihominis	GE4-2-T7	GE4-2-T30	100
Barnesiella_intestinihominis	GE4-2-T7	GE4-1-T7	100
Barnesiella_intestinihominis	NL1-1-T7	NL1-1-T0	100
Barnesiella_intestinihominis	GE4-2-T30	GE4-1-T7	100
Barnesiella_intestinihominis	NL1-2-T0	NL1-1-T7	99
Barnesiella_intestinihominis	NL1-2-T0	NL1-1-T0	99
Barnesiella_intestinihominis	GE3-1-T30	GE4-1-T7	52
Barnesiella_intestinihominis	GE3-1-T30	GE4-2-T30	51
Barnesiella_intestinihominis	GE3-1-T7	GE4-2-T30	48
Barnesiella_intestinihominis	GE3-1-T0	GE4-2-T30	48
Barnesiella_intestinihominis	GE4-1-T30	GE3-1-T30	47
Barnesiella_intestinihominis	GE4-2-T7	GE3-1-T30	47
Barnesiella_intestinihominis	GE3-2-T0	GE4-2-T30	47
Barnesiella_intestinihominis	GE3-2-T0	GE4-1-T7	47
Barnesiella_intestinihominis	GE3-1-T7	GE4-1-T7	47
Barnesiella_intestinihominis	GE3-1-T0	GE4-1-T7	47
Barnesiella_intestinihominis	GE4-2-T0	GE3-1-T30	46
Barnesiella_intestinihominis	GE3-1-T0	GE4-2-T7	44
Barnesiella_intestinihominis	GE3-2-T0	GE4-2-T7	43
Barnesiella_intestinihominis	GE3-1-T0	GE4-1-T30	43
Barnesiella_intestinihominis	GE3-1-T7	GE4-2-T7	43
Barnesiella_intestinihominis	GE4-2-T0	GE3-1-T0	42
Barnesiella_intestinihominis	GE3-2-T0	GE4-1-T30	42
Barnesiella_intestinihominis	GE3-1-T7	GE4-1-T30	42
Barnesiella_intestinihominis	GE4-2-T0	GE3-1-T7	41
Barnesiella_intestinihominis	GE3-2-T0	GE4-2-T0	41
Barnesiella_intestinihominis	GE3-1-T30	NL1-2-T0	17
Barnesiella_intestinihominis	GE3-1-T30	NL1-1-T7	17
Barnesiella_intestinihominis	GE3-1-T30	NL1-1-T0	17
Barnesiella_intestinihominis	GE4-2-T30	NL1-2-T0	17
Barnesiella_intestinihominis	GE4-2-T30	NL1-1-T7	17
Barnesiella_intestinihominis	GE4-2-T30	NL1-1-T0	17
Barnesiella_intestinihominis	GE4-1-T7	NL1-1-T7	17
Barnesiella_intestinihominis	GE4-1-T7	NL1-1-T0	17
Barnesiella_intestinihominis	GE4-1-T7	NL1-2-T0	16
Barnesiella_intestinihominis	GE7-2-T7	GE4-2-T30	13
Barnesiella_intestinihominis	GE7-2-T30	GE4-2-T30	13
Barnesiella_intestinihominis	GE7-2-T7	GE4-1-T30	12
Barnesiella_intestinihominis	GE7-2-T7	GE4-2-T7	12
Barnesiella_intestinihominis	GE7-2-T30	GE4-1-T30	12
Barnesiella_intestinihominis	GE7-2-T30	GE4-2-T7	12
Barnesiella_intestinihominis	GE7-2-T0	GE4-1-T30	12
Barnesiella_intestinihominis	GE3-1-T7	NL1-1-T7	12
Barnesiella_intestinihominis	GE3-1-T0	NL1-2-T0	12
Barnesiella_intestinihominis	GE7-1-T30	GE4-2-T30	12
Barnesiella_intestinihominis	GE7-2-T7	GE4-1-T7	12
Barnesiella_intestinihominis	GE7-2-T30	GE4-1-T7	12
Barnesiella_intestinihominis	GE7-1-T7	GE4-2-T30	12
Barnesiella_intestinihominis	GE7-1-T0	GE4-2-T30	12
Barnesiella_intestinihominis	GE7-2-T0	GE4-2-T30	12
Barnesiella_intestinihominis	GE7-2-T0	GE4-1-T7	12
Barnesiella_intestinihominis	GE3-1-T0	NL1-1-T7	12
Barnesiella_intestinihominis	GE3-1-T0	NL1-1-T0	12
Barnesiella_intestinihominis	GE4-2-T7	NL1-1-T7	12
Barnesiella_intestinihominis	GE7-2-T7	GE4-2-T0	11
Barnesiella_intestinihominis	GE7-2-T30	GE4-2-T0	11
Barnesiella_intestinihominis	GE7-1-T30	GE4-1-T30	11
Barnesiella_intestinihominis	GE7-1-T30	GE4-2-T7	11
Barnesiella_intestinihominis	GE7-1-T7	GE4-1-T30	11
Barnesiella_intestinihominis	GE7-1-T7	GE4-2-T7	11
Barnesiella_intestinihominis	GE7-1-T0	GE4-1-T30	11
Barnesiella_intestinihominis	GE7-1-T0	GE4-2-T7	11
Barnesiella_intestinihominis	GE7-2-T0	GE4-2-T7	11
Barnesiella_intestinihominis	GE7-1-T30	GE4-1-T7	11
Barnesiella_intestinihominis	GE7-1-T7	GE4-1-T7	11
Barnesiella_intestinihominis	GE7-1-T0	GE4-1-T7	11
Barnesiella_intestinihominis	GE3-2-T0	NL1-2-T0	11
Barnesiella_intestinihominis	GE3-2-T0	NL1-1-T7	11
Barnesiella_intestinihominis	GE3-2-T0	NL1-1-T0	11
Barnesiella_intestinihominis	GE3-1-T7	NL1-2-T0	11
Barnesiella_intestinihominis	GE3-1-T7	NL1-1-T0	11
Barnesiella_intestinihominis	GE4-1-T30	NL1-1-T7	11
Barnesiella_intestinihominis	GE4-2-T7	NL1-2-T0	11
Barnesiella_intestinihominis	GE4-2-T7	NL1-1-T0	11
Barnesiella_intestinihominis	GE4-2-T0	GE7-2-T0	11
Barnesiella_intestinihominis	GE7-1-T30	GE4-2-T0	10
Barnesiella_intestinihominis	GE4-2-T0	NL1-1-T7	10
Barnesiella_intestinihominis	GE4-2-T0	NL1-1-T0	10
Barnesiella_intestinihominis	GE4-1-T30	NL1-2-T0	10
Barnesiella_intestinihominis	GE4-1-T30	NL1-1-T0	10
Barnesiella_intestinihominis	GE4-2-T0	GE7-1-T7	10
Barnesiella_intestinihominis	GE4-2-T0	GE7-1-T0	10
Barnesiella_intestinihominis	GE4-2-T0	NL1-2-T0	9
Barnesiella_intestinihominis	GE7-2-T7	GE3-1-T30	8
Barnesiella_intestinihominis	GE7-2-T30	GE3-1-T30	8
Barnesiella_intestinihominis	GE7-1-T0	GE3-1-T30	8
Barnesiella_intestinihominis	GE7-2-T0	GE3-1-T30	8
Barnesiella_intestinihominis	GE7-2-T7	GE3-1-T0	7
Barnesiella_intestinihominis	GE7-2-T30	GE3-1-T0	7
Barnesiella_intestinihominis	GE7-1-T30	GE3-1-T30	7
Barnesiella_intestinihominis	GE7-1-T7	GE3-1-T30	7
Barnesiella_intestinihominis	GE7-1-T30	NL1-1-T0	7
Barnesiella_intestinihominis	GE7-2-T7	NL1-1-T0	7
Barnesiella_intestinihominis	GE7-2-T30	NL1-1-T0	7
Barnesiella_intestinihominis	GE3-1-T0	GE7-2-T0	7
Barnesiella_intestinihominis	GE7-1-T7	NL1-1-T0	7
Barnesiella_intestinihominis	GE7-1-T0	NL1-1-T0	7
Barnesiella_intestinihominis	GE7-2-T0	NL1-1-T0	7
Barnesiella_intestinihominis	GE7-2-T7	GE3-2-T0	6
Barnesiella_intestinihominis	GE7-2-T7	GE3-1-T7	6
Barnesiella_intestinihominis	GE7-2-T30	GE3-2-T0	6
Barnesiella_intestinihominis	GE7-2-T30	GE3-1-T7	6
Barnesiella_intestinihominis	GE7-1-T30	GE3-1-T0	6
Barnesiella_intestinihominis	GE7-1-T7	GE3-1-T0	6
Barnesiella_intestinihominis	GE7-1-T0	GE3-1-T7	6
Barnesiella_intestinihominis	GE7-1-T0	GE3-1-T0	6
Barnesiella_intestinihominis	GE7-1-T30	NL1-2-T0	6
Barnesiella_intestinihominis	GE7-2-T7	NL1-2-T0	6
Barnesiella_intestinihominis	GE7-2-T30	NL1-2-T0	6
Barnesiella_intestinihominis	GE7-1-T7	NL1-2-T0	6
Barnesiella_intestinihominis	GE7-1-T30	NL1-1-T7	6
Barnesiella_intestinihominis	GE7-2-T7	NL1-1-T7	6
Barnesiella_intestinihominis	GE7-2-T30	NL1-1-T7	6
Barnesiella_intestinihominis	GE7-1-T7	NL1-1-T7	6
Barnesiella_intestinihominis	GE7-1-T0	NL1-2-T0	6
Barnesiella_intestinihominis	GE7-2-T0	NL1-2-T0	6
Barnesiella_intestinihominis	GE7-1-T0	NL1-1-T7	6
Barnesiella_intestinihominis	GE7-2-T0	NL1-1-T7	6
Barnesiella_intestinihominis	GE3-2-T0	GE7-2-T0	6
Barnesiella_intestinihominis	GE3-1-T7	GE7-2-T0	6
Barnesiella_intestinihominis	GE7-1-T30	GE3-2-T0	5
Barnesiella_intestinihominis	GE7-1-T30	GE3-1-T7	5
Barnesiella_intestinihominis	GE7-1-T7	GE3-1-T7	5
Barnesiella_intestinihominis	GE3-2-T0	GE7-1-T7	5
Barnesiella_intestinihominis	GE3-2-T0	GE7-1-T0	5
Bifidobacterium_adolescentis	GE4-1-T7	GE4-1-T30	86
Bifidobacterium_adolescentis	GE7-1-T7	GE7-1-T0	70
Bifidobacterium_adolescentis	GE3-1-T0	GE4-1-T7	42
Bifidobacterium_adolescentis	GE4-1-T7	GE7-1-T0	41
Bifidobacterium_adolescentis	GE3-1-T0	GE7-1-T0	35
Bifidobacterium_adolescentis	GE7-1-T0	GE4-1-T30	28
Bifidobacterium_adolescentis	GE7-1-T7	GE4-1-T30	24
Bifidobacterium_adolescentis	GE7-1-T7	GE4-1-T7	19
Bifidobacterium_adolescentis	GE7-1-T7	NL1-2-T28	18
Bifidobacterium_adolescentis	GE4-1-T30	NL1-2-T28	18
Bifidobacterium_adolescentis	GE3-1-T0	GE4-1-T30	15
Bifidobacterium_adolescentis	GE4-1-T7	NL1-2-T28	12
Bifidobacterium_adolescentis	GE7-1-T0	NL1-2-T28	11
Bifidobacterium_adolescentis	GE3-1-T0	GE7-1-T7	4
Bifidobacterium_adolescentis	GE3-1-T0	NL1-2-T28	1
Collinsella_aerofaciens	GE7-1-T0	GE7-1-T7	100
Collinsella_aerofaciens	GE3-1-T30	GE7-1-T7	2
Collinsella_aerofaciens	GE3-1-T30	GE7-1-T0	1
Coprococcus_eutactus	GE3-1-T7	GE3-1-T0	100
Coprococcus_eutactus	GE3-1-T7	GE3-1-T30	100
Coprococcus_eutactus	GE3-1-T0	GE3-1-T30	100
Coprococcus_eutactus	GE3-1-T30	GE3-2-T0	100
Coprococcus_eutactus	GE3-1-T7	GE3-2-T0	99
Coprococcus_eutactus	GE3-1-T0	GE3-2-T0	99
Coprococcus_eutactus	GE4-1-T30	GE7-2-T30	36
Coprococcus_eutactus	GE3-1-T7	GE4-1-T30	2
Coprococcus_eutactus	GE3-1-T0	GE4-1-T30	2
Coprococcus_eutactus	GE4-1-T30	GE3-1-T30	2
Coprococcus_eutactus	GE4-1-T30	GE3-2-T0	2
Coprococcus_eutactus	GE7-2-T30	GE3-2-T0	2
Coprococcus_eutactus	GE3-1-T7	GE7-2-T30	1
Coprococcus_eutactus	GE3-1-T0	GE7-2-T30	1
Coprococcus_eutactus	GE3-1-T30	GE7-2-T30	1
Dialister_invisus	NL1-1-T7	NL1-1-T0	100
Dialister_invisus	NL1-1-T28	NL1-1-T7	100
Dialister_invisus	NL1-1-T28	NL1-1-T0	100
Dialister_invisus	GE4-2-T7	GE4-2-T0	100
Dialister_invisus	GE4-2-T7	GE4-2-T30	100
Dialister_invisus	GE4-2-T0	GE4-2-T30	100
Dialister_invisus	NL1-2-T28	NL1-2-T7	100
Dialister_invisus	GE7-1-T0	GE7-1-T7	100
Dialister_invisus	NL1-2-T0	NL1-2-T28	100
Dialister_invisus	NL1-2-T0	NL1-2-T7	100
Dialister_invisus	GE3-1-T0	GE3-1-T30	100
Dialister_invisus	GE3-1-T0	GE3-1-T7	100
Dialister_invisus	GE3-1-T30	GE3-1-T7	100
Dialister_invisus	GE4-2-T30	GE4-1-T30	98
Dialister_invisus	GE4-2-T7	GE4-1-T30	98
Dialister_invisus	GE4-2-T0	GE4-1-T30	98
Dialister_invisus	NL1-2-T0	GE3-1-T30	8
Dialister_invisus	NL1-2-T0	GE3-1-T7	8
Dialister_invisus	GE3-1-T0	NL1-2-T0	8
Dialister_invisus	GE3-1-T0	NL1-2-T28	8
Dialister_invisus	GE3-1-T0	NL1-2-T7	8
Dialister_invisus	GE3-1-T30	NL1-2-T28	8
Dialister_invisus	GE3-1-T30	NL1-2-T7	8
Dialister_invisus	GE3-1-T7	NL1-2-T28	8
Dialister_invisus	GE3-1-T7	NL1-2-T7	8
Dialister_invisus	GE3-2-T0	GE4-1-T30	4
Dialister_invisus	GE7-1-T0	GE4-2-T7	4
Dialister_invisus	GE7-1-T0	GE4-2-T30	4
Dialister_invisus	GE7-1-T0	GE4-1-T30	4
Dialister_invisus	GE7-1-T7	GE4-2-T0	4
Dialister_invisus	GE7-1-T7	GE4-2-T30	4
Dialister_invisus	GE7-1-T7	GE4-1-T30	4
Dialister_invisus	GE4-2-T7	GE7-1-T7	4
Dialister_invisus	GE4-2-T7	NL1-2-T0	3
Dialister_invisus	GE4-2-T7	NL1-2-T28	3
Dialister_invisus	GE4-2-T7	NL1-2-T7	3
Dialister_invisus	GE4-2-T0	NL1-2-T28	3
Dialister_invisus	GE4-2-T0	NL1-2-T7	3
Dialister_invisus	GE3-2-T0	GE4-2-T7	3
Dialister_invisus	GE3-2-T0	GE4-2-T0	3
Dialister_invisus	GE7-1-T0	NL1-1-T28	3
Dialister_invisus	GE7-1-T0	NL1-1-T7	3
Dialister_invisus	GE7-1-T0	NL1-1-T0	3
Dialister_invisus	GE3-2-T0	GE4-2-T30	3
Dialister_invisus	GE7-1-T7	NL1-1-T7	3
Dialister_invisus	GE7-1-T7	NL1-1-T0	3
Dialister_invisus	GE3-2-T0	GE3-1-T0	3
Dialister_invisus	GE3-2-T0	GE3-1-T30	3
Dialister_invisus	GE3-2-T0	GE3-1-T7	3
Dialister_invisus	GE7-1-T0	GE4-2-T0	3
Dialister_invisus	NL1-2-T28	GE4-2-T30	3
Dialister_invisus	NL1-2-T28	GE4-1-T30	3
Dialister_invisus	NL1-2-T7	GE4-2-T30	3
Dialister_invisus	NL1-2-T7	GE4-1-T30	3
Dialister_invisus	NL1-2-T0	GE4-2-T0	3
Dialister_invisus	NL1-2-T0	GE4-2-T30	3
Dialister_invisus	NL1-2-T0	GE4-1-T30	3
Dialister_invisus	GE4-1-T30	NL1-1-T7	2
Dialister_invisus	GE4-1-T30	NL1-1-T0	2
Dialister_invisus	NL1-1-T28	GE4-1-T30	2
Dialister_invisus	GE3-2-T0	GE7-1-T0	2
Dialister_invisus	GE3-2-T0	GE7-1-T7	2
Dialister_invisus	NL1-1-T28	GE7-1-T7	2
Dialister_invisus	GE3-2-T0	NL1-2-T0	1
Dialister_invisus	GE3-2-T0	NL1-2-T28	1
Dialister_invisus	GE3-2-T0	NL1-2-T7	1
Dialister_invisus	GE3-2-T0	NL1-1-T28	1
Dialister_invisus	GE3-2-T0	NL1-1-T7	1
Dialister_invisus	GE3-2-T0	NL1-1-T0	1
Dialister_invisus	GE3-1-T0	NL1-1-T28	1
Dialister_invisus	GE3-1-T0	GE4-2-T7	1
Dialister_invisus	GE3-1-T0	GE4-2-T0	1
Dialister_invisus	GE4-2-T7	GE3-1-T30	1
Dialister_invisus	GE4-2-T7	GE3-1-T7	1
Dialister_invisus	GE4-2-T0	GE3-1-T30	1
Dialister_invisus	GE3-1-T0	NL1-1-T7	1
Dialister_invisus	GE3-1-T0	NL1-1-T0	1
Dialister_invisus	GE4-2-T0	GE3-1-T7	1
Dialister_invisus	GE3-1-T30	NL1-1-T7	1
Dialister_invisus	GE3-1-T30	NL1-1-T0	1
Dialister_invisus	GE3-1-T7	NL1-1-T7	1
Dialister_invisus	GE3-1-T0	GE4-2-T30	1
Dialister_invisus	GE3-1-T0	GE4-1-T30	1
Dialister_invisus	GE3-1-T7	GE4-2-T30	1
Dialister_invisus	GE3-1-T30	GE4-2-T30	1
Dialister_invisus	GE3-1-T30	GE4-1-T30	1
Dialister_invisus	GE3-1-T7	GE4-1-T30	1
Dialister_invisus	GE3-1-T7	NL1-1-T0	1
Dialister_invisus	GE4-2-T30	NL1-1-T7	1
Dialister_invisus	GE4-2-T30	NL1-1-T0	1
Dialister_invisus	GE4-2-T7	NL1-1-T7	1
Dialister_invisus	GE4-2-T7	NL1-1-T0	1
Dialister_invisus	GE4-2-T0	NL1-1-T7	1
Dialister_invisus	GE4-2-T0	NL1-1-T0	1
Dialister_invisus	GE7-1-T0	NL1-2-T0	1
Dialister_invisus	GE7-1-T0	NL1-2-T28	1
Dialister_invisus	GE7-1-T0	NL1-2-T7	1
Dialister_invisus	GE7-1-T7	NL1-2-T0	1
Dialister_invisus	NL1-2-T28	NL1-1-T7	1
Dialister_invisus	NL1-2-T28	NL1-1-T0	1
Dialister_invisus	NL1-2-T7	NL1-1-T7	1
Dialister_invisus	NL1-2-T7	NL1-1-T0	1
Dialister_invisus	GE7-1-T7	NL1-2-T28	1
Dialister_invisus	GE7-1-T7	NL1-2-T7	1
Dialister_invisus	NL1-1-T28	NL1-2-T0	1
Dialister_invisus	GE7-1-T0	GE3-1-T0	1
Dialister_invisus	GE7-1-T0	GE3-1-T30	1
Dialister_invisus	NL1-1-T28	NL1-2-T28	1
Dialister_invisus	NL1-1-T28	NL1-2-T7	1
Dialister_invisus	NL1-2-T0	NL1-1-T7	1
Dialister_invisus	NL1-2-T0	NL1-1-T0	1
Dialister_invisus	GE7-1-T0	GE3-1-T7	1
Dialister_invisus	GE7-1-T7	GE3-1-T30	1
Dialister_invisus	GE7-1-T7	GE3-1-T7	1
Dialister_invisus	NL1-1-T28	GE3-1-T30	1
Dialister_invisus	NL1-1-T28	GE3-1-T7	1
Dialister_invisus	NL1-1-T28	GE4-2-T7	1
Dialister_invisus	NL1-1-T28	GE4-2-T0	1
Dialister_invisus	NL1-1-T28	GE4-2-T30	1
Dialister_invisus	GE3-1-T0	GE7-1-T7	1
Eubacterium_eligens	GE7-2-T30	GE7-2-T0	100
Eubacterium_eligens	GE3-1-T7	GE3-1-T30	99
Eubacterium_eligens	GE3-1-T30	GE3-1-T0	99
Eubacterium_eligens	GE3-1-T7	GE3-1-T0	98
Eubacterium_eligens	GE4-2-T7	GE4-1-T7	97
Eubacterium_eligens	GE7-1-T0	GE7-1-T30	97
Eubacterium_eligens	GE7-1-T0	GE7-1-T7	93
Eubacterium_eligens	GE4-1-T30	GE4-1-T7	93
Eubacterium_eligens	GE4-1-T30	GE4-2-T7	92
Eubacterium_eligens	GE7-1-T7	GE7-1-T30	88
Eubacterium_eligens	GE7-1-T7	GE7-2-T7	84
Eubacterium_eligens	GE4-2-T7	GE4-2-T0	83
Eubacterium_eligens	GE7-1-T0	GE7-2-T7	75
Eubacterium_eligens	GE7-2-T0	GE7-2-T7	70
Eubacterium_eligens	GE4-2-T0	GE4-1-T7	68
Eubacterium_eligens	GE7-2-T30	GE7-2-T7	67
Eubacterium_eligens	GE7-2-T0	GE7-1-T7	66
Eubacterium_eligens	GE7-2-T7	GE7-1-T30	65
Eubacterium_eligens	GE7-2-T30	GE7-1-T7	63
Eubacterium_eligens	GE4-1-T30	GE4-2-T0	51
Eubacterium_eligens	GE7-2-T0	GE7-1-T0	38
Eubacterium_eligens	GE7-2-T30	GE7-1-T0	35
Eubacterium_eligens	GE3-2-T0	GE7-2-T7	33
Eubacterium_eligens	GE7-1-T7	GE3-2-T0	32
Eubacterium_eligens	GE3-1-T30	GE3-2-T0	24
Eubacterium_eligens	GE3-1-T0	GE3-2-T0	24
Eubacterium_eligens	GE7-2-T0	GE3-2-T0	24
Eubacterium_eligens	GE4-1-T30	GE7-2-T7	24
Eubacterium_eligens	GE7-2-T30	GE3-2-T0	23
Eubacterium_eligens	GE7-1-T0	GE3-2-T0	23
Eubacterium_eligens	GE3-1-T0	GE4-2-T0	23
Eubacterium_eligens	GE7-2-T7	GE4-1-T7	22
Eubacterium_eligens	GE3-2-T0	GE4-1-T7	22
Eubacterium_eligens	GE3-1-T30	GE7-2-T7	22
Eubacterium_eligens	GE3-1-T0	GE7-2-T7	22
Eubacterium_eligens	GE4-1-T30	GE7-1-T7	22
Eubacterium_eligens	GE4-2-T0	GE3-2-T0	21
Eubacterium_eligens	GE3-1-T7	GE3-2-T0	21
Eubacterium_eligens	GE3-1-T7	GE7-2-T7	20
Eubacterium_eligens	GE3-2-T0	GE7-1-T30	20
Eubacterium_eligens	GE4-1-T30	GE3-2-T0	19
Eubacterium_eligens	GE3-1-T30	GE7-1-T7	19
Eubacterium_eligens	GE3-1-T0	GE7-1-T7	19
Eubacterium_eligens	GE7-1-T7	GE4-1-T7	18
Eubacterium_eligens	GE3-1-T7	GE7-1-T7	18
Eubacterium_eligens	GE7-1-T0	GE4-2-T0	17
Eubacterium_eligens	GE7-1-T7	GE4-2-T0	17
Eubacterium_eligens	GE3-1-T30	GE4-2-T0	17
Eubacterium_eligens	GE4-2-T7	GE3-2-T0	17
Eubacterium_eligens	GE4-2-T7	GE7-2-T7	17
Eubacterium_eligens	GE4-2-T0	GE7-1-T30	17
Eubacterium_eligens	GE7-1-T0	GE4-1-T30	16
Eubacterium_eligens	GE7-2-T30	GE7-1-T30	16
Eubacterium_eligens	GE7-2-T0	GE7-1-T30	16
Eubacterium_eligens	GE4-1-T30	GE7-1-T30	16
Eubacterium_eligens	GE4-2-T0	GE7-2-T7	16
Eubacterium_eligens	GE7-2-T30	GE4-2-T0	15
Eubacterium_eligens	GE7-2-T0	GE4-2-T0	15
Eubacterium_eligens	GE7-2-T30	GE3-1-T30	14
Eubacterium_eligens	GE7-2-T30	GE3-1-T0	14
Eubacterium_eligens	GE3-1-T0	GE4-1-T7	14
Eubacterium_eligens	GE3-1-T7	GE4-2-T0	14
Eubacterium_eligens	GE3-1-T7	GE7-2-T30	14
Eubacterium_eligens	GE3-1-T30	GE7-2-T0	14
Eubacterium_eligens	GE3-1-T0	GE7-2-T0	14
Eubacterium_eligens	GE4-2-T7	GE7-1-T7	14
Eubacterium_eligens	GE4-1-T7	GE7-1-T30	14
Eubacterium_eligens	GE7-1-T0	GE4-1-T7	13
Eubacterium_eligens	GE3-1-T7	GE7-2-T0	13
Eubacterium_eligens	GE3-1-T30	GE4-1-T7	12
Eubacterium_eligens	GE3-1-T30	GE7-1-T30	12
Eubacterium_eligens	GE3-1-T0	GE7-1-T30	12
Eubacterium_eligens	GE7-2-T0	GE4-1-T7	11
Eubacterium_eligens	GE3-1-T7	GE7-1-T0	11
Eubacterium_eligens	GE3-1-T30	GE7-1-T0	11
Eubacterium_eligens	GE3-1-T0	GE7-1-T0	11
Eubacterium_eligens	GE3-1-T0	GE4-2-T7	10
Eubacterium_eligens	GE3-1-T7	GE4-1-T7	10
Eubacterium_eligens	GE7-1-T0	GE4-2-T7	10
Eubacterium_eligens	GE7-2-T30	GE4-1-T7	10
Eubacterium_eligens	GE3-1-T7	GE7-1-T30	10
Eubacterium_eligens	GE4-2-T7	GE7-1-T30	10
Eubacterium_eligens	GE3-1-T30	GE4-1-T30	9
Eubacterium_eligens	GE3-1-T30	GE4-2-T7	9
Eubacterium_eligens	GE3-1-T0	GE4-1-T30	9
Eubacterium_eligens	GE7-2-T0	GE4-1-T30	9
Eubacterium_eligens	GE3-1-T7	GE4-2-T7	8
Eubacterium_eligens	GE3-1-T7	GE4-1-T30	8
Eubacterium_eligens	GE7-2-T30	GE4-1-T30	8
Eubacterium_eligens	GE7-2-T30	GE4-2-T7	8
Eubacterium_eligens	GE7-2-T0	GE4-2-T7	7
Eubacterium_rectale	GE7-1-T0	GE7-1-T7	100
Eubacterium_rectale	GE7-2-T0	GE7-2-T30	100
Eubacterium_rectale	GE3-1-T0	GE3-1-T7	100
Eubacterium_rectale	GE3-1-T0	GE3-1-T30	100
Eubacterium_rectale	GE4-1-T30	GE4-1-T7	100
Eubacterium_rectale	GE3-1-T7	GE3-2-T0	99
Eubacterium_rectale	GE3-1-T7	GE3-1-T30	99
Eubacterium_rectale	GE3-1-T0	GE3-2-T0	99
Eubacterium_rectale	GE3-2-T0	GE3-1-T30	99
Eubacterium_rectale	GE7-1-T0	GE7-2-T0	97
Eubacterium_rectale	GE7-1-T7	GE7-2-T0	97
Eubacterium_rectale	GE7-1-T0	GE7-2-T30	96
Eubacterium_rectale	GE7-1-T7	GE7-2-T30	96
Eubacterium_rectale	NL1-1-T7	NL1-1-T28	96
Eubacterium_rectale	NL1-2-T7	NL1-2-T28	91
Eubacterium_rectale	NL1-2-T7	NL1-1-T28	41
Eubacterium_rectale	NL1-2-T28	NL1-1-T28	37
Eubacterium_rectale	NL1-2-T7	NL1-1-T7	36
Eubacterium_rectale	NL1-1-T7	NL1-2-T28	31
Eubacterium_rectale	GE4-1-T7	NL1-1-T28	24
Eubacterium_rectale	GE4-1-T30	NL1-1-T28	22
Eubacterium_rectale	NL1-2-T28	GE7-2-T30	20
Eubacterium_rectale	GE7-2-T30	NL1-1-T28	19
Eubacterium_rectale	GE3-1-T0	NL1-1-T28	19
Eubacterium_rectale	GE3-1-T7	NL1-1-T28	19
Eubacterium_rectale	GE3-1-T30	NL1-1-T28	19
Eubacterium_rectale	GE3-2-T0	NL1-1-T28	19
Eubacterium_rectale	GE4-2-T30	NL1-1-T28	17
Eubacterium_rectale	NL1-2-T7	GE7-2-T30	17
Eubacterium_rectale	NL1-2-T28	GE4-2-T30	16
Eubacterium_rectale	NL1-1-T7	GE4-1-T7	16
Eubacterium_rectale	NL1-2-T7	GE4-2-T30	15
Eubacterium_rectale	NL1-1-T7	GE7-2-T30	15
Eubacterium_rectale	GE7-2-T30	GE4-2-T30	14
Eubacterium_rectale	NL1-1-T7	GE4-2-T30	14
Eubacterium_rectale	GE7-2-T0	NL1-2-T28	13
Eubacterium_rectale	GE4-1-T30	NL1-1-T7	13
Eubacterium_rectale	GE7-1-T0	NL1-2-T28	12
Eubacterium_rectale	GE7-1-T7	NL1-2-T28	12
Eubacterium_rectale	GE7-2-T0	NL1-1-T28	12
Eubacterium_rectale	NL1-2-T7	GE4-1-T7	11
Eubacterium_rectale	GE7-1-T0	NL1-1-T28	11
Eubacterium_rectale	GE7-1-T7	NL1-1-T28	11
Eubacterium_rectale	GE7-1-T0	GE4-2-T30	10
Eubacterium_rectale	GE3-2-T0	NL1-2-T7	10
Eubacterium_rectale	GE3-2-T0	NL1-1-T7	10
Eubacterium_rectale	GE7-1-T7	GE4-2-T30	9
Eubacterium_rectale	GE7-2-T0	GE4-2-T30	9
Eubacterium_rectale	GE3-1-T0	NL1-2-T7	9
Eubacterium_rectale	GE3-1-T7	NL1-2-T7	9
Eubacterium_rectale	GE3-1-T0	NL1-1-T7	9
Eubacterium_rectale	GE3-1-T7	NL1-1-T7	9
Eubacterium_rectale	GE3-1-T30	NL1-2-T7	9
Eubacterium_rectale	GE3-1-T30	NL1-1-T7	9
Eubacterium_rectale	GE7-1-T0	NL1-2-T7	9
Eubacterium_rectale	GE4-1-T30	NL1-2-T7	9
Eubacterium_rectale	NL1-2-T7	GE7-2-T0	9
Eubacterium_rectale	GE7-1-T7	NL1-2-T7	8
Eubacterium_rectale	GE3-2-T0	GE4-1-T30	7
Eubacterium_rectale	NL1-2-T28	GE4-1-T7	7
Eubacterium_rectale	GE3-1-T0	NL1-2-T28	7
Eubacterium_rectale	GE3-1-T7	NL1-2-T28	7
Eubacterium_rectale	GE3-2-T0	NL1-2-T28	7
Eubacterium_rectale	GE3-1-T30	NL1-2-T28	7
Eubacterium_rectale	GE4-1-T30	NL1-2-T28	7
Eubacterium_rectale	GE7-2-T0	NL1-1-T7	7
Eubacterium_rectale	GE3-1-T0	GE4-1-T30	6
Eubacterium_rectale	GE3-1-T7	GE4-1-T30	6
Eubacterium_rectale	GE3-1-T30	GE4-1-T30	6
[truncated: 901 more rows]
